# Supplementary material for: Small intestinal flora graft alters fecal flora, stool, cytokines and mood status in healthy mice
Source: Life Sci Alliance. 2021 Jul 23;4(9):e202101039. doi: 10.26508/lsa.202101039 (PMC8321674; doi:10.26508/lsa.202101039)
Supplement: Supplementary file 1 [file LSA-2021-01039_TableS1.xlsx]

## Sheet: S.table1
Kruskal-Wallis H test for the relative abundance of all the 832 OUTs among three groups (18 recipient samples)																					The relative abundance of all the 832 OUTs from the 2 graft samples
OTU ID	CON group						SIMT group						LIMT group						P value reported by Kruskal-Wallis H test (colored cells indicate where P < 0.05)		Relative abundance of OUT in sample of small intestine graft	Relative abundance of OTU in in sample of large intestine graft
	CON1	CON2	CON3	CON4	CON5	CON6	SIMT1	SIMT2	SIMT3	SIMT4	SIMT5	SIMT6	LIMT1	LIMT2	LIMT3	LIMT4	LIMT5	LIMT6
d__Bacteria; k__norank_d__Bacteria; p__Firmicutes; c__Bacilli; o__Lactobacillales; f__Lactobacillaceae; g__Lactobacillus; s__Lactobacillus_murinus; OTU634	0.00132677	0.0107854	0.0145517	0.00226835	0.0365076	0.00372352	0.0457522	0.0187032	0.234453	0.045367	0.555361	0.268478	0.00124117	0.0288466	0.020244	0.0328269	0.00342392	0.00522149	0.0106323		0.204408	0.00641986
d__Bacteria; k__norank_d__Bacteria; p__Firmicutes; c__Bacilli; o__Lactobacillales; f__Lactobacillaceae; g__Lactobacillus; s__Lactobacillus_johnsonii; OTU785	0.00119837	0.00179756	0.0122833	0.000128397	0.408303	0.00778943	0.144147	0.0463942	0.15275	0.0422855	0.0150225	0.108153	0.0044939	0.00119837	0.091376	0.00821742	0.0163492	0.0353948	0.0555534		0.315215	0.011085
d__Bacteria; k__norank_d__Bacteria; p__Bacteroidota; c__Bacteroidia; o__Bacteroidales; f__Muribaculaceae; g__norank_f__Muribaculaceae; s__uncultured_bacterium_g__norank_f__Muribaculaceae; OTU620	0.0308581	0.0821314	0.0892788	0.0191312	0.00393751	0.107854	0.00115557	0.0250802	0.0174192	0.0109566	0.000813182	0.0105286	0.120437	0.0762251	0.00522149	0.00355232	0.029403	0.0932163	0.0947299		0.000299593	0.0694629
d__Bacteria; k__norank_d__Bacteria; p__Firmicutes; c__Clostridia; o__Lachnospirales; f__Lachnospiraceae; g__Lachnospiraceae_NK4A136_group; s__uncultured_bacterium_g__Lachnospiraceae_NK4A136_group; OTU379	0.0439974	0.0043227	0	0.236165	0.158271	0.00710464	0	8.55981e-05	0.00641986	4.27991e-05	0.000385192	0	0.00543548	0.00291034	0.000171196	0.289878	0.00329553	0.0163064	0.0593368		0.00346672	0.0148513
d__Bacteria; k__norank_d__Bacteria; p__Bacteroidota; c__Bacteroidia; o__Bacteroidales; f__Prevotellaceae; g__Alloprevotella; s__uncultured_Bacteroidales_bacterium_g__Alloprevotella; OTU274	0.00338113	0.00534988	0.0361224	0.000213995	0.00612027	0.0163064	0	0	0.137471	0	0.000128397	0.00166916	0.0171196	0.0875669	0.0423283	0.0583351	0.00218275	0.0300877	0.0447622		4.27991e-05	0.172395
d__Bacteria; k__norank_d__Bacteria; p__Verrucomicrobiota; c__Verrucomicrobiae; o__Verrucomicrobiales; f__Akkermansiaceae; g__Akkermansia; s__Akkermansia_muciniphila; OTU240	0.000299593	0	0	0	0	8.55981e-05	0.00286754	0.00744704	4.27991e-05	0.00128397	0.00787503	0.0210571	0.381168	0.000213995	0	0	0	0.103617	0.0647559		0.000213995	0.0270918
d__Bacteria; k__norank_d__Bacteria; p__Bacteroidota; c__Bacteroidia; o__Bacteroidales; f__Muribaculaceae; g__norank_f__Muribaculaceae; s__uncultured_organism_g__norank_f__Muribaculaceae; OTU220	0.046223	0.0866253	0	0.185234	0	0.0884657	0	0	0	8.55981e-05	0.00633426	8.55981e-05	0.0124117	4.27991e-05	0	0	0	0.0428419	0.207606		8.55981e-05	0.0232399
d__Bacteria; k__norank_d__Bacteria; p__Bacteroidota; c__Bacteroidia; o__Bacteroidales; f__Muribaculaceae; g__norank_f__Muribaculaceae; s__unclassified_g__norank_f__Muribaculaceae; OTU566	0	0	0	0	0	0	0.0160496	0.222812	0	0.185876	0	0.0361652	0	0	0	0	0.00128397	0	0.0216911		0	0
d__Bacteria; k__norank_d__Bacteria; p__Firmicutes; c__Bacilli; o__Lactobacillales; f__Lactobacillaceae; g__Lactobacillus; s__Lactobacillus_reuteri; OTU542	0.000342392	0.000256794	0.00162636	8.55981e-05	0.0115129	0.00128397	0.225123	0.0247379	0.000727584	0.0124545	0.0216991	0.0474214	0.000984378	0.000128397	0.0225551	0.0142521	0.00269634	0.00603467	0.033845		0.0258934	0.00261074
d__Bacteria; k__norank_d__Bacteria; p__Firmicutes; c__Clostridia; o__Lachnospirales; f__Lachnospiraceae; g__Lachnospiraceae_NK4A136_group; s__uncultured_Clostridiales_bacterium_g__Lachnospiraceae_NK4A136_group; OTU663	0.00389471	0.000727584	0.00179756	0.000855981	0	0.000171196	0.000770383	0.0301733	0	0.271389	0.000171196	0.00748984	0	0.00222555	0.00483629	0.000513589	0.0400171	0.00376632	0.556349		4.27991e-05	8.55981e-05
d__Bacteria; k__norank_d__Bacteria; p__Bacteroidota; c__Bacteroidia; o__Bacteroidales; f__Muribaculaceae; g__norank_f__Muribaculaceae; s__uncultured_bacterium_g__norank_f__Muribaculaceae; OTU222	0.00997218	0.017462	0.0194736	0.000770383	0.00483629	0.0237963	0.000256794	0.0130537	0.011085	0.00175476	0.000342392	0.000385192	0.0609887	0.0302161	0.0107854	0.00522149	0.0188316	0.0656538	0.033845		0.000256794	0.0578215
d__Bacteria; k__norank_d__Bacteria; p__Firmicutes; c__Bacilli; o__Erysipelotrichales; f__Erysipelotrichaceae; g__Dubosiella; s__uncultured_bacterium_g__Dubosiella; OTU103	0.00868821	8.55981e-05	0.136786	0	0	0.0297453	0.0467366	0.0100578	0.0046651	0.00089878	0.00184036	0.00719024	0.00175476	0	0	0	0	0.00851701	0.111892		0.0650974	0.0162208
d__Bacteria; k__norank_d__Bacteria; p__Bacteroidota; c__Bacteroidia; o__Bacteroidales; f__Muribaculaceae; g__norank_f__Muribaculaceae; s__uncultured_bacterium_g__norank_f__Muribaculaceae; OTU592	0.034496	0.0458806	0.0128825	0.0214423	0.00415151	0.0214423	0.00958699	0.00483629	0.0190456	0.00680505	0.00188316	0.00368072	0.0153649	0.0183608	0.0044939	0.0044939	0.00505029	0.0233255	0.118474		0.0141237	0.0149369
d__Bacteria; k__norank_d__Bacteria; p__Firmicutes; c__Bacilli; o__Erysipelotrichales; f__Erysipelotrichaceae; g__Allobaculum; s__uncultured_bacterium_g__Allobaculum; OTU29	0.114659	0.0824738	0.000128397	0.0162636	0	0.0335973	0.00278194	0.000128397	0.000171196	0.00047079	0.00231115	4.27991e-05	0	0	0	0	0	0	0.00499899		0.00350952	0
d__Bacteria; k__norank_d__Bacteria; p__Desulfobacterota; c__Desulfovibrionia; o__Desulfovibrionales; f__Desulfovibrionaceae; g__Desulfovibrio; s__uncultured_bacterium_g__Desulfovibrio; OTU758	0.00552108	0.00667665	0.000128397	0.0557244	0.0044511	0.00406591	0.0335545	8.55981e-05	0.000299593	0.0163064	0.00389471	0.0627006	0.0115129	0.00393751	0.00530708	0.00355232	0.00359512	0.00539268	0.84896		0.0277338	0.00158357
d__Bacteria; k__norank_d__Bacteria; p__Bacteroidota; c__Bacteroidia; o__Bacteroidales; f__Prevotellaceae; g__Prevotellaceae_UCG-001; s__uncultured_bacterium_g__Prevotellaceae_UCG-001; OTU505	0.0262786	0.0210571	0	0.000299593	0	0.0304301	4.27991e-05	0	0.000513589	0	0	0.000171196	0.0335545	4.27991e-05	0	0	0	0.0443826	0.558035		4.27991e-05	0.0894072
d__Bacteria; k__norank_d__Bacteria; p__Firmicutes; c__Bacilli; o__Lactobacillales; f__Lactobacillaceae; g__Lactobacillus; s__Lactobacillus_intestinalis; OTU533	0	0	0.00184036	0	0.00278194	0	0.199272	0.00380912	4.27991e-05	0.00873101	0.000171196	0.00239675	0	4.27991e-05	0.00689065	4.27991e-05	0.000299593	0	0.0617545		0.00303873	0
d__Bacteria; k__norank_d__Bacteria; p__Bacteroidota; c__Bacteroidia; o__Bacteroidales; f__Muribaculaceae; g__norank_f__Muribaculaceae; s__uncultured_Bacteroidales_bacterium_g__norank_f__Muribaculaceae; OTU48	0.0718168	0.0892788	0.00813182	0.000641986	0.00089878	0.0222555	0.00573507	0.00338113	0.00265354	0.00106998	0	0.00821742	0.00333833	0.000599187	0.00102718	0.000385192	0.000941579	0.00136957	0.147743		0.00243955	0.00218275
d__Bacteria; k__norank_d__Bacteria; p__Bacteroidota; c__Bacteroidia; o__Bacteroidales; f__Muribaculaceae; g__norank_f__Muribaculaceae; s__uncultured_bacterium_g__norank_f__Muribaculaceae; OTU629	0.00543548	0.00564948	0.00201156	0.0223411	0.0133961	0.0411727	0.000342392	0	0.0269206	0.000128397	4.27991e-05	0.0124545	0.00372352	0.0232399	0.0496897	0.00158357	0.0043655	0.00723304	0.197922		0.00136957	0.0047507
d__Bacteria; k__norank_d__Bacteria; p__Firmicutes; c__Bacilli; o__Erysipelotrichales; f__Erysipelotrichaceae; g__Turicibacter; s__uncultured_bacterium_g__Turicibacter; OTU577	0.0326129	8.55981e-05	0.00560668	0	0	0.0193452	0.00838862	0.0801626	0.000427991	0.00933019	0.0204579	0.0298309	0	0	0	0	0	0	0.00527874		0.000213995	4.27991e-05
d__Bacteria; k__norank_d__Bacteria; p__Bacteroidota; c__Bacteroidia; o__Bacteroidales; f__Muribaculaceae; g__norank_f__Muribaculaceae; s__uncultured_Bacteroidales_bacterium_g__norank_f__Muribaculaceae; OTU818	0.0216991	0.0151937	0.00676225	0.000513589	0.00243955	0.0393323	0.000513589	0.000770383	0.00988658	0.000727584	8.55981e-05	0.0101006	0.00697625	0.0165632	0.0295741	0.00693345	0.00791783	0.0147657	0.118216		0.00808902	0.00693345
d__Bacteria; k__norank_d__Bacteria; p__Bacteroidota; c__Bacteroidia; o__Bacteroidales; f__Muribaculaceae; g__norank_f__Muribaculaceae; s__uncultured_bacterium_g__norank_f__Muribaculaceae; OTU699	0.00543548	0.00633426	0.020244	0.0043227	4.27991e-05	0.0859833	0	0	0.0203296	0.000599187	0.000599187	0.00415151	0.00243955	0.00162636	0.00166916	0.000299593	0.00710464	0.011299	0.223092		0.00132677	0.0313289
d__Bacteria; k__norank_d__Bacteria; p__Bacteroidota; c__Bacteroidia; o__Bacteroidales; f__Muribaculaceae; g__norank_f__Muribaculaceae; s__uncultured_bacterium_g__norank_f__Muribaculaceae; OTU276	0.00154077	0.00243955	0.00500749	8.55981e-05	0.00231115	0.00209715	0	0	0.00231115	0.000342392	0	0.00111278	0.00419431	0.112091	0.0124545	0.0044083	0.0395891	0.00316713	0.00259743		0.000556388	0.00136957
d__Bacteria; k__norank_d__Bacteria; p__Bacteroidota; c__Bacteroidia; o__Bacteroidales; f__Prevotellaceae; g__Prevotellaceae_UCG-001; s__uncultured_bacterium_g__Prevotellaceae_UCG-001; OTU288	0	4.27991e-05	0.00753263	0.000213995	0.00650546	0	0.000213995	4.27991e-05	0.0491761	0	0	8.55981e-05	0	0.0396747	0.0469934	0.0338969	0.000427991	0	0.633808		0	0
d__Bacteria; k__norank_d__Bacteria; p__Firmicutes; c__Clostridia; o__Lachnospirales; f__Lachnospiraceae; g__Lachnospiraceae_NK4A136_group; s__uncultured_bacterium_g__Lachnospiraceae_NK4A136_group; OTU340	0.000427991	0.00774663	0.000556388	0.0165632	0.00509309	0.0298309	0	0.00184036	0	0.0107854	4.27991e-05	0.000813182	0.00179756	0.00115557	0.00599187	0.00877381	0.00624866	0.0533704	0.139067		0.000171196	0.0236679
d__Bacteria; k__norank_d__Bacteria; p__Bacteroidota; c__Bacteroidia; o__Bacteroidales; f__Muribaculaceae; g__norank_f__Muribaculaceae; s__uncultured_bacterium_g__norank_f__Muribaculaceae; OTU624	0.00723304	0.00359512	0.00376632	0.00530708	0.00119837	0.0139097	0.000213995	0.00552108	0.0377916	0.00102718	0.000342392	0.00303873	0.00398031	0.00633426	0.0279478	0.00633426	0.00338113	0.018318	0.202272		0.000213995	0.0241815
d__Bacteria; k__norank_d__Bacteria; p__Bacteroidota; c__Bacteroidia; o__Bacteroidales; f__Muribaculaceae; g__norank_f__Muribaculaceae; s__uncultured_bacterium_g__norank_f__Muribaculaceae; OTU826	0.00141237	0.00539268	0.00205435	0.0540552	4.27991e-05	0.00834582	0.00338113	0.00423711	0.0173764	0.00166916	0.000513589	0.0137813	0.00363792	0.000599187	0.000641986	4.27991e-05	8.55981e-05	0.00958699	0.338087		0.0237107	0.0141665
d__Bacteria; k__norank_d__Bacteria; p__Bacteroidota; c__Bacteroidia; o__Bacteroidales; f__Muribaculaceae; g__norank_f__Muribaculaceae; s__uncultured_Bacteroidales_bacterium_g__norank_f__Muribaculaceae; OTU628	0	4.27991e-05	0.00723304	0	0.00423711	0	0.000855981	0.000727584	0.0135245	0.000427991	0.000171196	0.00115557	0.0140381	0.0469934	0.00201156	0.0192168	0.00637706	0.00136957	0.0237402		0.0381768	0.00218275
d__Bacteria; k__norank_d__Bacteria; p__Bacteroidota; c__Bacteroidia; o__Bacteroidales; f__Muribaculaceae; g__norank_f__Muribaculaceae; s__uncultured_bacterium_g__norank_f__Muribaculaceae; OTU83	0.0201156	0.0106998	0.00582067	0.00406591	0.0138241	0.0127113	0.000641986	0.00637706	0.00624866	0.00423711	4.27991e-05	0.00102718	0.000342392	0.0203296	0.00308153	0.00723304	0.0245667	0.0043227	0.121103		0.000256794	0.00218275
d__Bacteria; k__norank_d__Bacteria; p__Firmicutes; c__Bacilli; o__Lactobacillales; f__Streptococcaceae; g__Streptococcus; s__unclassified_g__Streptococcus; OTU717	8.55981e-05	4.27991e-05	0.000342392	0	0.000599187	8.55981e-05	0.0044939	0.000128397	0.000941579	0.000213995	0.109223	0.000342392	0.000256794	0.000128397	0.000813182	0.00047079	0.000727584	0.000213995	0.0723429		0.026193	0.000171196
d__Bacteria; k__norank_d__Bacteria; p__Firmicutes; c__Clostridia; o__Lachnospirales; f__Lachnospiraceae; g__unclassified_f__Lachnospiraceae; s__unclassified_f__Lachnospiraceae; OTU397	0.00945859	0.0240103	0	0.0288894	0	0	0	0	0	4.27991e-05	0	0.000513589	0	4.27991e-05	0.00162636	4.27991e-05	0.0719024	0	0.426699		0	0
d__Bacteria; k__norank_d__Bacteria; p__Bacteroidota; c__Bacteroidia; o__Bacteroidales; f__Muribaculaceae; g__norank_f__Muribaculaceae; s__unclassified_g__norank_f__Muribaculaceae; OTU312	0	0	0.000299593	0	0.0154077	0	8.55981e-05	0.0172908	0.00637706	0.00320993	0	0.00355232	0	0.00410871	0.0439974	0.00111278	0.0395463	0	0.26006		0.000171196	0
d__Bacteria; k__norank_d__Bacteria; p__Bacteroidota; c__Bacteroidia; o__Bacteroidales; f__Muribaculaceae; g__norank_f__Muribaculaceae; s__uncultured_bacterium_g__norank_f__Muribaculaceae; OTU750	0	0	0.00761823	0	0.000342392	4.27991e-05	0.0044083	0.0125401	0.00299593	0.00748984	4.27991e-05	0.0565376	0.00564948	0.0104858	0.000813182	0.00106998	0.00612027	0.00526428	0.0544093		8.55981e-05	0.00239675
d__Bacteria; k__norank_d__Bacteria; p__Firmicutes; c__Clostridia; o__Lachnospirales; f__Lachnospiraceae; g__Lachnospiraceae_NK4A136_group; s__uncultured_bacterium_g__Lachnospiraceae_NK4A136_group; OTU216	0.00106998	0.00646266	0.0045367	0.00239675	0.000641986	0.019174	8.55981e-05	0.00102718	0	0.00483629	4.27991e-05	0.00132677	0.00406591	0.000984378	0.00295314	0.000599187	0.00505029	0.0410443	0.142649		4.27991e-05	0.0259362
d__Bacteria; k__norank_d__Bacteria; p__Bacteroidota; c__Bacteroidia; o__Bacteroidales; f__Muribaculaceae; g__norank_f__Muribaculaceae; s__uncultured_bacterium_g__norank_f__Muribaculaceae; OTU208	0.00380912	0.0045367	0.00941579	8.55981e-05	0.00188316	0.00500749	4.27991e-05	0.00166916	0.0091162	4.27991e-05	4.27991e-05	0.000342392	0.00166916	0.0134389	0.0210571	0.0186604	0.00868821	0.0092874	0.0161147		0	0.00748984
d__Bacteria; k__norank_d__Bacteria; p__Firmicutes; c__Clostridia; o__Lachnospirales; f__Lachnospiraceae; g__unclassified_f__Lachnospiraceae; s__unclassified_f__Lachnospiraceae; OTU376	0.00513589	0.00731864	0	0.00299593	0	0	0	0	0	0	4.27991e-05	0	0	0.00804622	0	0.0924032	0	0	0.428125		0	0
d__Bacteria; k__norank_d__Bacteria; p__Bacteroidota; c__Bacteroidia; o__Bacteroidales; f__Muribaculaceae; g__Muribaculum; s__uncultured_bacterium_g__Muribaculum; OTU22	0.0359512	0.00796062	0.00141237	0.000684785	0.000128397	0.0139525	4.27991e-05	0.0107854	0.00226835	0.000855981	0.000128397	0.00132677	0.0114701	0.00235395	0.00149797	0.00213995	0.00149797	0.00757543	0.289134		4.27991e-05	0.0123689
d__Bacteria; k__norank_d__Bacteria; p__Patescibacteria; c__Saccharimonadia; o__Saccharimonadales; f__Saccharimonadaceae; g__Candidatus_Saccharimonas; s__uncultured_bacterium_g__Candidatus_Saccharimonas; OTU686	0.000128397	0.000342392	0.000299593	0.000855981	0.00106998	0.000171196	0.0234539	0.00393751	0.000213995	0.0659961	8.55981e-05	0.00761823	8.55981e-05	0.00393751	0.00175476	0.00201156	0.00141237	4.27991e-05	0.235173		8.55981e-05	0
d__Bacteria; k__norank_d__Bacteria; p__Bacteroidota; c__Bacteroidia; o__Bacteroidales; f__Muribaculaceae; g__norank_f__Muribaculaceae; s__uncultured_bacterium_g__norank_f__Muribaculaceae; OTU622	0	4.27991e-05	0.0929168	0	0	0	0.000299593	0.00308153	0.00415151	0.000513589	4.27991e-05	0.010015	0	0	0	0	0	0	0.00546312		0.000513589	0
d__Bacteria; k__norank_d__Bacteria; p__Actinobacteriota; c__Actinobacteria; o__Bifidobacteriales; f__Bifidobacteriaceae; g__Bifidobacterium; s__Bifidobacterium_animalis; OTU795	0.00243955	0.0124117	0.00192596	0.00205435	0	0.00209715	0.0308153	0.00333833	0.000941579	0.0106998	0.000128397	0.0046223	0.000256794	0	0	0	0	0.000984378	0.0193133		0.0279906	0.00205435
d__Bacteria; k__norank_d__Bacteria; p__Bacteroidota; c__Bacteroidia; o__Bacteroidales; f__Muribaculaceae; g__norank_f__Muribaculaceae; s__uncultured_bacterium_g__norank_f__Muribaculaceae; OTU618	0.000427991	0.00325273	0.00868821	0.00838862	0.000256794	0.00761823	8.55981e-05	0.00826022	0.0118125	0.00659105	0.000213995	0.01682	0.000213995	0.0126685	0.000599187	0.00213995	0.00132677	0.00492189	0.823127		0.000342392	0.00659105
d__Bacteria; k__norank_d__Bacteria; p__Firmicutes; c__Clostridia; o__Oscillospirales; f__Oscillospiraceae; g__unclassified_f__Oscillospiraceae; s__unclassified_f__Oscillospiraceae; OTU320	0.00256794	0.00522149	0.000599187	0.00333833	0.00500749	0.000171196	0.000342392	0.000513589	4.27991e-05	8.55981e-05	4.27991e-05	0	0.000213995	0.0205863	0.0233255	0.00864541	0.0292318	8.55981e-05	0.0179794		0	0.000513589
d__Bacteria; k__norank_d__Bacteria; p__Bacteroidota; c__Bacteroidia; o__Bacteroidales; f__Muribaculaceae; g__norank_f__Muribaculaceae; s__uncultured_bacterium_g__norank_f__Muribaculaceae; OTU830	0	4.27991e-05	0.0557244	0	0	0	0.00659105	0.00372352	0.0117697	0.000641986	0.000171196	0.0174192	0	0	0	0	0	0	0.00485203		0.00252514	0
d__Bacteria; k__norank_d__Bacteria; p__Firmicutes; c__Clostridia; o__Lachnospirales; f__Lachnospiraceae; g__Roseburia; s__mouse_gut_metagenome_g__Roseburia; OTU158	0	0.0167772	0	0.0774235	0	0	0.000213995	8.55981e-05	0	0	0	0	0	4.27991e-05	4.27991e-05	0	0	0	0.875516		0	0
d__Bacteria; k__norank_d__Bacteria; p__Bacteroidota; c__Bacteroidia; o__Bacteroidales; f__Muribaculaceae; g__norank_f__Muribaculaceae; s__uncultured_bacterium_g__norank_f__Muribaculaceae; OTU76	0.0160068	0.0187888	8.55981e-05	0.00868821	0.000128397	0.00586347	0.00188316	0.00590627	0.000299593	0.00355232	0.000171196	0.00573507	0.00487909	0.000171196	0.000385192	0.00166916	0.000171196	0.009159	0.674734		0.000299593	0.0047079
d__Bacteria; k__norank_d__Bacteria; p__Firmicutes; c__Clostridia; o__Lachnospirales; f__Lachnospiraceae; g__Lachnoclostridium; s__Dorea_sp._5-2; OTU507	0.00359512	0.00136957	0.00145517	0.00111278	0.00513589	0.00213995	0.00106998	0.000128397	0.000427991	4.27991e-05	0.000128397	0.00115557	0.000941579	0.00774663	0.00877381	0.00282474	0.00303873	0.0219131	0.00603284		0.000299593	0.0246095
d__Bacteria; k__norank_d__Bacteria; p__Bacteroidota; c__Bacteroidia; o__Bacteroidales; f__Muribaculaceae; g__norank_f__Muribaculaceae; s__uncultured_bacterium_g__norank_f__Muribaculaceae; OTU573	0	0	0	0	0	0	0.00089878	0.072844	0	0.000213995	0	0.00124117	0	0	0	0	0	0	0.00854298		0	0
d__Bacteria; k__norank_d__Bacteria; p__Bacteroidota; c__Bacteroidia; o__Bacteroidales; f__Muribaculaceae; g__norank_f__Muribaculaceae; s__uncultured_bacterium_g__norank_f__Muribaculaceae; OTU722	0.000299593	0.000556388	0.000770383	0.00196876	0.000599187	0.00766103	0.000599187	0.00714744	0.0101006	0.00325273	0.000513589	0.00132677	0.00603467	0.00235395	0.00102718	0.000213995	0	0.00945859	0.643706		0.00106998	0.01682
d__Bacteria; k__norank_d__Bacteria; p__Bacteroidota; c__Bacteroidia; o__Bacteroidales; f__Muribaculaceae; g__norank_f__Muribaculaceae; s__uncultured_Bacteroidales_bacterium_g__norank_f__Muribaculaceae; OTU77	0.00706184	0.00783223	0.00196876	0.00145517	0.00607747	0.00124117	4.27991e-05	8.55981e-05	0.00808902	0.000342392	0.00047079	0.000299593	0.000770383	0.00312433	0.0132677	0.000256794	0.00179756	0.00218275	0.103415		0.0122405	0.00154077
d__Bacteria; k__norank_d__Bacteria; p__Firmicutes; c__Bacilli; o__Erysipelotrichales; f__Erysipelotrichaceae; g__Ileibacterium; s__Ileibacterium_valens; OTU835	0	0	0.0259362	0	0	0	0.00770383	0.0112134	0.000299593	0.0188316	0.000171196	0.00124117	0	0	0	0	0	0	0.00461164		0.0045367	0
d__Bacteria; k__norank_d__Bacteria; p__Firmicutes; c__Bacilli; o__Lactobacillales; f__Lactobacillaceae; g__Lactobacillus; s__uncultured_bacterium_g__Lactobacillus; OTU532	4.27991e-05	4.27991e-05	0.00047079	0	0.010015	0.000256794	0.00333833	0.00166916	0.0252514	0.00269634	4.27991e-05	0.0195164	4.27991e-05	8.55981e-05	0.00291034	0.000513589	8.55981e-05	0.00047079	0.112317		0.00179756	0.000213995
d__Bacteria; k__norank_d__Bacteria; p__Bacteroidota; c__Bacteroidia; o__Bacteroidales; f__Rikenellaceae; g__Alistipes; s__uncultured_bacterium_g__Alistipes; OTU181	0.000770383	0.00355232	0	8.55981e-05	0.00325273	0.00188316	0	0	0	0	0	0	0	0.00616306	0.00265354	0.0175048	0.0334261	0	0.0239675		8.55981e-05	0
d__Bacteria; k__norank_d__Bacteria; p__Bacteroidota; c__Bacteroidia; o__Bacteroidales; f__Muribaculaceae; g__norank_f__Muribaculaceae; s__uncultured_bacterium_g__norank_f__Muribaculaceae; OTU211	0.00710464	0.0046651	0.00534988	0.000385192	0.000256794	0.0169484	0	0.000855981	0.000213995	0.000813182	4.27991e-05	0.00804622	0.00560668	0.0100578	8.55981e-05	0.000213995	0.00239675	0.00209715	0.249359		4.27991e-05	0.00359512
d__Bacteria; k__norank_d__Bacteria; p__Firmicutes; c__Clostridia; o__Lachnospirales; f__Lachnospiraceae; g__Marvinbryantia; s__uncultured_bacterium_g__Marvinbryantia; OTU46	0.0271346	0.00492189	4.27991e-05	0.00958699	0.00188316	0.00308153	0.000128397	0	0.00543548	0	8.55981e-05	0	0	0.0133105	0.000427991	0.00162636	0	0	0.0852878		4.27991e-05	0
d__Bacteria; k__norank_d__Bacteria; p__Firmicutes; c__Clostridia; o__Lachnospirales; f__Lachnospiraceae; g__Lachnospiraceae_NK4A136_group; s__uncultured_bacterium_g__Lachnospiraceae_NK4A136_group; OTU1	0.0314145	0.00389471	0.00188316	0.00192596	0	4.27991e-05	0.000770383	0.00629146	0	0.00599187	4.27991e-05	0.00124117	0	0	0.00962979	0	0.000171196	4.27991e-05	0.350154		4.27991e-05	8.55981e-05
d__Bacteria; k__norank_d__Bacteria; p__Firmicutes; c__Clostridia; o__Lachnospirales; f__Lachnospiraceae; g__Roseburia; s__uncultured_bacterium_g__Roseburia; OTU299	0.000342392	0.000171196	4.27991e-05	0.000171196	0.000171196	0	0	0	4.27991e-05	0	8.55981e-05	0	0	0.000641986	0.0600471	0.000641986	0.000256794	0	0.0810136		0	0
d__Bacteria; k__norank_d__Bacteria; p__Firmicutes; c__Clostridia; o__Oscillospirales; f__Ruminococcaceae; g__Ruminococcus; s__unclassified_g__Ruminococcus; OTU116	0	0	0.0116413	0	0	0	0.000128397	0	0.00102718	0	0	0	0.0153649	0.000599187	0.000385192	0.00196876	0.00552108	0	0.0680791		0	0.0218703
d__Bacteria; k__norank_d__Bacteria; p__Actinobacteriota; c__Coriobacteriia; o__Coriobacteriales; f__Atopobiaceae; g__Coriobacteriaceae_UCG-002; s__uncultured_bacterium_g__Coriobacteriaceae_UCG-002; OTU226	0.000171196	0	0.000599187	0	0	0.00385192	0.000941579	0.00166916	0.00261074	0.00363792	0	0.000385192	0.00089878	0	0	0	0	8.55981e-05	0.0992725		0.0423283	0.00047079
d__Bacteria; k__norank_d__Bacteria; p__Firmicutes; c__Bacilli; o__Lactobacillales; f__Lactobacillaceae; g__Lactobacillus; s__uncultured_bacterium_g__Lactobacillus; OTU616	0	4.27991e-05	0.000213995	0	0.00997218	4.27991e-05	0.00303873	0.00239675	0.0205435	0.00196876	0	0.0141237	8.55981e-05	8.55981e-05	0.00196876	0.000513589	0.000171196	0.000342392	0.0868922		0.00162636	0.000171196
d__Bacteria; k__norank_d__Bacteria; p__Bacteroidota; c__Bacteroidia; o__Bacteroidales; f__Muribaculaceae; g__norank_f__Muribaculaceae; s__uncultured_Bacteroidales_bacterium_g__norank_f__Muribaculaceae; OTU644	0.000213995	0.00145517	0.0237963	0.000599187	0.00231115	0	8.55981e-05	0.00089878	0.000513589	4.27991e-05	0	0.00667665	0.00106998	0.0046651	0.00132677	0.00355232	0.00115557	0.00526428	0.157951		0	0.00346672
d__Bacteria; k__norank_d__Bacteria; p__Firmicutes; c__Clostridia; o__Lachnospirales; f__Lachnospiraceae; g__A2; s__uncultured_bacterium_g__A2; OTU399	0.000128397	0.00543548	0	0.00231115	0.000727584	4.27991e-05	4.27991e-05	0	0.000599187	0	0	0	0	0	0.000727584	0.00312433	0.0414295	8.55981e-05	0.138124		8.55981e-05	0.000256794
d__Bacteria; k__norank_d__Bacteria; p__Bacteroidota; c__Bacteroidia; o__Bacteroidales; f__Prevotellaceae; g__Prevotellaceae_NK3B31_group; s__uncultured_bacterium_g__Prevotellaceae_NK3B31_group; OTU475	0	0	0	0	0	0	0	0	0	0	0	0	0.0186604	0	0	0	0	0.0190456	0.120314		4.27991e-05	0.0149797
d__Bacteria; k__norank_d__Bacteria; p__Proteobacteria; c__Gammaproteobacteria; o__Enterobacterales; f__Enterobacteriaceae; g__Escherichia-Shigella; s__Escherichia_coli_g__Escherichia-Shigella; OTU704	0	4.27991e-05	0	0	0	0	0.000128397	4.27991e-05	0.000342392	8.55981e-05	0.0217847	0	0	4.27991e-05	0	0	0	0	0.0114189		0.0301733	0
d__Bacteria; k__norank_d__Bacteria; p__Bacteroidota; c__Bacteroidia; o__Bacteroidales; f__Muribaculaceae; g__norank_f__Muribaculaceae; s__uncultured_bacterium_g__norank_f__Muribaculaceae; OTU241	0	0	0	0	0	0	0	0	0	0	0	0	0.0412583	0	0	0	0	0.00359512	0.120314		4.27991e-05	0.00659105
d__Bacteria; k__norank_d__Bacteria; p__Proteobacteria; c__Gammaproteobacteria; o__Burkholderiales; f__Sutterellaceae; g__Parasutterella; s__uncultured_bacterium_g__Parasutterella; OTU124	0.000513589	0.00132677	0.0420287	0	0	0.000342392	0	0.000342392	0.00102718	0.000299593	0.000770383	0	0.00132677	0	0	0	0	0.00128397	0.639146		0	0.00184036
d__Bacteria; k__norank_d__Bacteria; p__Bacteroidota; c__Bacteroidia; o__Bacteroidales; f__Rikenellaceae; g__Alistipes; s__uncultured_bacterium_g__Alistipes; OTU494	0.00530708	0.00261074	0	8.55981e-05	0	0.00723304	4.27991e-05	0.00047079	0	0.000128397	0	0	0.00320993	0	0	0	0	0.0183608	0.537552		4.27991e-05	0.0127541
d__Bacteria; k__norank_d__Bacteria; p__Firmicutes; c__Clostridia; o__Oscillospirales; f__Eubacterium_coprostanoligenes_group; g__norank_f__Eubacterium_coprostanoligenes_group; s__gut_metagenome_g__norank_f__Eubacterium_coprostanoligenes_group; OTU247	0.0231543	0.00222555	4.27991e-05	0.00047079	0	0.00089878	0	0	0.000427991	0.000128397	4.27991e-05	0	0.0122405	0.0044083	0.00089878	0.00089878	0.000513589	0.00162636	0.0138058		0	0.00179756
d__Bacteria; k__norank_d__Bacteria; p__Firmicutes; c__Bacilli; o__Erysipelotrichales; f__Erysipelotrichaceae; g__Allobaculum; s__uncultured_bacterium_g__Allobaculum; OTU599	0	0	0	0	0	0	0	0.046009	0	0.00261074	0	0	0	0	0	0	0	0	0.120314		0	0
d__Bacteria; k__norank_d__Bacteria; p__Bacteroidota; c__Bacteroidia; o__Bacteroidales; f__Muribaculaceae; g__norank_f__Muribaculaceae; s__uncultured_bacterium_g__norank_f__Muribaculaceae; OTU593	0	0	0	0	0	0	0.000513589	0.0285042	0	0.0104002	0	0.00885941	0	0	0	0	0	0	0.00854298		0	0
d__Bacteria; k__norank_d__Bacteria; p__Firmicutes; c__Clostridia; o__Lachnospirales; f__Lachnospiraceae; g__norank_f__Lachnospiraceae; s__unclassified_g__norank_f__Lachnospiraceae; OTU664	0	0	0.000299593	0.000599187	0.00312433	4.27991e-05	0.000427991	0.00179756	0	0.0383908	0	0.000427991	0.000641986	0.000128397	0.000513589	0	8.55981e-05	0.000599187	0.864929		0	0.000813182
d__Bacteria; k__norank_d__Bacteria; p__Proteobacteria; c__Gammaproteobacteria; o__Enterobacterales; f__Enterobacteriaceae; g__Enterobacter; s__unclassified_g__Enterobacter; OTU713	0	4.27991e-05	0	0	0	0	0	0	0	4.27991e-05	0.0471218	0	0.000213995	0.000128397	0	4.27991e-05	0	0	0.431357		8.55981e-05	0
d__Bacteria; k__norank_d__Bacteria; p__Bacteroidota; c__Bacteroidia; o__Bacteroidales; f__Muribaculaceae; g__norank_f__Muribaculaceae; s__uncultured_Bacteroidales_bacterium_g__norank_f__Muribaculaceae; OTU54	0.00552108	0.00299593	0.000128397	8.55981e-05	0.00333833	0.00582067	4.27991e-05	0.000128397	0.00136957	0.000171196	8.55981e-05	8.55981e-05	0.00132677	0.00158357	0.00967259	0.00346672	0.00372352	0.00513589	0.0213051		0.000427991	0.00171196
d__Bacteria; k__norank_d__Bacteria; p__Campilobacterota; c__Campylobacteria; o__Campylobacterales; f__Helicobacteraceae; g__Helicobacter; s__Helicobacter_ganmani; OTU362	0.000128397	0.00372352	0	0.00252514	0	0.00303873	0.000213995	0	4.27991e-05	0.000128397	4.27991e-05	4.27991e-05	0	0.00410871	0.000299593	0.0186176	0.0138669	0	0.405788		0	0
d__Bacteria; k__norank_d__Bacteria; p__Bacteroidota; c__Bacteroidia; o__Bacteroidales; f__Muribaculaceae; g__norank_f__Muribaculaceae; s__unclassified_g__norank_f__Muribaculaceae; OTU10	0.00372352	0.0140381	0	0.00783223	0	0.00834582	0	0	0	4.27991e-05	0	0	0.00308153	0	0	0	0	0.00594907	0.0855346		0	0.00346672
d__Bacteria; k__norank_d__Bacteria; p__Bacteroidota; c__Bacteroidia; o__Bacteroidales; f__Muribaculaceae; g__norank_f__Muribaculaceae; s__unclassified_g__norank_f__Muribaculaceae; OTU322	0	0	0.00132677	0	0.00612027	0	0.00162636	0	0.00560668	0.000984378	4.27991e-05	0.000427991	0	0.00089878	0.0150225	0.00577787	0.00312433	0	0.483755		0.00534988	0
d__Bacteria; k__norank_d__Bacteria; p__Bacteroidota; c__Bacteroidia; o__Bacteroidales; f__Bacteroidaceae; g__Bacteroides; s__Bacteroides_acidifaciens; OTU650	0.00333833	0.00308153	0.0044939	0.000556388	0.00308153	0.00646266	0.000213995	0.00089878	0.00303873	0.000941579	0.000213995	8.55981e-05	0.00201156	0.00380912	0.00372352	0.00265354	0.000984378	0.00560668	0.0187048		4.27991e-05	0.000855981
d__Bacteria; k__norank_d__Bacteria; p__Bacteroidota; c__Bacteroidia; o__Bacteroidales; f__Muribaculaceae; g__norank_f__Muribaculaceae; s__uncultured_bacterium_g__norank_f__Muribaculaceae; OTU625	0.00252514	0.00329553	0.00119837	0.000513589	0.00106998	0.000599187	0	8.55981e-05	0.00342392	4.27991e-05	4.27991e-05	4.27991e-05	0.000128397	0.0207147	0.00303873	0.00115557	0.00547828	0.00047079	0.0483131		0.000256794	0.00141237
d__Bacteria; k__norank_d__Bacteria; p__Bacteroidota; c__Bacteroidia; o__Bacteroidales; f__Muribaculaceae; g__norank_f__Muribaculaceae; s__unclassified_g__norank_f__Muribaculaceae; OTU210	0.00398031	0.0136101	0	0.00646266	0	0.00830302	0	0	0	4.27991e-05	0	4.27991e-05	0.00286754	0	0	0	0	0.00659105	0.16892		0	0.00355232
d__Bacteria; k__norank_d__Bacteria; p__Bacteroidota; c__Bacteroidia; o__Bacteroidales; f__Rikenellaceae; g__Rikenellaceae_RC9_gut_group; s__unclassified_g__Rikenellaceae_RC9_gut_group; OTU25	0.00124117	0.00637706	4.27991e-05	4.27991e-05	4.27991e-05	0.036208	0	8.55981e-05	0.000385192	0.000128397	0	0.000342392	0	4.27991e-05	0	0	0.000171196	0	0.0745945		0	0
d__Bacteria; k__norank_d__Bacteria; p__Bacteroidota; c__Bacteroidia; o__Bacteroidales; f__Muribaculaceae; g__norank_f__Muribaculaceae; s__uncultured_bacterium_g__norank_f__Muribaculaceae; OTU323	0.00406591	0.00119837	0.00368072	8.55981e-05	0.000342392	0.00239675	0.00243955	0.00496469	0.00295314	0.00303873	4.27991e-05	0.00102718	0.0043227	0.00316713	0.00278194	0.00201156	0.00145517	0.00235395	0.777663		0.000213995	0.00205435
d__Bacteria; k__norank_d__Bacteria; p__Bacteroidota; c__Bacteroidia; o__Bacteroidales; f__Muribaculaceae; g__norank_f__Muribaculaceae; s__uncultured_bacterium_g__norank_f__Muribaculaceae; OTU772	0	4.27991e-05	0.00175476	0	0.000171196	0	0.000641986	4.27991e-05	0.010443	0.00047079	0	0.00166916	0	0.00689065	0.00132677	0.0181468	0.000342392	0	0.358281		0.00213995	0
d__Bacteria; k__norank_d__Bacteria; p__Firmicutes; c__Clostridia; o__Oscillospirales; f__Oscillospiraceae; g__Oscillibacter; s__unclassified_g__Oscillibacter; OTU453	0.00286754	0.00196876	0.000599187	0.000684785	0.00342392	0.000385192	0	0.000171196	0	0	0	0	0.00149797	0.00205435	0.00192596	0.0106998	0.0146373	0.000770383	0.00225052		0	0.00205435
d__Bacteria; k__norank_d__Bacteria; p__Firmicutes; c__Clostridia; o__Lachnospirales; f__Lachnospiraceae; g__Lachnospiraceae_UCG-006; s__uncultured_bacterium_g__Lachnospiraceae_UCG-006; OTU172	0.000684785	0.000128397	0.00239675	8.55981e-05	0.00299593	0.000171196	0.000256794	0.00047079	0.000213995	4.27991e-05	0.000171196	0.000128397	0	0.00124117	0.0224267	0.00389471	0.00693345	0.000342392	0.180661		0.000128397	4.27991e-05
d__Bacteria; k__norank_d__Bacteria; p__Firmicutes; c__Clostridia; o__Lachnospirales; f__Lachnospiraceae; g__Lachnospiraceae_UCG-001; s__uncultured_bacterium_g__Lachnospiraceae_UCG-001; OTU108	0.00291034	0.0392895	4.27991e-05	0	0	0	0	0	0	0	0	0	0	0	0	0	0.000342392	0	0.112406		0	0
d__Bacteria; k__norank_d__Bacteria; p__Firmicutes; c__Clostridia; o__Lachnospirales; f__Lachnospiraceae; g__unclassified_f__Lachnospiraceae; s__unclassified_f__Lachnospiraceae; OTU184	0.00333833	0.00102718	0.000427991	0.00162636	0.00620586	0.000513589	0.000171196	0	0.000641986	0	8.55981e-05	0	0.000770383	0.00586347	0.00821742	0.00213995	0.00205435	0.00522149	0.00382254		0	0.00419431
d__Bacteria; k__norank_d__Bacteria; p__Firmicutes; c__Clostridia; o__Oscillospirales; f__Ruminococcaceae; g__Anaerotruncus; s__uncultured_bacterium_g__Anaerotruncus; OTU154	0.000770383	0.000941579	0.000256794	0.008945	0.00517869	0.000385192	4.27991e-05	0.000299593	0.000171196	0	4.27991e-05	0	0.000813182	0.00252514	0.00748984	0.00710464	0.00641986	0.000599187	0.00358317		4.27991e-05	0.000213995
d__Bacteria; k__norank_d__Bacteria; p__Bacteroidota; c__Bacteroidia; o__Bacteroidales; f__Muribaculaceae; g__norank_f__Muribaculaceae; s__uncultured_Bacteroidales_bacterium_g__norank_f__Muribaculaceae; OTU615	0	0	0.0250374	0	0	0	0.00213995	0.000128397	0.00243955	0.000213995	0	0.00945859	0	0	0	0	0	0	0.0181444		0.00218275	0
d__Bacteria; k__norank_d__Bacteria; p__Firmicutes; c__Clostridia; o__Lachnospirales; f__Lachnospiraceae; g__unclassified_f__Lachnospiraceae; s__unclassified_f__Lachnospiraceae; OTU230	0.000556388	0.000556388	0.000299593	0.00363792	8.55981e-05	0.000813182	0.000727584	0.000684785	4.27991e-05	0.000427991	0	8.55981e-05	0.00256794	0.0178044	0.00149797	0.00149797	0.00624866	0.00136957	0.00650885		0	0.00128397
d__Bacteria; k__norank_d__Bacteria; p__Firmicutes; c__Clostridia; o__Lachnospirales; f__Lachnospiraceae; g__Lachnospiraceae_NK4A136_group; s__unclassified_g__Lachnospiraceae_NK4A136_group; OTU14	0.0315857	4.27991e-05	0.00680505	0	0	0	0.000256794	0.00102718	0	4.27991e-05	0	0	0	0	0	0	0	0	0.12844		0	0
d__Bacteria; k__norank_d__Bacteria; p__Bacteroidota; c__Bacteroidia; o__Bacteroidales; f__Rikenellaceae; g__Rikenella; s__Rikenella_microfusus_DSM_15922; OTU183	0	0	0.000641986	0	0.0120265	0	0	8.55981e-05	0.000342392	0	0.000128397	8.55981e-05	0	0.00385192	0.00997218	0.00483629	0.00774663	0	0.387237		0	0
d__Bacteria; k__norank_d__Bacteria; p__Firmicutes; c__Clostridia; o__Oscillospirales; f__Oscillospiraceae; g__unclassified_f__Oscillospiraceae; s__unclassified_f__Oscillospiraceae; OTU225	0.00175476	0.00261074	0.000855981	0.00261074	0.00205435	0.00500749	0.000213995	0.000427991	4.27991e-05	8.55981e-05	4.27991e-05	0	0.00162636	0.00171196	0.00505029	0.00997218	0.00325273	0.000599187	0.00333986		4.27991e-05	0.00175476
d__Bacteria; k__norank_d__Bacteria; p__Firmicutes; c__Clostridia; o__Lachnospirales; f__Lachnospiraceae; g__Lachnospiraceae_NK4A136_group; s__uncultured_bacterium_g__Lachnospiraceae_NK4A136_group; OTU410	0.00338113	0.00599187	0	0.00654826	0	0	0	0	0	4.27991e-05	0	4.27991e-05	0	4.27991e-05	0.000299593	4.27991e-05	0.0231115	0	0.368026		0	0
d__Bacteria; k__norank_d__Bacteria; p__Firmicutes; c__Clostridia; o__Lachnospirales; f__Lachnospiraceae; g__Lachnospiraceae_NK4A136_group; s__uncultured_bacterium_g__Lachnospiraceae_NK4A136_group; OTU39	0.0112134	8.55981e-05	0.00128397	4.27991e-05	0	4.27991e-05	0	0.000256794	0	0.000256794	0	0.00573507	0.000128397	0.0116413	0.000256794	0.00158357	0.00526428	0.000427991	0.156494		0	8.55981e-05
d__Bacteria; k__norank_d__Bacteria; p__Firmicutes; c__Clostridia; o__Lachnospirales; f__Lachnospiraceae; g__norank_f__Lachnospiraceae; s__unclassified_g__norank_f__Lachnospiraceae; OTU285	0.000213995	0.000256794	0.000427991	0.00106998	0.00175476	0.000385192	0.000641986	0.00175476	4.27991e-05	0.000727584	4.27991e-05	4.27991e-05	0.00295314	0.0150225	0.00877381	0.00102718	0.00111278	0.000556388	0.0450796		0	0.00106998
d__Bacteria; k__norank_d__Bacteria; p__Firmicutes; c__Clostridia; o__Oscillospirales; f__Oscillospiraceae; g__Colidextribacter; s__uncultured_bacterium_g__Colidextribacter; OTU513	0.00231115	0.0045367	0.00124117	0.00261074	0.00205435	0.00273914	0.000342392	0.000427991	0.000213995	0.000128397	4.27991e-05	4.27991e-05	0.00291034	0.00278194	0.00222555	0.00273914	0.00543548	0.00192596	0.00281376		0	0.00239675
d__Bacteria; k__norank_d__Bacteria; p__Firmicutes; c__Clostridia; o__Oscillospirales; f__Oscillospiraceae; g__Intestinimonas; s__uncultured_bacterium_g__Intestinimonas; OTU443	0.00291034	0.00676225	0.000941579	0.00273914	0.00175476	0.00141237	0.000128397	0.000256794	0	0.000128397	0	0	0.00166916	0.00256794	0.00594907	0.00179756	0.00513589	0.00188316	0.00313039		0	0.000641986
d__Bacteria; k__norank_d__Bacteria; p__Bacteroidota; c__Bacteroidia; o__Bacteroidales; f__Muribaculaceae; g__norank_f__Muribaculaceae; s__uncultured_bacterium_g__norank_f__Muribaculaceae; OTU55	0.00243955	0.00226835	0.000342392	0.000599187	0.000599187	0.0151937	0	0	0.00166916	4.27991e-05	0	0.000256794	0.00380912	0.000299593	0.00132677	0.000427991	0.000941579	0.00363792	0.0242109		0	0.00235395
d__Bacteria; k__norank_d__Bacteria; p__Campilobacterota; c__Campylobacteria; o__Campylobacterales; f__Helicobacteraceae; g__Helicobacter; s__Helicobacter_typhlonius; OTU179	0	0	4.27991e-05	0	0.0155361	0	0.000427991	0.000684785	0.000299593	0	4.27991e-05	0	0	0.00196876	0.0136101	0.00213995	0.000128397	0	0.443747		0	0
d__Bacteria; k__norank_d__Bacteria; p__Proteobacteria; c__Gammaproteobacteria; o__Burkholderiales; f__Sutterellaceae; g__Parasutterella; s__Burkholderiales_bacterium_YL45; OTU541	0.00316713	0.00213995	0	0	0	0.00954419	0.000128397	0	0	0.000213995	0	0	0.0089878	0	0	0	0	0.00218275	0.575629		0	0.00714744
d__Bacteria; k__norank_d__Bacteria; p__Firmicutes; c__Clostridia; o__Lachnospirales; f__Lachnospiraceae; g__GCA-900066575; s__uncultured_bacterium_g__GCA-900066575; OTU298	0.00308153	0.00333833	0	0.000513589	0.00697625	4.27991e-05	0	0.000128397	0.000128397	4.27991e-05	4.27991e-05	0	4.27991e-05	0	0.0179328	4.27991e-05	0.000385192	0.000128397	0.241787		0	0.000556388
d__Bacteria; k__norank_d__Bacteria; p__Firmicutes; c__Clostridia; o__Lachnospirales; f__Lachnospiraceae; g__Lachnospiraceae_NK4A136_group; s__uncultured_bacterium_g__Lachnospiraceae_NK4A136_group; OTU469	0.00158357	0.000427991	0	0.00380912	0	0.00398031	0	0	0	0	0	0	0.00265354	0	0	0	0	0.0109138	0.0886867		0	0.00967259
d__Bacteria; k__norank_d__Bacteria; p__Firmicutes; c__Clostridia; o__Lachnospirales; f__Lachnospiraceae; g__ASF356; s__uncultured_bacterium_g__ASF356; OTU352	4.27991e-05	0.000984378	0.00175476	8.55981e-05	0.00243955	0.000556388	0	4.27991e-05	0.000342392	0	0	4.27991e-05	4.27991e-05	0.00419431	0.00047079	0.00243955	0.0180184	0.000299593	0.0164987		8.55981e-05	0.000171196
d__Bacteria; k__norank_d__Bacteria; p__Proteobacteria; c__Gammaproteobacteria; o__Pseudomonadales; f__Moraxellaceae; g__Psychrobacter; s__unclassified_g__Psychrobacter; OTU745	0	0	0	0	0	4.27991e-05	4.27991e-05	0	0	8.55981e-05	0.0271346	0.000128397	0	0	0	0	0	0	0.0248693		0.00406591	0
d__Bacteria; k__norank_d__Bacteria; p__Firmicutes; c__Clostridia; o__Lachnospirales; f__Lachnospiraceae; g__Lachnospiraceae_NK4A136_group; s__uncultured_bacterium_g__Lachnospiraceae_NK4A136_group; OTU145	0.000641986	0.000984378	0.000556388	0.00564948	0.00119837	0.000256794	4.27991e-05	0.000299593	4.27991e-05	0.000213995	0	8.55981e-05	0	4.27991e-05	0.0118981	0.00252514	0.00629146	8.55981e-05	0.0755284		0.00047079	0
d__Bacteria; k__norank_d__Bacteria; p__Firmicutes; c__Clostridia; o__Lachnospirales; f__Lachnospiraceae; g__Lachnoclostridium; s__unclassified_g__Lachnoclostridium; OTU147	0.00047079	0.00243955	0.000299593	0.0199872	0.00136957	4.27991e-05	8.55981e-05	0	4.27991e-05	4.27991e-05	0	4.27991e-05	0.00124117	0.000213995	0.00145517	0.00047079	0.00136957	0.000984378	0.00680939		4.27991e-05	0.000641986
d__Bacteria; k__norank_d__Bacteria; p__Firmicutes; c__Bacilli; o__Lactobacillales; f__Lactobacillaceae; g__Lactobacillus; s__Lactobacillus_reuteri; OTU556	0	0	4.27991e-05	0	0.00175476	8.55981e-05	0.0106998	0.00218275	0.000299593	0.00149797	0	0.0101006	4.27991e-05	4.27991e-05	0.00222555	0.00132677	0	0.000427991	0.127864		0.000299593	8.55981e-05
d__Bacteria; k__norank_d__Bacteria; p__Firmicutes; c__Clostridia; o__Oscillospirales; f__Ruminococcaceae; g__Ruminococcus; s__unclassified_g__Ruminococcus; OTU32	0.0127541	0.00338113	0	0	0	0.000770383	0	0	0	0	0	4.27991e-05	0	0	0	0	0	0.0136529	0.350275		0	0
d__Bacteria; k__norank_d__Bacteria; p__Bacteroidota; c__Bacteroidia; o__Bacteroidales; f__Bacteroidaceae; g__Bacteroides; s__unclassified_g__Bacteroides; OTU319	0.00162636	0.000556388	0.000855981	0.000128397	0.00487909	0.00612027	0	0	0.000128397	0	0	0	0.000770383	0.00333833	0.00834582	0.000855981	0.00132677	0.000641986	0.0034336		0	0.000513589
d__Bacteria; k__norank_d__Bacteria; p__Firmicutes; c__Bacilli; o__Lactobacillales; f__Lactobacillaceae; g__Lactobacillus; s__unclassified_g__Lactobacillus; OTU766	0	0	0.000171196	0	0.0044083	0	0.00954419	0.00261074	0.000171196	0.00119837	0	0.00620586	8.55981e-05	0	0.00329553	0.000299593	0.000128397	0.00111278	0.147386		0.000556388	0.000171196
d__Bacteria; k__norank_d__Bacteria; p__Bacteroidota; c__Bacteroidia; o__Bacteroidales; f__Muribaculaceae; g__norank_f__Muribaculaceae; s__uncultured_bacterium_g__norank_f__Muribaculaceae; OTU231	0.000770383	0.00539268	0	0.00522149	0	0.00500749	0	0	0	0	0.000171196	0	0.00312433	0	0	0	0	0.00239675	0.102565		0	0.00757543
d__Bacteria; k__norank_d__Bacteria; p__Bacteroidota; c__Bacteroidia; o__Bacteroidales; f__Muribaculaceae; g__norank_f__Muribaculaceae; s__uncultured_bacterium_g__norank_f__Muribaculaceae; OTU596	0	0	0	0	0	0	0.00106998	0.018104	0	0.00620586	0	0.00402311	0	0	0	0	0	0	0.00854298		0	0
d__Bacteria; k__norank_d__Bacteria; p__Firmicutes; c__Bacilli; o__Lactobacillales; f__Lactobacillaceae; g__Lactobacillus; s__unclassified_g__Lactobacillus; OTU655	0.000171196	4.27991e-05	0.00175476	0	0.00316713	0.000684785	0.00295314	0.00201156	0.00316713	0.00196876	0	0.00753263	0.000171196	0	0.00222555	0.000128397	0.000213995	0.00089878	0.183384		0.00162636	0.000599187
d__Bacteria; k__norank_d__Bacteria; p__Bacteroidota; c__Bacteroidia; o__Bacteroidales; f__Muribaculaceae; g__norank_f__Muribaculaceae; s__uncultured_bacterium_g__norank_f__Muribaculaceae; OTU619	0	0	0.0047079	0	0.000941579	0	8.55981e-05	0.00089878	0.00269634	8.55981e-05	4.27991e-05	0.000256794	0	0.00427991	0.0104002	0.00269634	0.00218275	0	0.361715		0	0
d__Bacteria; k__norank_d__Bacteria; p__Bacteroidota; c__Bacteroidia; o__Bacteroidales; f__Muribaculaceae; g__norank_f__Muribaculaceae; s__uncultured_bacterium_g__norank_f__Muribaculaceae; OTU636	0	0	0.000427991	0	0.00402311	0	0	0	0.00603467	0	4.27991e-05	0.000342392	0	0.00410871	0.0102718	0.00089878	0.00136957	0	0.353022		0.000641986	0
d__Bacteria; k__norank_d__Bacteria; p__Bacteroidota; c__Bacteroidia; o__Bacteroidales; f__Muribaculaceae; g__norank_f__Muribaculaceae; s__uncultured_bacterium_g__norank_f__Muribaculaceae; OTU568	0	0	0	0	0	0	0.000385192	0.0197304	0	0.00697625	0	0.000128397	0	0	0	0	0	0	0.00854298		0	0
d__Bacteria; k__norank_d__Bacteria; p__Firmicutes; c__Clostridia; o__Lachnospirales; f__Lachnospiraceae; g__norank_f__Lachnospiraceae; s__Clostridium_sp._Culture-27; OTU734	4.27991e-05	0.000684785	0.000213995	0.000770383	0.00047079	0.000984378	8.55981e-05	0	0	0	0	0	0	0.00102718	0.00286754	0.00389471	0.0150653	0.000342392	0.0083001		4.27991e-05	0.00047079
d__Bacteria; k__norank_d__Bacteria; p__Bacteroidota; c__Bacteroidia; o__Bacteroidales; f__Rikenellaceae; g__Alistipes; s__uncultured_bacterium_g__Alistipes; OTU645	0.000342392	0.00213995	0	8.55981e-05	0.0112562	0.000556388	0	4.27991e-05	4.27991e-05	4.27991e-05	0	4.27991e-05	0	8.55981e-05	0.00860261	0.000385192	0.00299593	0	0.116581		0	0
d__Bacteria; k__norank_d__Bacteria; p__Bacteroidota; c__Bacteroidia; o__Bacteroidales; f__Muribaculaceae; g__norank_f__Muribaculaceae; s__uncultured_bacterium_g__norank_f__Muribaculaceae; OTU521	0.00205435	0.00496469	0.00175476	0.000813182	0	0.00124117	4.27991e-05	0.000256794	0.000299593	8.55981e-05	0	8.55981e-05	0.00526428	0.00209715	4.27991e-05	0.000128397	0.000641986	0.00406591	0.079212		0	0.00261074
d__Bacteria; k__norank_d__Bacteria; p__Bacteroidota; c__Bacteroidia; o__Bacteroidales; f__Muribaculaceae; g__norank_f__Muribaculaceae; s__uncultured_bacterium_g__norank_f__Muribaculaceae; OTU488	0.000342392	0.00145517	0.00158357	8.55981e-05	4.27991e-05	0.00201156	0	0.00047079	0.000256794	4.27991e-05	0	0	0.00787503	0.00171196	8.55981e-05	0.000171196	0.00141237	0.00483629	0.0358256		0	0.00406591
d__Bacteria; k__norank_d__Bacteria; p__Bacteroidota; c__Bacteroidia; o__Bacteroidales; f__Rikenellaceae; g__Alistipes; s__uncultured_bacterium_g__Alistipes; OTU648	0.000813182	0.00149797	0.000256794	0.000128397	0.000641986	0.00106998	0	0	0.000171196	0	0	0	0.00231115	0.00243955	0.00102718	0.00128397	0.00235395	0.00338113	0.000987219		0	0.0090306
d__Bacteria; k__norank_d__Bacteria; p__Proteobacteria; c__Gammaproteobacteria; o__Burkholderiales; f__Burkholderiaceae; g__Burkholderia-Caballeronia-Paraburkholderia; s__unclassified_g__Burkholderia-Caballeronia-Paraburkholderia; OTU724	0	0	0	8.55981e-05	4.27991e-05	0	4.27991e-05	0	0	0	0.0213995	0	0	0	0	0	4.27991e-05	4.27991e-05	0.973006		0.0045795	4.27991e-05
d__Bacteria; k__norank_d__Bacteria; p__Firmicutes; c__Clostridia; o__Lachnospirales; f__Lachnospiraceae; g__norank_f__Lachnospiraceae; s__uncultured_bacterium_g__norank_f__Lachnospiraceae; OTU252	0.000641986	0.00102718	0.000342392	0.000770383	0.00295314	0.000342392	4.27991e-05	0	0	0	8.55981e-05	0	0.000128397	0.00654826	0.000256794	0.00106998	0.00804622	0.00145517	0.00289688		0	0.00248235
d__Bacteria; k__norank_d__Bacteria; p__Firmicutes; c__Bacilli; o__Lactobacillales; f__Lactobacillaceae; g__Lactobacillus; s__uncultured_bacterium_g__Lactobacillus; OTU768	0	0	4.27991e-05	0	0.000599187	4.27991e-05	0.00659105	0.00149797	0.000727584	0.00124117	0.000128397	0.0116413	4.27991e-05	0	0.00132677	0.00141237	4.27991e-05	8.55981e-05	0.0112336		0.000299593	0.000213995
d__Bacteria; k__norank_d__Bacteria; p__Firmicutes; c__Clostridia; o__Lachnospirales; f__Lachnospiraceae; g__unclassified_f__Lachnospiraceae; s__unclassified_f__Lachnospiraceae; OTU52	0.0167344	0.00329553	0.00522149	0	0	0	0	0.000385192	0	0	0	0	0	0	4.27991e-05	0	0	0	0.205375		0	0
d__Bacteria; k__norank_d__Bacteria; p__Firmicutes; c__Clostridia; o__Lachnospirales; f__Lachnospiraceae; g__Lachnospiraceae_NK4A136_group; s__Lachnospiraceae_bacterium_COE1; OTU457	0.000513589	0.000256794	0.000256794	0.000684785	0	0.000128397	0	0.000385192	0	8.55981e-05	0	0	4.27991e-05	0.000213995	0.00179756	4.27991e-05	0.0206291	0	0.155356		4.27991e-05	0.000171196
d__Bacteria; k__norank_d__Bacteria; p__Firmicutes; c__Clostridia; o__Peptococcales; f__Peptococcaceae; g__norank_f__Peptococcaceae; s__uncultured_bacterium_g__norank_f__Peptococcaceae; OTU196	0.00291034	0.00188316	0.000385192	0.000256794	0.00188316	0.00213995	8.55981e-05	0.000513589	8.55981e-05	0	0	0	0.000727584	0.000941579	0.00145517	0.00235395	0.00552108	0.00136957	0.00594442		0	0.00222555
d__Bacteria; k__norank_d__Bacteria; p__Firmicutes; c__Clostridia; o__Lachnospirales; f__Lachnospiraceae; g__Lachnospiraceae_NK4A136_group; s__unclassified_g__Lachnospiraceae_NK4A136_group; OTU38	0.0046651	0.0135245	0	0.00543548	0	0.000770383	0	0	0	0	0	0	0	0	0.000299593	0	0	0	0.0216911		0	0
d__Bacteria; k__norank_d__Bacteria; p__Firmicutes; c__Bacilli; o__Lactobacillales; f__Lactobacillaceae; g__Lactobacillus; s__uncultured_bacterium_g__Lactobacillus; OTU543	0	0	0.000213995	0	0.00136957	0	0.0169912	0.00162636	8.55981e-05	0.00184036	0	0.000984378	0	0	0.00158357	0	0	0	0.0511735		0	0
d__Bacteria; k__norank_d__Bacteria; p__Firmicutes; c__Bacilli; o__Lactobacillales; f__Lactobacillaceae; g__Lactobacillus; s__uncultured_bacterium_g__Lactobacillus; OTU540	0	0	0.000256794	0	0.00158357	0	0.0183608	0.000941579	0.000171196	0.00106998	0	0.000599187	0	0	0.00154077	0	4.27991e-05	0	0.161679		0	0
d__Bacteria; k__norank_d__Bacteria; p__Firmicutes; c__Clostridia; o__Lachnospirales; f__Lachnospiraceae; g__norank_f__Lachnospiraceae; s__mouse_gut_metagenome_g__norank; OTU479	4.27991e-05	4.27991e-05	0.000342392	0.000556388	0.00423711	0	8.55981e-05	8.55981e-05	0.000213995	0.0142093	0	0.000171196	0.00166916	0.000213995	8.55981e-05	8.55981e-05	4.27991e-05	0.000941579	0.905201		8.55981e-05	0.00119837
d__Bacteria; k__norank_d__Bacteria; p__Bacteroidota; c__Bacteroidia; o__Bacteroidales; f__Muribaculaceae; g__norank_f__Muribaculaceae; s__uncultured_bacterium_g__norank_f__Muribaculaceae; OTU753	0.00252514	0.000256794	0.00175476	0	0.00149797	4.27991e-05	0	0	0.00089878	0	0	0.00102718	0.000599187	0.000556388	0.00821742	0.00355232	0.00145517	0.00089878	0.0754887		0	0.000770383
d__Bacteria; k__norank_d__Bacteria; p__Bacteroidota; c__Bacteroidia; o__Bacteroidales; f__Muribaculaceae; g__norank_f__Muribaculaceae; s__uncultured_bacterium_g__norank_f__Muribaculaceae; OTU64	0.00166916	0.00629146	0.00179756	0.00124117	0.000128397	0.00136957	0	8.55981e-05	0.000599187	0.000213995	0	0.000213995	0.00235395	0.00184036	8.55981e-05	8.55981e-05	0.000513589	0.00299593	0.0562772		0	0.00179756
d__Bacteria; k__norank_d__Bacteria; p__Firmicutes; c__Bacilli; o__Erysipelotrichales; f__Erysipelotrichaceae; g__norank_f__Erysipelotrichaceae; s__unclassified_g__norank_f__Erysipelotrichaceae; OTU496	0.00286754	0	0	0.000556388	0.000213995	0.000299593	4.27991e-05	0	0.000599187	0	0	0	0.00128397	4.27991e-05	0.00308153	0	0.00269634	0.00826022	0.094169		0	0.00333833
d__Bacteria; k__norank_d__Bacteria; p__Bacteroidota; c__Bacteroidia; o__Bacteroidales; f__Muribaculaceae; g__norank_f__Muribaculaceae; s__uncultured_bacterium_g__norank_f__Muribaculaceae; OTU239	0.000256794	0.00162636	0.00184036	8.55981e-05	0	0.00115557	0	0.000342392	0.000256794	4.27991e-05	0	0	0.00620586	0.00166916	0.000128397	0	0.000684785	0.00505029	0.10677		0	0.00342392
d__Bacteria; k__norank_d__Bacteria; p__Bacteroidota; c__Bacteroidia; o__Bacteroidales; f__Muribaculaceae; g__norank_f__Muribaculaceae; s__uncultured_bacterium_g__norank_f__Muribaculaceae; OTU647	0	0	0.0199872	0	0	0	0	0	0.000513589	0.000171196	0	0.00111278	0	0	0	0	0.000599187	0	0.490738		0	0
d__Bacteria; k__norank_d__Bacteria; p__Bacteroidota; c__Bacteroidia; o__Bacteroidales; f__Muribaculaceae; g__norank_f__Muribaculaceae; s__uncultured_Muribaculaceae_bacterium; OTU601	0	0	0.000984378	0.000128397	0.00141237	0	0.000213995	0.000770383	0.00111278	4.27991e-05	0	0.000299593	0	0.00402311	0.00624866	0.00235395	0.0043227	0	0.275893		0.000256794	0
d__Bacteria; k__norank_d__Bacteria; p__Firmicutes; c__Clostridia; o__Lachnospirales; f__Lachnospiraceae; g__unclassified_f__Lachnospiraceae; s__unclassified_f__Lachnospiraceae; OTU296	0.000513589	0.000941579	0	0.000385192	0.00166916	0.00329553	0.000299593	0	0	0	0	0	0	0.000941579	0.0116413	0.000427991	0.00192596	0	0.0424829		0	0
d__Bacteria; k__norank_d__Bacteria; p__Firmicutes; c__Clostridia; o__Oscillospirales; f__Oscillospiraceae; g__Colidextribacter; s__uncultured_bacterium_g__Colidextribacter; OTU462	0.0047079	0.00239675	0.000256794	0.00158357	0.000556388	0.0045367	0	4.27991e-05	0.000171196	0	0	0	0.00132677	0.000385192	0.000684785	0.00111278	0.000299593	0.00166916	0.00239824		0	0.00196876
d__Bacteria; k__norank_d__Bacteria; p__Firmicutes; c__Clostridia; o__Lachnospirales; f__Lachnospiraceae; g__unclassified_f__Lachnospiraceae; s__unclassified_f__Lachnospiraceae; OTU381	0.00047079	8.55981e-05	4.27991e-05	0.00136957	0.00115557	4.27991e-05	0.000128397	0	4.27991e-05	0.000299593	0	8.55981e-05	0.000813182	0	0.00355232	0.00641986	0.00569227	0.000299593	0.0877728		4.27991e-05	0.00106998
d__Bacteria; k__norank_d__Bacteria; p__Firmicutes; c__Clostridia; o__Lachnospirales; f__Lachnospiraceae; g__unclassified_f__Lachnospiraceae; s__unclassified_f__Lachnospiraceae; OTU356	0.000599187	0.00047079	0	0.000171196	4.27991e-05	0	0	0	0	0	0	0	0	0.000984378	0	0.0185748	0	0	0.108227		0	0
d__Bacteria; k__norank_d__Bacteria; p__Firmicutes; c__Bacilli; o__Erysipelotrichales; f__Erysipelotrichaceae; g__Dubosiella; s__uncultured_bacterium_g__Dubosiella; OTU499	0	0	0	0	0	0	0.00552108	0.00089878	0	0.00175476	0	0.0047507	0.00573507	0	0	0	0	0.000342392	0.0680073		0	0.00175476
d__Bacteria; k__norank_d__Bacteria; p__Firmicutes; c__Clostridia; o__Oscillospirales; f__Butyricicoccaceae; g__Butyricicoccus; s__uncultured_bacterium_g__Butyricicoccus; OTU4	0.00171196	0.000813182	0.000556388	0.00047079	0.00286754	0.000427991	0.00047079	0.000256794	0	4.27991e-05	0	0	0.000128397	0.00102718	0.00089878	0.00363792	0.00701905	8.55981e-05	0.0164981		0	0.000171196
d__Bacteria; k__norank_d__Bacteria; p__Firmicutes; c__Clostridia; o__Oscillospirales; f__Ruminococcaceae; g__norank_f__Ruminococcaceae; s__Acutalibacter_muris; OTU173	0.000427991	0.000641986	0.000427991	0.000128397	0.00582067	0.000813182	0.000171196	0.000171196	0.000171196	4.27991e-05	8.55981e-05	0	0.000128397	0.000641986	0.0044939	0.00338113	0.00184036	0.00047079	0.0170716		0	0.000171196
d__Bacteria; k__norank_d__Bacteria; p__Firmicutes; c__Negativicutes; o__Veillonellales-Selenomonadales; f__Veillonellaceae; g__Veillonella; s__unclassified_g__Veillonella; OTU806	0	0	0	0	0.000128397	0	0	0.000599187	0.00213995	8.55981e-05	0	0	0	0.000556388	0	0.000256794	0	0	0.400631		0.0160924	0
d__Bacteria; k__norank_d__Bacteria; p__Firmicutes; c__Clostridia; o__Oscillospirales; f__Oscillospiraceae; g__Oscillibacter; s__uncultured_bacterium_g__Oscillibacter; OTU289	0.00243955	0.00346672	0.000984378	0.000256794	4.27991e-05	0.000513589	4.27991e-05	0	0	8.55981e-05	0	0	0.00175476	0.00089878	0.000641986	0.00128397	0.0045795	0.000599187	0.00418644		0	0.00218275
d__Bacteria; k__norank_d__Bacteria; p__Bacteroidota; c__Bacteroidia; o__Bacteroidales; f__Muribaculaceae; g__norank_f__Muribaculaceae; s__uncultured_bacterium_g__norank_f__Muribaculaceae; OTU80	0.00419431	0.00950139	0.00106998	0	8.55981e-05	0.00175476	8.55981e-05	0.000171196	0.000213995	4.27991e-05	0	0.000813182	0.000941579	4.27991e-05	0	4.27991e-05	0.000171196	0.000299593	0.219343		0	0.000299593
d__Bacteria; k__norank_d__Bacteria; p__Firmicutes; c__Clostridia; o__Oscillospirales; f__Oscillospiraceae; g__unclassified_f__Oscillospiraceae; s__unclassified_f__Oscillospiraceae; OTU56	0.00308153	0.00106998	0.000599187	0.00132677	0.000770383	0.00620586	4.27991e-05	0.000128397	0.000256794	0	0	4.27991e-05	0.000684785	0.000299593	0.000855981	0.00179756	0.000941579	0.000599187	0.00218598		0	0.000599187
d__Bacteria; k__norank_d__Bacteria; p__Bacteroidota; c__Bacteroidia; o__Bacteroidales; f__Rikenellaceae; g__Alistipes; s__uncultured_bacterium_g__Alistipes; OTU58	0.00184036	0.00248235	0.00299593	0	0	0.000684785	0	0	0	0	8.55981e-05	0	0.00136957	0.000128397	4.27991e-05	0.00184036	0.00106998	0.00376632	0.022838		0	0.00243955
d__Bacteria; k__norank_d__Bacteria; p__Bacteroidota; c__Bacteroidia; o__Bacteroidales; f__Bacteroidaceae; g__Bacteroides; s__unclassified_g__Bacteroides; OTU614	0	0	0.0141665	0	0.000128397	0	0	0	0.00089878	4.27991e-05	8.55981e-05	0	0	0.00115557	0.000727584	0.000855981	0.000513589	0	0.483104		0	0
d__Bacteria; k__norank_d__Bacteria; p__Proteobacteria; c__Gammaproteobacteria; o__Enterobacterales; f__Morganellaceae; g__Morganella; s__Morganella_morganii; OTU715	0	0	0	0	0	0	4.27991e-05	0	0	0	0.0184036	0	0	0	0	0	0	0	0.120314		0	0
d__Bacteria; k__norank_d__Bacteria; p__Firmicutes; c__Bacilli; o__Staphylococcales; f__Staphylococcaceae; g__Staphylococcus; s__Staphylococcus_warneri; OTU604	0	0	0	0	4.27991e-05	0	0.000684785	0.00402311	0	0.00406591	0.00115557	0.00697625	0	0.000171196	0.000256794	8.55981e-05	0	4.27991e-05	0.0117123		0.000513589	0
d__Bacteria; k__norank_d__Bacteria; p__Bacteroidota; c__Bacteroidia; o__Bacteroidales; f__Tannerellaceae; g__Parabacteroides; s__uncultured_organism_g__Parabacteroides; OTU651	0.000342392	4.27991e-05	0.00757543	0	0.000513589	0.00047079	0	0	0.000941579	0	0.000342392	4.27991e-05	0.000427991	0.000984378	0.000171196	0.00209715	0.000770383	0.00171196	0.068911		0	0.00119837
d__Bacteria; k__norank_d__Bacteria; p__Bacteroidota; c__Bacteroidia; o__Bacteroidales; f__Muribaculaceae; g__norank_f__Muribaculaceae; s__uncultured_bacterium_g__norank_f__Muribaculaceae; OTU221	0.000513589	0.000727584	0.00209715	0.000213995	0	0.00500749	0	0.000171196	0.000513589	0	0	8.55981e-05	0.000641986	0.000513589	0	4.27991e-05	0.000641986	0.00239675	0.10279		0	0.00402311
d__Bacteria; k__norank_d__Bacteria; p__Firmicutes; c__Clostridia; o__Lachnospirales; f__Lachnospiraceae; g__unclassified_f__Lachnospiraceae; s__unclassified_f__Lachnospiraceae; OTU395	0.000299593	0.000299593	0.000299593	0.000941579	0.000299593	4.27991e-05	0.000171196	0.000556388	4.27991e-05	0.00303873	0	0.000299593	0.000385192	0.000128397	0.00188316	0.00368072	0.00265354	0.00047079	0.197033		4.27991e-05	0.00192596
d__Bacteria; k__norank_d__Bacteria; p__Firmicutes; c__Bacilli; o__Staphylococcales; f__Staphylococcaceae; g__Staphylococcus; s__Staphylococcus_lentus_g__Staphylococcus; OTU814	0	0	0	0	0.000213995	0	8.55981e-05	0.000213995	0	4.27991e-05	0.00727584	0.00522149	0	0.000385192	0.00119837	0.00115557	0	8.55981e-05	0.0899795		0.00145517	0
d__Bacteria; k__norank_d__Bacteria; p__Bacteroidota; c__Bacteroidia; o__Bacteroidales; f__Bacteroidaceae; g__Bacteroides; s__Bacteroides_vulgatus; OTU516	0	4.27991e-05	0	0	0	4.27991e-05	0	0	0	0	0	0	0.00689065	0	0	0	0	0.00573507	0.290205		0	0.0045367
d__Bacteria; k__norank_d__Bacteria; p__Bacteroidota; c__Bacteroidia; o__Bacteroidales; f__Prevotellaceae; g__unclassified_f__Prevotellaceae; s__unclassified_f__Prevotellaceae; OTU775	0	0	0.00320993	0	0.000342392	0	0	0.000641986	0.00363792	0.000128397	0	0.00145517	0	0.00667665	4.27991e-05	0.000427991	0.000556388	0	0.488148		0	0
d__Bacteria; k__norank_d__Bacteria; p__Firmicutes; c__Clostridia; o__Lachnospirales; f__Lachnospiraceae; g__unclassified_f__Lachnospiraceae; s__unclassified_f__Lachnospiraceae; OTU401	0.000213995	0.000256794	0.000171196	0	0	0	0	0	0	0	0	0	0	0.0043655	0	0	0.0111278	0.000941579	0.112577		0	0
d__Bacteria; k__norank_d__Bacteria; p__Firmicutes; c__Clostridia; o__Oscillospirales; f__Oscillospiraceae; g__norank_f__Oscillospiraceae; s__uncultured_bacterium_g__norank_f__Oscillospiraceae; OTU313	0.000727584	0.00282474	0.000513589	0.000727584	0.00154077	0.000213995	0.000128397	0.000256794	8.55981e-05	8.55981e-05	0	0	0	0.000385192	0.00119837	0.00513589	0.00291034	4.27991e-05	0.0436962		0	0
d__Bacteria; k__norank_d__Bacteria; p__Firmicutes; c__Clostridia; o__Lachnospirales; f__Lachnospiraceae; g__Roseburia; s__uncultured_Clostridiales_bacterium_g__Roseburia; OTU281	4.27991e-05	0	0	0	0	0	0	0	0	0	0	0	0	0.00402311	4.27991e-05	4.27991e-05	0.0124973	0	0.0280578		0	0
d__Bacteria; k__norank_d__Bacteria; p__Bacteroidota; c__Bacteroidia; o__Bacteroidales; f__Muribaculaceae; g__norank_f__Muribaculaceae; s__uncultured_bacterium_g__norank_f__Muribaculaceae; OTU595	0	0	0	0	0	0	4.27991e-05	0.0159212	0	4.27991e-05	0	0.000256794	0	0	0	0	0	0	0.00846403		0	0
d__Bacteria; k__norank_d__Bacteria; p__Firmicutes; c__Bacilli; o__Erysipelotrichales; f__Erysipelotrichaceae; g__Faecalibaculum; s__Faecalibaculum_rodentium; OTU535	0.00047079	4.27991e-05	0.00402311	0	0	0.000342392	0.00273914	0.000770383	8.55981e-05	0.00278194	4.27991e-05	0.00213995	0.000171196	0	0	0	0	0.000342392	0.0601729		0.00154077	0.000556388
d__Bacteria; k__norank_d__Bacteria; p__Firmicutes; c__Clostridia; o__Lachnospirales; f__Lachnospiraceae; g__norank_f__Lachnospiraceae; s__unclassified_g__norank_f__Lachnospiraceae; OTU413	0.00089878	0.000770383	0.000385192	0.00162636	0.000256794	0.000171196	0.000342392	0.000427991	0	0.000641986	0	4.27991e-05	0.00047079	0.00346672	0.00089878	0.00196876	0.00188316	0.000128397	0.0468685		0	0.00149797
d__Bacteria; k__norank_d__Bacteria; p__Firmicutes; c__Clostridia; o__Lachnospirales; f__Lachnospiraceae; g__Eubacterium_xylanophilum_group; s__uncultured_bacterium_g__Eubacterium_xylanophilum_group; OTU188	0	0.00089878	0.00162636	4.27991e-05	0.000599187	0.00231115	0.000342392	0.00235395	0	8.55981e-05	4.27991e-05	0.00145517	0.000684785	0	0.000342392	0.00329553	0	0.00141237	0.930033		0	0.000256794
d__Bacteria; k__norank_d__Bacteria; p__Firmicutes; c__Clostridia; o__Oscillospirales; f__Ruminococcaceae; g__norank_f__Ruminococcaceae; s__uncultured_bacterium_g__norank_f__Ruminococcaceae; OTU403	0.000299593	0.00047079	0.000256794	0.000513589	4.27991e-05	0.000213995	8.55981e-05	4.27991e-05	0	0	0.000171196	4.27991e-05	0	0.00102718	0.00149797	0.00962979	0.00119837	8.55981e-05	0.0379451		0	8.55981e-05
d__Bacteria; k__norank_d__Bacteria; p__Bacteroidota; c__Bacteroidia; o__Bacteroidales; f__Muribaculaceae; g__norank_f__Muribaculaceae; s__uncultured_bacterium_g__norank_f__Muribaculaceae; OTU73	0.00487909	0.00885941	0	0.000299593	0	0.00124117	0	0	0	0	0	0	0.000171196	0	0	0	0	0.000128397	0.0327696		0	4.27991e-05
d__Bacteria; k__norank_d__Bacteria; p__Firmicutes; c__Clostridia; o__Lachnospirales; f__Lachnospiraceae; g__unclassified_f__Lachnospiraceae; s__unclassified_f__Lachnospiraceae; OTU677	0.000513589	0.000171196	0.000171196	0.00226835	0.000855981	0.000385192	0.000984378	0.00201156	0	0.000770383	0.000128397	0.000513589	0.000855981	4.27991e-05	0.00184036	0.000213995	0.00235395	0.000128397	0.982538		4.27991e-05	0.00136957
d__Bacteria; k__norank_d__Bacteria; p__Firmicutes; c__Clostridia; o__Lachnospirales; f__Lachnospiraceae; g__Lachnoclostridium; s__unclassified_g__Lachnoclostridium; OTU474	0.000299593	8.55981e-05	0.000427991	0.000128397	0	4.27991e-05	0.000128397	0	0.000171196	8.55981e-05	0.00770383	0.000385192	0.000256794	8.55981e-05	0.00149797	0.000171196	0.000684785	0.00158357	0.247209		8.55981e-05	0.00175476
d__Bacteria; k__norank_d__Bacteria; p__Bacteroidota; c__Bacteroidia; o__Bacteroidales; f__Muribaculaceae; g__norank_f__Muribaculaceae; s__uncultured_Bacteroidales_bacterium_g__norank_f__Muribaculaceae; OTU779	0	0	0.00851701	0	0	0	0.00132677	4.27991e-05	0.000813182	8.55981e-05	0	0.00368072	0	0	0	0	0	0	0.0181444		0.00089878	0
d__Bacteria; k__norank_d__Bacteria; p__Firmicutes; c__Clostridia; o__Lachnospirales; f__Lachnospiraceae; g__Lachnospiraceae_NK4A136_group; s__Lachnospiraceae_bacterium_COE1; OTU334	0.000256794	0.000213995	0.000684785	0.000385192	0	0.000427991	0	0	0	4.27991e-05	0	0	0.000171196	4.27991e-05	0.000684785	0	0.0122833	0	0.0406669		0	0.000128397
d__Bacteria; k__norank_d__Bacteria; p__Firmicutes; c__Clostridia; o__Lachnospirales; f__Lachnospiraceae; g__unclassified_f__Lachnospiraceae; s__unclassified_f__Lachnospiraceae; OTU277	0	8.55981e-05	0	0.000213995	0.000171196	0	0	0	0	0	0	0	0	0.0126257	0.000941579	0.000641986	0.000599187	0	0.035563		4.27991e-05	0
d__Bacteria; k__norank_d__Bacteria; p__Firmicutes; c__Clostridia; o__Lachnospirales; f__Lachnospiraceae; g__Lachnospiraceae_NK4A136_group; s__uncultured_bacterium_g__Lachnospiraceae_NK4A136_group; OTU87	4.27991e-05	0.00188316	0	0.00188316	0	0	0	0.00372352	4.27991e-05	0.00256794	0	0	0	0	0.0045795	0	0	0	0.6119		0	0
d__Bacteria; k__norank_d__Bacteria; p__Firmicutes; c__Clostridia; o__Oscillospirales; f__Ruminococcaceae; g__norank_f__Ruminococcaceae; s__unclassified_g__norank_f__Ruminococcaceae; OTU454	0.000727584	0.000813182	0	0.000770383	0.00111278	0.000427991	0.000299593	8.55981e-05	4.27991e-05	4.27991e-05	0	0.000342392	0.00047079	0.00278194	0.000813182	0.00329553	0.00179756	0.000213995	0.016984		0	0.000684785
d__Bacteria; k__norank_d__Bacteria; p__Bacteroidota; c__Bacteroidia; o__Bacteroidales; f__Muribaculaceae; g__norank_f__Muribaculaceae; s__uncultured_bacterium_g__norank_f__Muribaculaceae; OTU205	0.000213995	0.000941579	0.00278194	0.000128397	0	0.00389471	0	0	0.000727584	4.27991e-05	0	8.55981e-05	0.00047079	0.000427991	0	0.000256794	0.000599187	0.00141237	0.133682		0	0.00265354
d__Bacteria; k__norank_d__Bacteria; p__Bacteroidota; c__Bacteroidia; o__Bacteroidales; f__Marinifilaceae; g__Odoribacter; s__unclassified_g__Odoribacter; OTU186	0	0	4.27991e-05	0	0.00047079	0	0	8.55981e-05	4.27991e-05	0	0	0	0	0	0.000256794	0.0132677	0.00047079	0	0.527761		0	0
d__Bacteria; k__norank_d__Bacteria; p__Firmicutes; c__Clostridia; o__Lachnospirales; f__Lachnospiraceae; g__Blautia; s__unclassified_g__Blautia; OTU735	8.55981e-05	0	0	4.27991e-05	0	0	0.000427991	0	4.27991e-05	0.000684785	0.0089878	0.000641986	8.55981e-05	0	0	0	0	0.00252514	0.0916203		0.000128397	0.00089878
d__Bacteria; k__norank_d__Bacteria; p__Bacteroidota; c__Bacteroidia; o__Bacteroidales; f__Muribaculaceae; g__norank_f__Muribaculaceae; s__uncultured_bacterium_g__norank_f__Muribaculaceae; OTU585	0	0	0	0	0	0	0	0.0102718	0	0.00325273	0	0.000984378	0	0	0	0	0	0	0.0345016		0	0
d__Bacteria; k__norank_d__Bacteria; p__Firmicutes; c__Clostridia; o__Oscillospirales; f__Oscillospiraceae; g__norank_f__Oscillospiraceae; s__uncultured_bacterium_g__norank_f__Oscillospiraceae; OTU346	0.000770383	0.00248235	0.00115557	0.000213995	0.00188316	0	0	8.55981e-05	8.55981e-05	0	0	4.27991e-05	0	0.000727584	0.00106998	0.0046651	0.00115557	8.55981e-05	0.0459156		0	0
d__Bacteria; k__norank_d__Bacteria; p__Firmicutes; c__Clostridia; o__Lachnospirales; f__Lachnospiraceae; g__unclassified_f__Lachnospiraceae; s__unclassified_f__Lachnospiraceae; OTU223	0.0092446	0.000727584	8.55981e-05	0.000641986	0.000385192	0.00273914	0	0	8.55981e-05	0	0	0	4.27991e-05	0	0.000256794	8.55981e-05	0	0	0.00288459		0	8.55981e-05
d__Bacteria; k__norank_d__Bacteria; p__Firmicutes; c__Clostridia; o__Clostridiales; f__Clostridiaceae; g__Candidatus_Arthromitus; s__Candidatus_Arthromitus_sp._SFB-mouse-Japan; OTU823	0	8.55981e-05	0	0	0.000128397	0	0.00162636	0.000342392	0.000128397	0	0	4.27991e-05	0	0.00282474	0.00192596	0.00047079	0.000299593	0	0.178573		0.00637706	4.27991e-05
d__Bacteria; k__norank_d__Bacteria; p__Firmicutes; c__Clostridia; o__Oscillospirales; f__Ruminococcaceae; g__Anaerotruncus; s__uncultured_bacterium_g__Anaerotruncus; OTU280	0.000171196	0.000684785	0	0.00111278	8.55981e-05	0.000513589	0	4.27991e-05	0	0	8.55981e-05	0	4.27991e-05	0.00676225	0.000213995	0.00179756	0.00222555	8.55981e-05	0.015124		0	0.000427991
d__Bacteria; k__norank_d__Bacteria; p__Firmicutes; c__Clostridia; o__Lachnospirales; f__Lachnospiraceae; g__Lachnoclostridium; s__unclassified_g__Lachnoclostridium; OTU491	4.27991e-05	0.000128397	0.000171196	8.55981e-05	0.000813182	4.27991e-05	0	0	0	0	0	4.27991e-05	0.000213995	0.000984378	0.00102718	0.000513589	0.000813182	0.0045367	0.000865833		0	0.00479349
d__Bacteria; k__norank_d__Bacteria; p__Bacteroidota; c__Bacteroidia; o__Bacteroidales; f__Muribaculaceae; g__norank_f__Muribaculaceae; s__uncultured_bacterium_g__norank_f__Muribaculaceae; OTU159	0.000855981	0.00136957	0	0.00843141	0	0.00243955	0	0	0	0	0	0	0.000128397	0	0	0	0	0.000684785	0.0327696		0	0.000299593
d__Bacteria; k__norank_d__Bacteria; p__Bacteroidota; c__Bacteroidia; o__Bacteroidales; f__Muribaculaceae; g__norank_f__Muribaculaceae; s__uncultured_bacterium_g__norank_f__Muribaculaceae; OTU761	0	0	0.0113418	0	0	0	0.000171196	0	8.55981e-05	0.000171196	0	0.00235395	0	0	0	0	0	0	0.0593709		4.27991e-05	0
d__Bacteria; k__norank_d__Bacteria; p__Firmicutes; c__Bacilli; o__Lactobacillales; f__Lactobacillaceae; g__Lactobacillus; s__unclassified_g__Lactobacillus; OTU185	0	4.27991e-05	4.27991e-05	0	0.011085	0	0	0.000128397	0.00047079	8.55981e-05	0	8.55981e-05	0	0.000128397	0.000684785	0.00089878	8.55981e-05	0.000128397	0.270794		4.27991e-05	8.55981e-05
d__Bacteria; k__norank_d__Bacteria; p__Actinobacteriota; c__Coriobacteriia; o__Coriobacteriales; f__Eggerthellaceae; g__Enterorhabdus; s__uncultured_bacterium_g__Enterorhabdus; OTU754	8.55981e-05	0.000684785	0.000128397	0.00106998	4.27991e-05	0.000813182	0.00119837	0.000513589	0.000385192	0.00154077	8.55981e-05	0.00132677	0.000342392	0.000342392	0.000513589	0.000213995	0.000128397	0.00119837	0.336569		0.00248235	0.00089878
d__Bacteria; k__norank_d__Bacteria; p__Proteobacteria; c__Gammaproteobacteria; o__Burkholderiales; f__Sutterellaceae; g__Parasutterella; s__uncultured_bacterium_g__Parasutterella; OTU101	0	0	0.00226835	0	0	0	8.55981e-05	0.00787503	0	0.00363792	0	0	0	0	0	0	0	0	0.112406		0	0
d__Bacteria; k__norank_d__Bacteria; p__Firmicutes; c__Clostridia; o__Oscillospirales; f__Oscillospiraceae; g__Oscillibacter; s__uncultured_bacterium_g__Oscillibacter; OTU348	0.000213995	0.000641986	0.000128397	8.55981e-05	0.00106998	0.000128397	4.27991e-05	0	4.27991e-05	0	0	0	4.27991e-05	0.000556388	0.00106998	0.00483629	0.00479349	0.000128397	0.00359078		0	8.55981e-05
d__Bacteria; k__norank_d__Bacteria; p__Firmicutes; c__Clostridia; o__Clostridia_UCG-014; f__norank_o__Clostridia_UCG-014; g__norank_f__norank_o__Clostridia_UCG-014; s__uncultured_rumen_bacterium_g__norank_f__norank_o__Clostridia_UCG-014; OTU176	0.00141237	0.000342392	0.00047079	0	0.00252514	0	0.00089878	0	4.27991e-05	4.27991e-05	0	0.000171196	0	0.00329553	0	0.00192596	0.00265354	0	0.684532		0	0
d__Bacteria; k__norank_d__Bacteria; p__Firmicutes; c__Clostridia; o__Lachnospirales; f__Lachnospiraceae; g__Lachnospiraceae_NK4A136_group; s__uncultured_bacterium_g__Lachnospiraceae_NK4A136_group; OTU86	0.000342392	0.0133961	0	4.27991e-05	0	0	0	0	0	0	0	0	0	0	0	0	0	0	0.0345016		0	0
d__Bacteria; k__norank_d__Bacteria; p__Firmicutes; c__Clostridia; o__Lachnospirales; f__Lachnospiraceae; g__norank_f__Lachnospiraceae; s__uncultured_bacterium_g__norank_f__Lachnospiraceae; OTU425	8.55981e-05	0.000684785	4.27991e-05	0.000213995	4.27991e-05	0	0	0	0	0	0	0	0	0.00128397	0.00282474	0.00346672	0.00509309	0	0.021158		0	0
d__Bacteria; k__norank_d__Bacteria; p__Firmicutes; c__Clostridia; o__Lachnospirales; f__Lachnospiraceae; g__GCA-900066575; s__uncultured_bacterium_g__GCA-900066575; OTU100	0.00205435	0.00346672	0.000299593	0.00124117	0.00128397	0.000556388	0	8.55981e-05	0	4.27991e-05	0	0	0.000299593	0.000128397	0.00222555	8.55981e-05	0.000556388	0.000427991	0.00197867		0	0.000984378
d__Bacteria; k__norank_d__Bacteria; p__Firmicutes; c__Clostridia; o__Oscillospirales; f__Ruminococcaceae; g__Ruminococcus; s__unclassified_g__Ruminococcus; OTU9	0.00500749	0.00261074	0.00265354	0.00089878	0	0.00102718	0	0	0	0	0	0	4.27991e-05	0.000299593	0	0.000984378	8.55981e-05	0	0.00770624		0	0
d__Bacteria; k__norank_d__Bacteria; p__Firmicutes; c__Clostridia; o__Lachnospirales; f__Lachnospiraceae; g__Lachnospiraceae_NK4A136_group; s__uncultured_bacterium_g__Lachnospiraceae_NK4A136_group; OTU106	0	0.000171196	0.0132677	0	0	0	0	8.55981e-05	0	0	8.55981e-05	0	0	0	0	0	0	0	0.290205		0	0
d__Bacteria; k__norank_d__Bacteria; p__Firmicutes; c__Clostridia; o__Lachnospirales; f__Lachnospiraceae; g__norank_f__Lachnospiraceae; s__uncultured_bacterium_g__norank_f__Lachnospiraceae; OTU193	0	0	0	0	0.00419431	0.000171196	0	0	0	0	0	0	0	4.27991e-05	0.000855981	0.00111278	0.00710464	0	0.0680073		0	0
d__Bacteria; k__norank_d__Bacteria; p__Firmicutes; c__Clostridia; o__Lachnospirales; f__Lachnospiraceae; g__Blautia; s__unclassified_g__Blautia; OTU163	0.000556388	0.000213995	0	0.00552108	0	0.000128397	4.27991e-05	0.000256794	0	8.55981e-05	0	0	0.000684785	0	0.0043655	4.27991e-05	0.000299593	0.000684785	0.183351		8.55981e-05	0.000427991
d__Bacteria; k__norank_d__Bacteria; p__Bacteroidota; c__Bacteroidia; o__Bacteroidales; f__Muribaculaceae; g__norank_f__Muribaculaceae; s__uncultured_bacterium_g__norank_f__Muribaculaceae; OTU273	0.000256794	0.000385192	0.00089878	0	0.000128397	8.55981e-05	0	0	0	0	0	4.27991e-05	0.000599187	0.00714744	0.000256794	4.27991e-05	0.00291034	0.000385192	0.00538648		0	0.000213995
d__Bacteria; k__norank_d__Bacteria; p__Proteobacteria; c__Gammaproteobacteria; o__Burkholderiales; f__Alcaligenaceae; g__Paenalcaligenes; s__Paenalcaligenes_hominis; OTU805	0	4.27991e-05	0	0	0	0	0	0	0	0	0.00402311	0	0	0	0	0	0	0	0.586071		0.0092874	0
d__Bacteria; k__norank_d__Bacteria; p__Firmicutes; c__Clostridia; o__Monoglobales; f__Monoglobaceae; g__Monoglobus; s__unclassified_g__Monoglobus; OTU449	0	0	0	0	0.000684785	0	0.000128397	0.00047079	0.000171196	0.000128397	0	8.55981e-05	0	0.00291034	0.00192596	4.27991e-05	0.00667665	0	0.155583		0	0
d__Bacteria; k__norank_d__Bacteria; p__Cyanobacteria; c__Cyanobacteriia; o__Chloroplast; f__norank_o__Chloroplast; g__norank_f__norank_o__Chloroplast; s__Phaseolus_vulgaris_g__norank_f__norank; OTU820	0	0	0	0	0	0	0.000427991	4.27991e-05	0	0	0.0106142	0	0	0	0	0	0	0	0.0345016		0.00154077	0
d__Bacteria; k__norank_d__Bacteria; p__Firmicutes; c__Clostridia; o__Lachnospirales; f__Lachnospiraceae; g__unclassified_f__Lachnospiraceae; s__unclassified_f__Lachnospiraceae; OTU75	4.27991e-05	0.00286754	0.000171196	0.000299593	0.00102718	4.27991e-05	8.55981e-05	0.000342392	0	0.00487909	8.55981e-05	0.000385192	0.000556388	0.00047079	4.27991e-05	0.000427991	0.000641986	0	0.944242		4.27991e-05	0.000171196
d__Bacteria; k__norank_d__Bacteria; p__Bacteroidota; c__Bacteroidia; o__Bacteroidales; f__Muribaculaceae; g__norank_f__Muribaculaceae; s__unclassified_g__norank_f__Muribaculaceae; OTU483	0	0	0	0	0	0	0.000256794	0.00192596	0	0.000556388	0	0.000727584	0.00342392	0	0	0	0	0.00303873	0.108227		0	0.00265354
d__Bacteria; k__norank_d__Bacteria; p__Firmicutes; c__Clostridia; o__Lachnospirales; f__Lachnospiraceae; g__Lachnospiraceae_NK4A136_group; s__uncultured_bacterium_g__Lachnospiraceae_NK4A136_group; OTU400	0	0	0.00141237	0	0	0	0	0.00530708	0	8.55981e-05	4.27991e-05	0	0.000342392	4.27991e-05	0.000342392	0	0.00483629	0	0.324585		0	0
d__Bacteria; k__norank_d__Bacteria; p__Bacteroidota; c__Bacteroidia; o__Bacteroidales; f__Muribaculaceae; g__norank_f__Muribaculaceae; s__uncultured_bacterium_g__norank_f__Muribaculaceae; OTU602	0	0	0	0	0	0	0.000299593	0.00671945	0	0.00132677	0	0.000256794	0	0.000385192	0	0	0.00338113	0	0.0783087		0	0
d__Bacteria; k__norank_d__Bacteria; p__Firmicutes; c__Clostridia; o__Lachnospirales; f__Lachnospiraceae; g__A2; s__uncultured_bacterium_g__A2; OTU417	0	0.000813182	0	0.000213995	4.27991e-05	4.27991e-05	0	0	0	0	0	0	0	0	0.000128397	0.00047079	0.010443	4.27991e-05	0.0455779		0	4.27991e-05
d__Bacteria; k__norank_d__Bacteria; p__Actinobacteriota; c__Coriobacteriia; o__Coriobacteriales; f__Eggerthellaceae; g__Enterorhabdus; s__uncultured_bacterium_g__Enterorhabdus; OTU803	0	0	0	0.0046223	0.000213995	0.000128397	0.000427991	0.000171196	0.000171196	0.000427991	0	0.000299593	4.27991e-05	0.00102718	0.000855981	4.27991e-05	0.000299593	8.55981e-05	0.498713		0.00325273	8.55981e-05
d__Bacteria; k__norank_d__Bacteria; p__Desulfobacterota; c__Desulfovibrionia; o__Desulfovibrionales; f__Desulfovibrionaceae; g__Bilophila; s__uncultured_bacterium_g__Bilophila; OTU229	0.00132677	0.00145517	8.55981e-05	0	0.000213995	0.000984378	0.000427991	0	0	0	0.000128397	4.27991e-05	0.00158357	0.000213995	0.000770383	0.00141237	0.000213995	0.000984378	0.0320426		0	0.00226835
d__Bacteria; k__norank_d__Bacteria; p__Actinobacteriota; c__Actinobacteria; o__Corynebacteriales; f__Corynebacteriaceae; g__Corynebacterium; s__Corynebacterium_stationis; OTU759	0	0.000128397	0	0	0	0	8.55981e-05	0.000128397	0	4.27991e-05	0.00582067	0.00303873	0	0	0	0	0	4.27991e-05	0.0210024		0.00273914	0
d__Bacteria; k__norank_d__Bacteria; p__Firmicutes; c__Clostridia; o__Lachnospirales; f__Lachnospiraceae; g__A2; s__uncultured_bacterium_g__A2; OTU465	0.000342392	0.000342392	0	0.00243955	0.00141237	0	8.55981e-05	0	8.55981e-05	0	0	0	4.27991e-05	4.27991e-05	0.000941579	0.00286754	0.00115557	0.00184036	0.0535213		0	0.000213995
d__Bacteria; k__norank_d__Bacteria; p__Bacteroidota; c__Bacteroidia; o__Bacteroidales; f__Muribaculaceae; g__norank_f__Muribaculaceae; s__uncultured_bacterium_g__norank_f__Muribaculaceae; OTU232	0.00256794	0.00158357	0.000213995	8.55981e-05	4.27991e-05	0.00102718	0	0.000299593	4.27991e-05	0	0	0	0.00269634	0.000299593	4.27991e-05	0	0	0.00115557	0.0684012		0	0.00166916
d__Bacteria; k__norank_d__Bacteria; p__Desulfobacterota; c__Desulfovibrionia; o__Desulfovibrionales; f__Desulfovibrionaceae; g__norank_f__Desulfovibrionaceae; s__uncultured_bacterium_g__norank_f__Desulfovibrionaceae; OTU251	0	0	4.27991e-05	0	0.00179756	0	0.0043655	0.000770383	0.000128397	0.00119837	4.27991e-05	4.27991e-05	0	0.000299593	0.00231115	0.000213995	0.000342392	0	0.1485		0	0
d__Bacteria; k__norank_d__Bacteria; p__Firmicutes; c__Clostridia; o__Clostridia_UCG-014; f__norank_o__Clostridia_UCG-014; g__norank_f__norank_o__Clostridia_UCG-014; s__unclassified_g__norank_f__norank_o__Clostridia_UCG-014; OTU290	0.00273914	0.000128397	0.00256794	0	0.000299593	0.000556388	0.000513589	0.000256794	4.27991e-05	0.00132677	4.27991e-05	0.000128397	8.55981e-05	0.000299593	0.00162636	0.000299593	0.000171196	0.000299593	0.563897		4.27991e-05	8.55981e-05
d__Bacteria; k__norank_d__Bacteria; p__Firmicutes; c__Clostridia; o__Lachnospirales; f__Lachnospiraceae; g__A2; s__uncultured_bacterium_g__A2; OTU440	0	0.000770383	0	0.000684785	0	0	0	0	4.27991e-05	0	0	0	0	4.27991e-05	0.000256794	0.00171196	0.00791783	0	0.158373		0	8.55981e-05
d__Bacteria; k__norank_d__Bacteria; p__Firmicutes; c__Clostridia; o__Lachnospirales; f__Lachnospiraceae; g__unclassified_f__Lachnospiraceae; s__unclassified_f__Lachnospiraceae; OTU197	0	8.55981e-05	8.55981e-05	4.27991e-05	0.00380912	0.000256794	0	0	4.27991e-05	0.000128397	0	0	0.000213995	0	0.00415151	0	0	0.00166916	0.246443		0	0.000984378
d__Bacteria; k__norank_d__Bacteria; p__Bacteroidota; c__Bacteroidia; o__Bacteroidales; f__Muribaculaceae; g__norank_f__Muribaculaceae; s__uncultured_bacterium_g__norank_f__Muribaculaceae; OTU74	0.00312433	0.00286754	0	0.000342392	0	0.00265354	0	0	0	0	0	0	0.000385192	0	0	0	0	0.00136957	0.0488007		0	0.000684785
d__Bacteria; k__norank_d__Bacteria; p__Firmicutes; c__Clostridia; o__Lachnospirales; f__Lachnospiraceae; g__norank_f__Lachnospiraceae; s__uncultured_bacterium_g__norank_f__Lachnospiraceae; OTU94	0.000385192	0.000770383	0	0.008945	4.27991e-05	0	0	0	0	0.000513589	0	0	4.27991e-05	0	0	0	0.000513589	0.000128397	0.237854		0	4.27991e-05
d__Bacteria; k__norank_d__Bacteria; p__Firmicutes; c__Clostridia; o__Lachnospirales; f__Lachnospiraceae; g__Lachnospiraceae_NK4A136_group; s__uncultured_bacterium_g__Lachnospiraceae_NK4A136_group; OTU671	0.000171196	0.000213995	0	0.000556388	0	0	0	0.000128397	0	0.008945	0	0.000171196	0	4.27991e-05	0.000128397	0	0.00089878	0	0.936852		0	8.55981e-05
d__Bacteria; k__norank_d__Bacteria; p__Cyanobacteria; c__Vampirivibrionia; o__Gastranaerophilales; f__norank_o__Gastranaerophilales; g__norank_f__norank_o__Gastranaerophilales; s__unclassified_g__norank_f__norank_o__Gastranaerophilales; OTU204	0	0.00141237	0	0	0	0.00971539	0	0	0	0	0	0	0.000213995	0	0	0	0	0	0.283428		0	0
d__Bacteria; k__norank_d__Bacteria; p__Firmicutes; c__Clostridia; o__Oscillospirales; f__Oscillospiraceae; g__Colidextribacter; s__uncultured_bacterium_g__Colidextribacter; OTU21	0.00269634	0.000684785	0.000427991	0.000427991	0.00102718	0.000427991	4.27991e-05	0.000342392	4.27991e-05	8.55981e-05	0	4.27991e-05	0.00047079	0.000770383	0.00102718	0.000984378	0.00115557	0.000213995	0.00431013		0	0.00047079
d__Bacteria; k__norank_d__Bacteria; p__Bacteroidota; c__Bacteroidia; o__Bacteroidales; f__Tannerellaceae; g__Parabacteroides; s__uncultured_Bacteroidales_bacterium_g__Parabacteroides; OTU646	0	0	0	0	0	0	0	0.000171196	4.27991e-05	0	0	0	0.00128397	0.000171196	0.000342392	0	0.000128397	0.0045795	0.00914017		0	0.0045795
d__Bacteria; k__norank_d__Bacteria; p__Cyanobacteria; c__Vampirivibrionia; o__Gastranaerophilales; f__norank_o__Gastranaerophilales; g__norank_f__norank_o__Gastranaerophilales; s__uncultured_bacterium_g__norank_f__norank_o__Gastranaerophilales; OTU481	0	0.00162636	4.27991e-05	0	0	0.00612027	4.27991e-05	0	0	0	0	8.55981e-05	0.000813182	0	0	0	0	0.00179756	0.685989		4.27991e-05	0.000641986
d__Bacteria; k__norank_d__Bacteria; p__Firmicutes; c__Clostridia; o__Clostridia_UCG-014; f__norank_o__Clostridia_UCG-014; g__norank_f__norank_o__Clostridia_UCG-014; s__uncultured_bacterium_g__norank_f__norank_o__Clostridia_UCG-014; OTU326	0.000941579	0.000513589	0.00201156	8.55981e-05	0.000599187	0.000427991	0.000342392	0.000342392	0.000128397	0.00124117	0	0.000213995	0	0.000599187	0.00089878	0.000984378	0.00175476	0	0.449866		0	0
d__Bacteria; k__norank_d__Bacteria; p__Bacteroidota; c__Bacteroidia; o__Bacteroidales; f__Muribaculaceae; g__norank_f__Muribaculaceae; s__uncultured_bacterium_g__norank_f__Muribaculaceae; OTU589	0	0	0	0	0	0	0	0.0110422	0	0	0	4.27991e-05	0	0	0	0	0	0	0.120314		0	0
d__Bacteria; k__norank_d__Bacteria; p__Bacteroidota; c__Bacteroidia; o__Bacteroidales; f__Muribaculaceae; g__norank_f__Muribaculaceae; s__uncultured_bacterium_g__norank_f__Muribaculaceae; OTU249	0	0	0.00089878	0	0.000171196	0	4.27991e-05	0.00102718	0.00111278	0.000128397	0	0.00136957	0	0.00136957	0.00192596	0.00158357	0.00119837	0	0.128479		0	0
d__Bacteria; k__norank_d__Bacteria; p__Firmicutes; c__Clostridia; o__Clostridia_vadinBB60_group; f__norank_o__Clostridia_vadinBB60_group; g__norank_f__norank_o__Clostridia_vadinBB60_group; s__unclassified_g__norank_f__norank_o__Clostridia_vadinBB60_group; OTU451	0	0	0	4.27991e-05	0.000171196	0	0	0	0	0	0	0	0	0	0.00111278	0.00111278	0.00813182	0	0.121126		0	0
d__Bacteria; k__norank_d__Bacteria; p__Bacteroidota; c__Bacteroidia; o__Bacteroidales; f__Muribaculaceae; g__norank_f__Muribaculaceae; s__uncultured_bacterium_g__norank_f__Muribaculaceae; OTU70	0.00359512	0.00564948	0	0.000256794	0	0.000984378	0	0	0	0	0	0	0	0	0	0	0	4.27991e-05	0.0216911		0	4.27991e-05
d__Bacteria; k__norank_d__Bacteria; p__Firmicutes; c__Clostridia; o__Oscillospirales; f__UCG-010; g__norank_f__UCG-010; s__unclassified_g__norank_f__UCG-010; OTU13	0.00115557	0.000171196	0.000299593	0.000813182	0.000128397	0.000256794	0	0	0.000299593	0	0	0	0.00166916	0.000128397	0.00179756	0.000427991	0.000513589	0.00273914	0.00659192		0	0
d__Bacteria; k__norank_d__Bacteria; p__Bacteroidota; c__Bacteroidia; o__Bacteroidales; f__Muribaculaceae; g__norank_f__Muribaculaceae; s__uncultured_bacterium_g__norank_f__Muribaculaceae; OTU43	0.000556388	0.000342392	0.000599187	0.000171196	4.27991e-05	0.000513589	0	0.000213995	0.000684785	8.55981e-05	0	0.000128397	0.000770383	0.000556388	0.000299593	8.55981e-05	0.000299593	0.00209715	0.15937		0	0.00278194
d__Bacteria; k__norank_d__Bacteria; p__Firmicutes; c__Clostridia; o__Lachnospirales; f__Lachnospiraceae; g__norank_f__Lachnospiraceae; s__unclassified_g__norank_f__Lachnospiraceae; OTU297	8.55981e-05	0	0.00106998	0	0.000684785	0.000599187	0	8.55981e-05	0	0	4.27991e-05	4.27991e-05	0.00158357	8.55981e-05	0.000427991	4.27991e-05	4.27991e-05	0.00316713	0.0890834		4.27991e-05	0.00179756
d__Bacteria; k__norank_d__Bacteria; p__Proteobacteria; c__Gammaproteobacteria; o__Pasteurellales; f__Pasteurellaceae; g__Rodentibacter; s__Pasteurellaceae_bacterium_g__Rodentibacter; OTU807	0	0	0	0	8.55981e-05	0	8.55981e-05	0	0	0	0	4.27991e-05	0	0	0	0	4.27991e-05	0	0.733523		0.00941579	0
d__Bacteria; k__norank_d__Bacteria; p__Firmicutes; c__Clostridia; o__Oscillospirales; f__Oscillospiraceae; g__UCG-005; s__uncultured_Clostridiales_bacterium_g__UCG-005; OTU168	0.000855981	0.00141237	4.27991e-05	0.00136957	0.000770383	4.27991e-05	0	4.27991e-05	0	0	0	0	0	0.00222555	0.000256794	0.00175476	0.000813182	0	0.0231604		0	0
d__Bacteria; k__norank_d__Bacteria; p__Bacteroidota; c__Bacteroidia; o__Bacteroidales; f__Muribaculaceae; g__norank_f__Muribaculaceae; s__unclassified_g__norank_f__Muribaculaceae; OTU609	0	0	0	0	0.000213995	0	8.55981e-05	0.00650546	0.000128397	0.00136957	0	0.000599187	0	0	0.000342392	0	0.000299593	0	0.0566799		0	0
d__Bacteria; k__norank_d__Bacteria; p__Firmicutes; c__Clostridia; o__Oscillospirales; f__Oscillospiraceae; g__norank_f__Oscillospiraceae; s__uncultured_bacterium_g__norank_f__Oscillospiraceae; OTU278	0	0.000128397	4.27991e-05	4.27991e-05	0.000171196	0	0	0	0	0	0	0	4.27991e-05	0.000684785	0.000770383	0.00363792	0.00402311	0	0.0105308		0	0
d__Bacteria; k__norank_d__Bacteria; p__Firmicutes; c__Clostridia; o__Lachnospirales; f__Lachnospiraceae; g__unclassified_f__Lachnospiraceae; s__unclassified_f__Lachnospiraceae; OTU144	0	0	0	0.000599187	0.0044511	0	0	0	0	0	0	0	0	0.000513589	0.00282474	4.27991e-05	0.000941579	0	0.0886867		0	0
d__Bacteria; k__norank_d__Bacteria; p__Bacteroidota; c__Bacteroidia; o__Bacteroidales; f__Bacteroidaceae; g__Bacteroides; s__Bacteroides_caecimuris; OTU649	0.000128397	0.000171196	0.000171196	4.27991e-05	0.000684785	0.00179756	0	0	0.000342392	0	0	8.55981e-05	0.000385192	0.000599187	0.000342392	0.000171196	8.55981e-05	0.00162636	0.0275579		0	0.00269634
d__Bacteria; k__norank_d__Bacteria; p__Bacteroidota; c__Bacteroidia; o__Bacteroidales; f__Muribaculaceae; g__norank_f__Muribaculaceae; s__uncultured_bacterium_g__norank_f__Muribaculaceae; OTU51	0.00243955	0.00252514	0	0.000256794	0	0.00261074	0	0	0	0	0	0	0.000256794	0	0	0	0	0.000941579	0.0442494		0	0.000213995
d__Bacteria; k__norank_d__Bacteria; p__Bacteroidota; c__Bacteroidia; o__Bacteroidales; f__Muribaculaceae; g__norank_f__Muribaculaceae; s__uncultured_bacterium_g__norank_f__Muribaculaceae; OTU265	0.000128397	0.000171196	0.00047079	0	4.27991e-05	4.27991e-05	0	4.27991e-05	4.27991e-05	0	0	4.27991e-05	0.000385192	0.00586347	8.55981e-05	4.27991e-05	0.00162636	0.000128397	0.0177107		0	4.27991e-05
d__Bacteria; k__norank_d__Bacteria; p__Firmicutes; c__Bacilli; o__Erysipelotrichales; f__Erysipelotrichaceae; g__norank_f__Erysipelotrichaceae; s__uncultured_Allobaculum_sp._g__norank; OTU538	0	0	0	0	0	0	0.00291034	0.0046223	0	0.00145517	0	0.000171196	0	0	0	0	0	0	0.00854298		0	0
d__Bacteria; k__norank_d__Bacteria; p__Firmicutes; c__Clostridia; o__Oscillospirales; f__Ruminococcaceae; g__unclassified_f__Ruminococcaceae; s__unclassified_f__Ruminococcaceae; OTU291	0	0	4.27991e-05	0	0.00166916	0	0	0	0	0	0	0	0	0.00124117	0.00346672	0.00231115	0.000342392	0	0.0488007		0	0
d__Bacteria; k__norank_d__Bacteria; p__Bacteroidota; c__Bacteroidia; o__Bacteroidales; f__Muribaculaceae; g__norank_f__Muribaculaceae; s__uncultured_bacterium_g__norank_f__Muribaculaceae; OTU396	4.27991e-05	0.000256794	0.000213995	0	8.55981e-05	4.27991e-05	0	0	0	0	0	0	0.000556388	0.0043655	0.000299593	4.27991e-05	0.00231115	0.000427991	0.00137501		0	0.000256794
d__Bacteria; k__norank_d__Bacteria; p__Firmicutes; c__Clostridia; o__Lachnospirales; f__Lachnospiraceae; g__Lachnospiraceae_UCG-001; s__unclassified_g__Lachnospiraceae_UCG-001; OTU292	8.55981e-05	0.00089878	0	0	0.000385192	0	0	0	0	0	4.27991e-05	0	0.000213995	0.00239675	0.000984378	0.00363792	0	0	0.0954859		0	0.000213995
d__Bacteria; k__norank_d__Bacteria; p__Bacteroidota; c__Bacteroidia; o__Bacteroidales; f__Muribaculaceae; g__norank_f__Muribaculaceae; s__uncultured_bacterium_g__norank_f__Muribaculaceae; OTU574	0	0	0	0	0	0	4.27991e-05	0.00701905	0	0.00166916	0	0	0	0	0	0	0	0	0.0345016		0	0
d__Bacteria; k__norank_d__Bacteria; p__Bacteroidota; c__Bacteroidia; o__Bacteroidales; f__Muribaculaceae; g__norank_f__Muribaculaceae; s__uncultured_Bacteroidales_bacterium_g__norank_f__Muribaculaceae; OTU254	0	0	0.000171196	0	0.000256794	0	0	0	0.000256794	0	0	0	8.55981e-05	0.00607747	4.27991e-05	0.000984378	0.000770383	4.27991e-05	0.0231687		0	4.27991e-05
d__Bacteria; k__norank_d__Bacteria; p__Firmicutes; c__Bacilli; o__Lactobacillales; f__Lactobacillaceae; g__Lactobacillus; s__uncultured_bacterium_g__Lactobacillus; OTU560	0	0	0	0	0	0	0.00774663	4.27991e-05	0	0.000171196	0	0.000213995	0	0	0.000213995	0	0	0	0.0420567		0	0
d__Bacteria; k__norank_d__Bacteria; p__Bacteroidota; c__Bacteroidia; o__Bacteroidales; f__Rikenellaceae; g__Alistipes; s__Alistipes_sp._cv1; OTU626	0	0	0.000427991	0	0.000171196	0	0	0	0.000299593	8.55981e-05	0	0	0	0.000128397	0.000256794	0.000256794	0.00671945	0	0.402389		0	0
d__Bacteria; k__norank_d__Bacteria; p__Firmicutes; c__Clostridia; o__Clostridia_UCG-014; f__norank_o__Clostridia_UCG-014; g__norank_f__norank_o__Clostridia_UCG-014; s__unclassified_g__norank_f__norank_o__Clostridia_UCG-014; OTU263	0.00124117	4.27991e-05	0.00047079	0	0	0	0	4.27991e-05	0	0	0	8.55981e-05	0	0.00569227	0	0	0.000727584	0	0.756987		4.27991e-05	0
d__Bacteria; k__norank_d__Bacteria; p__Firmicutes; c__Clostridia; o__Lachnospirales; f__Lachnospiraceae; g__Eubacterium_xylanophilum_group; s__uncultured_bacterium_g__Eubacterium_xylanophilum_group; OTU385	0.00102718	0	0	0	0.00196876	0	0	0	0.000128397	0	0	0	0	0.000128397	0.000213995	0.000385192	0.00423711	8.55981e-05	0.0995001		0	0.000128397
d__Bacteria; k__norank_d__Bacteria; p__Bacteroidota; c__Bacteroidia; o__Bacteroidales; f__Muribaculaceae; g__norank_f__Muribaculaceae; s__uncultured_bacterium_g__norank_f__Muribaculaceae; OTU565	0	0	0	0	0	0	0	0.00573507	0	0.00205435	0	0.000513589	0	0	0	0	0	0	0.0345016		0	0
d__Bacteria; k__norank_d__Bacteria; p__Firmicutes; c__Clostridia; o__Lachnospirales; f__Lachnospiraceae; g__unclassified_f__Lachnospiraceae; s__unclassified_f__Lachnospiraceae; OTU306	0	0	0.000128397	0	0.000427991	0	0	0	0	0	0	4.27991e-05	0	0.000171196	0.00278194	0	0.0047507	0	0.300908		0	0
d__Bacteria; k__norank_d__Bacteria; p__Firmicutes; c__Clostridia; o__Oscillospirales; f__Ruminococcaceae; g__norank_f__Ruminococcaceae; s__uncultured_bacterium_g__norank_f__Ruminococcaceae; OTU669	0	0	0	0	0	0	0	0	0	0.00817462	0	0	0	0	0	0	0	0	0.367879		0	0
d__Bacteria; k__norank_d__Bacteria; p__Desulfobacterota; c__Desulfovibrionia; o__Desulfovibrionales; f__Desulfovibrionaceae; g__norank_f__Desulfovibrionaceae; s__uncultured_bacterium_g__norank_f__Desulfovibrionaceae; OTU105	0	0	0.00667665	0	0.000171196	0	0.000171196	0	0.000128397	0.000171196	0	0	0	0.000171196	0.000256794	0.000299593	0.000128397	0	0.601186		0	0
d__Bacteria; k__norank_d__Bacteria; p__Bacteroidota; c__Bacteroidia; o__Bacteroidales; f__Muribaculaceae; g__norank_f__Muribaculaceae; s__uncultured_bacterium_g__norank_f__Muribaculaceae; OTU442	0	0	0.00136957	0	0.000641986	0	0	0.000813182	8.55981e-05	0.000171196	0	0.000342392	0	0.00243955	0.000128397	0.000128397	0.00201156	0	0.626286		4.27991e-05	0
d__Bacteria; k__norank_d__Bacteria; p__Bacteroidota; c__Bacteroidia; o__Bacteroidales; f__Muribaculaceae; g__norank_f__Muribaculaceae; s__unclassified_g__norank_f__Muribaculaceae; OTU259	0	0.000128397	0.000171196	0	0	8.55981e-05	0	4.27991e-05	0.000128397	0	0	0	0.000427991	0.0044511	0.000256794	8.55981e-05	0.00184036	0.000385192	0.00610244		0	0.000128397
d__Bacteria; k__norank_d__Bacteria; p__Bacteroidota; c__Bacteroidia; o__Bacteroidales; f__Muribaculaceae; g__Muribaculum; s__Muribaculum_intestinale; OTU97	0.00560668	0.00175476	0	0	0	0.00047079	0	4.27991e-05	4.27991e-05	0	0	4.27991e-05	0.000128397	0	0	0	0	0	0.334439		0	4.27991e-05
d__Bacteria; k__norank_d__Bacteria; p__Bacteroidota; c__Bacteroidia; o__Bacteroidales; f__Muribaculaceae; g__norank_f__Muribaculaceae; s__uncultured_bacterium_g__norank_f__Muribaculaceae; OTU65	0.00316713	0.00308153	0.000342392	4.27991e-05	0.000171196	0.000427991	0	8.55981e-05	8.55981e-05	4.27991e-05	0	0.000128397	0	4.27991e-05	0.000128397	0	0.000128397	8.55981e-05	0.0226465		0	0.000128397
d__Bacteria; k__norank_d__Bacteria; p__Firmicutes; c__Clostridia; o__Lachnospirales; f__Lachnospiraceae; g__norank_f__Lachnospiraceae; s__uncultured_bacterium_g__norank_f__Lachnospiraceae; OTU364	0	0.000171196	0	0.00184036	0.000128397	0.000641986	0	4.27991e-05	0	0	0	0	0	0.000855981	0.000128397	0.00286754	0.00132677	8.55981e-05	0.0367769		0	0
d__Bacteria; k__norank_d__Bacteria; p__Bacteroidota; c__Bacteroidia; o__Bacteroidales; f__Muribaculaceae; g__norank_f__Muribaculaceae; s__uncultured_bacterium_g__norank_f__Muribaculaceae; OTU104	0	0	0.00329553	0	0	0	0.000256794	0.00106998	0.000128397	0.000813182	0	0.00243955	0	0	0	0	4.27991e-05	0	0.035563		0	0
d__Bacteria; k__norank_d__Bacteria; p__Bacteroidota; c__Bacteroidia; o__Bacteroidales; f__Muribaculaceae; g__norank_f__Muribaculaceae; s__uncultured_bacterium_g__norank_f__Muribaculaceae; OTU402	0.000342392	0.000941579	0.00128397	0	4.27991e-05	0.000342392	0	8.55981e-05	4.27991e-05	0	0	4.27991e-05	0.000342392	0.00124117	0.000213995	8.55981e-05	0.000599187	0.00175476	0.0173416		0	0.000599187
d__Bacteria; k__norank_d__Bacteria; p__Firmicutes; c__Clostridia; o__Lachnospirales; f__Lachnospiraceae; g__Lachnospiraceae_FCS020_group; s__uncultured_bacterium_g__Lachnospiraceae_FCS020_group; OTU330	0.00102718	0.000770383	8.55981e-05	0.000641986	0.000385192	0.000213995	8.55981e-05	0	8.55981e-05	0	0	0	0.000342392	0.000128397	0.00124117	0.000984378	0.000556388	0.000855981	0.0038039		0	0.00047079
d__Bacteria; k__norank_d__Bacteria; p__Firmicutes; c__Clostridia; o__Clostridiales; f__Clostridiaceae; g__Clostridium_sensu_stricto_1; s__uncultured_bacterium_g__Clostridium_sensu_stricto_1; OTU6	0.00616306	0	0	0	0	0	0.000213995	0	0	8.55981e-05	0.000256794	0.00111278	0	0	0	0	0	0	0.0596487		0	0
d__Bacteria; k__norank_d__Bacteria; p__Firmicutes; c__Clostridia; o__Peptostreptococcales-Tissierellales; f__Peptostreptococcaceae; g__Romboutsia; s__Romboutsia_ilealis; OTU546	0	0	0.00047079	0	0	0	0.00522149	0.000684785	0.000128397	0.000641986	0.000128397	0.000299593	0	0	0	0	0	0	0.0017627		0.000256794	0
d__Bacteria; k__norank_d__Bacteria; p__Bacteroidota; c__Bacteroidia; o__Bacteroidales; f__unclassified_o__Bacteroidales; g__unclassified_o__Bacteroidales; s__unclassified_o__Bacteroidales; OTU238	0.000385192	0.000513589	0	0	0	0.000941579	0	0	0	0	0	0	0.00218275	0	0	0	0	0.00145517	0.201563		0	0.00213995
d__Bacteria; k__norank_d__Bacteria; p__Firmicutes; c__Clostridia; o__Oscillospirales; f__Oscillospiraceae; g__norank_f__Oscillospiraceae; s__unclassified_g__norank_f__Oscillospiraceae; OTU19	0.00111278	0.000256794	0.000171196	0.00166916	0.00102718	0.000513589	0	0	0.000171196	0	0	0	0	4.27991e-05	0.000984378	0.000171196	0.000299593	0.000727584	0.00614336		0	0.00047079
d__Bacteria; k__norank_d__Bacteria; p__Firmicutes; c__Clostridia; o__Lachnospirales; f__Lachnospiraceae; g__unclassified_f__Lachnospiraceae; s__unclassified_f__Lachnospiraceae; OTU149	0.000299593	0.000256794	0.000171196	0.00166916	0.000213995	0.000128397	0.000128397	0.000128397	0	0.000641986	0	4.27991e-05	8.55981e-05	0.000256794	0.00115557	0.000770383	0.00111278	0.000256794	0.0557734		0	0.000299593
d__Bacteria; k__norank_d__Bacteria; p__Firmicutes; c__Clostridia; o__Lachnospirales; f__Lachnospiraceae; g__unclassified_f__Lachnospiraceae; s__unclassified_f__Lachnospiraceae; OTU164	0	0	0	0.000171196	0.00269634	4.27991e-05	0	0	0	0	0	0	0	4.27991e-05	0.000385192	0.000427991	0.00372352	4.27991e-05	0.0247416		0	4.27991e-05
d__Bacteria; k__norank_d__Bacteria; p__Bacteroidota; c__Bacteroidia; o__Bacteroidales; f__Muribaculaceae; g__norank_f__Muribaculaceae; s__uncultured_bacterium_g__norank_f__Muribaculaceae; OTU253	0.000128397	0	0.000128397	0	0.000299593	0	0	4.27991e-05	4.27991e-05	0	0	0	0	0.00393751	0	0.000213995	0.00265354	4.27991e-05	0.242521		0	8.55981e-05
d__Bacteria; k__norank_d__Bacteria; p__Bacteroidota; c__Bacteroidia; o__Bacteroidales; f__Muribaculaceae; g__norank_f__Muribaculaceae; s__uncultured_bacterium_g__norank_f__Muribaculaceae; OTU157	0.000684785	0.000599187	0	0.00115557	0	0.00376632	0	0	0	0	0	0	4.27991e-05	0	0	0	0	0.000684785	0.0442494		0	0.000641986
d__Bacteria; k__norank_d__Bacteria; p__Bacteroidota; c__Bacteroidia; o__Bacteroidales; f__Muribaculaceae; g__norank_f__Muribaculaceae; s__uncultured_bacterium_g__norank_f__Muribaculaceae; OTU66	0.00282474	0.00393751	0.000171196	0	0	0.000171196	0.000128397	0	8.55981e-05	0	0	0	0	0	0	0	4.27991e-05	4.27991e-05	0.116722		0	0.000171196
d__Bacteria; k__norank_d__Bacteria; p__Firmicutes; c__Clostridia; o__Lachnospirales; f__Lachnospiraceae; g__unclassified_f__Lachnospiraceae; s__unclassified_f__Lachnospiraceae; OTU372	0.000256794	0.000171196	0	0.000641986	0.00047079	0	0.000385192	0.00278194	4.27991e-05	0.000385192	0	0.000171196	8.55981e-05	8.55981e-05	0.00154077	0.000213995	8.55981e-05	0.000171196	0.959357		0	8.55981e-05
d__Bacteria; k__norank_d__Bacteria; p__Bacteroidota; c__Bacteroidia; o__Bacteroidales; f__Muribaculaceae; g__norank_f__Muribaculaceae; s__unclassified_g__norank_f__Muribaculaceae; OTU90	0.00209715	0.00269634	0.000427991	4.27991e-05	0	0.000770383	0	0.000128397	8.55981e-05	0	0	4.27991e-05	0.000342392	0	4.27991e-05	0	0	0.000427991	0.111335		0	0.000299593
d__Bacteria; k__norank_d__Bacteria; p__Desulfobacterota; c__Desulfovibrionia; o__Desulfovibrionales; f__Desulfovibrionaceae; g__Desulfovibrio; s__Desulfovibrio_sp._UNSW3caefatS; OTU675	0	0	0	0	0	0	0	0	0	0.00740424	0	0	0	0	0	0	0	0	0.367879		0	0
d__Bacteria; k__norank_d__Bacteria; p__Firmicutes; c__Bacilli; o__unclassified_c__Bacilli; f__unclassified_c__Bacilli; g__unclassified_c__Bacilli; s__unclassified_c__Bacilli; OTU760	4.27991e-05	0	4.27991e-05	0	0	4.27991e-05	0.000213995	0.00175476	8.55981e-05	0.00047079	0	0.0047507	0	0	0	0	0	0	0.00681631		0	0
d__Bacteria; k__norank_d__Bacteria; p__Firmicutes; c__Clostridia; o__Lachnospirales; f__Lachnospiraceae; g__Lachnospiraceae_NK4A136_group; s__unclassified_g__Lachnospiraceae_NK4A136_group; OTU450	0	0.000256794	0	4.27991e-05	0	0	0	0	0	0	0	0	0	0.000128397	0	0	0.00697625	0	0.300687		0	0
d__Bacteria; k__norank_d__Bacteria; p__Firmicutes; c__Clostridia; o__Oscillospirales; f__Oscillospiraceae; g__norank_f__Oscillospiraceae; s__uncultured_Clostridiales_bacterium_g__norank_f__Oscillospiraceae; OTU776	4.27991e-05	8.55981e-05	0.00530708	0	0	0	0	0	0	0.000855981	0	0.00106998	0	0	0	0	0	0	0.183541		0	0
d__Bacteria; k__norank_d__Bacteria; p__Bacteroidota; c__Bacteroidia; o__Bacteroidales; f__Rikenellaceae; g__Alistipes; s__Alistipes_inops; OTU132	0	0	0.00295314	0	0.00047079	0	0	4.27991e-05	0.000299593	4.27991e-05	4.27991e-05	0	0	0.000641986	0.000385192	0.00136957	0.00111278	0	0.44181		0	0
d__Bacteria; k__norank_d__Bacteria; p__Bacteroidota; c__Bacteroidia; o__Bacteroidales; f__Muribaculaceae; g__norank_f__Muribaculaceae; s__uncultured_bacterium_g__norank_f__Muribaculaceae; OTU92	0.00372352	0.00243955	4.27991e-05	0	8.55981e-05	0.000299593	0	0.000299593	0	0	0	0.000171196	0	0	0	8.55981e-05	8.55981e-05	0	0.114525		0	0
d__Bacteria; k__norank_d__Bacteria; p__Bacteroidota; c__Bacteroidia; o__Bacteroidales; f__Muribaculaceae; g__norank_f__Muribaculaceae; s__uncultured_bacterium_g__norank_f__Muribaculaceae; OTU587	0	0	0	0	0	0	0	0.0045795	0	0.00209715	0	0.00047079	0	0	0	0	0	0	0.0345016		0	0
d__Bacteria; k__norank_d__Bacteria; p__Firmicutes; c__Bacilli; o__Lactobacillales; f__Lactobacillaceae; g__Lactobacillus; s__uncultured_bacterium_g__Lactobacillus; OTU553	0	0	8.55981e-05	0	0.000128397	0	0.0044939	0.000342392	0.000128397	0.00089878	0	0.000855981	0	0	0.000128397	0	0	0	0.0170578		4.27991e-05	0
d__Bacteria; k__norank_d__Bacteria; p__Firmicutes; c__Clostridia; o__Lachnospirales; f__Lachnospiraceae; g__unclassified_f__Lachnospiraceae; s__unclassified_f__Lachnospiraceae; OTU178	0.000299593	8.55981e-05	0	0	0.000641986	0.000213995	4.27991e-05	0	4.27991e-05	0	0	8.55981e-05	0	4.27991e-05	0.00385192	0.00102718	0.000727584	0	0.304088		0	0
d__Bacteria; k__norank_d__Bacteria; p__Firmicutes; c__Clostridia; o__Clostridia_vadinBB60_group; f__norank_o__Clostridia_vadinBB60_group; g__norank_f__norank_o__Clostridia_vadinBB60_group; s__uncultured_bacterium_g__norank_f__norank_o__Clostridia_vadinBB60_group; OTU448	0	0	0	0	4.27991e-05	0	0	0	0	0	0	0	0	0.00124117	0.00102718	0.00089878	0.00380912	0	0.0216911		4.27991e-05	0
d__Bacteria; k__norank_d__Bacteria; p__Firmicutes; c__Clostridia; o__Lachnospirales; f__Lachnospiraceae; g__unclassified_f__Lachnospiraceae; s__unclassified_f__Lachnospiraceae; OTU283	4.27991e-05	0.000342392	0	0.000171196	0.000427991	0.000171196	0	4.27991e-05	0	0.000128397	0	0	0.000213995	0.00359512	0.000770383	0.000385192	0.000213995	0.000213995	0.00485062		0	0.000342392
d__Bacteria; k__norank_d__Bacteria; p__Firmicutes; c__Clostridia; o__Lachnospirales; f__Lachnospiraceae; g__norank_f__Lachnospiraceae; s__Clostridium_sp._Culture-54; OTU156	0.000641986	0.00124117	8.55981e-05	0.000427991	0.000556388	8.55981e-05	4.27991e-05	8.55981e-05	0	0	0	0	0.000684785	8.55981e-05	0.00149797	0.000385192	0.000171196	0.00102718	0.00454611		0	0
d__Bacteria; k__norank_d__Bacteria; p__Bacteroidota; c__Bacteroidia; o__Bacteroidales; f__Muribaculaceae; g__norank_f__Muribaculaceae; s__uncultured_bacterium_g__norank_f__Muribaculaceae; OTU123	0	0	0.00667665	0	0	0	0	4.27991e-05	0.000128397	0	0	0	0	0	0	0	0	0	0.363706		0	0
d__Bacteria; k__norank_d__Bacteria; p__Bacteroidota; c__Bacteroidia; o__Bacteroidales; f__Muribaculaceae; g__norank_f__Muribaculaceae; s__uncultured_bacterium_g__norank_f__Muribaculaceae; OTU584	0	0	0	0	0	0	0.000342392	0.00577787	0	0.000513589	0	0.000171196	0	0	0	0	0	0	0.00854298		0	0
d__Bacteria; k__norank_d__Bacteria; p__Bacteroidota; c__Bacteroidia; o__Bacteroidales; f__Muribaculaceae; g__norank_f__Muribaculaceae; s__uncultured_bacterium_g__norank_f__Muribaculaceae; OTU726	0	0	0.00389471	0	0	0	0	0	8.55981e-05	0	4.27991e-05	0.000213995	0	0.00222555	0.000128397	0	8.55981e-05	0	0.612302		0	0
d__Bacteria; k__norank_d__Bacteria; p__Bacteroidota; c__Bacteroidia; o__Bacteroidales; f__Muribaculaceae; g__norank_f__Muribaculaceae; s__uncultured_bacterium_g__norank_f__Muribaculaceae; OTU95	0.000427991	0.00119837	0	0.000171196	0	0.000770383	0	0	0	0	0	0	0.000727584	0	0	0	0	0.00201156	0.0886867		0	0.00128397
d__Bacteria; k__norank_d__Bacteria; p__Bacteroidota; c__Bacteroidia; o__Bacteroidales; f__Muribaculaceae; g__norank_f__Muribaculaceae; s__uncultured_bacterium_g__norank_f__Muribaculaceae; OTU98	0.00102718	0.00128397	0	0.000342392	0.000385192	0.00136957	4.27991e-05	0	8.55981e-05	0.000128397	0	0.000813182	0	0.000128397	0.000513589	0	0.000427991	0	0.147386		4.27991e-05	0
d__Bacteria; k__norank_d__Bacteria; p__Firmicutes; c__Bacilli; o__Staphylococcales; f__Staphylococcaceae; g__Jeotgalicoccus; s__uncultured_bacterium_g__Jeotgalicoccus; OTU813	0	0	0	0	0	0	0	4.27991e-05	0	0	0.00517869	0.000385192	0	0	0	0	0	0	0.0345016		0.000855981	0
d__Bacteria; k__norank_d__Bacteria; p__Firmicutes; c__Clostridia; o__Lachnospirales; f__Lachnospiraceae; g__Roseburia; s__Eubacterium_sp._14-2; OTU34	0.0047507	0	0.000641986	4.27991e-05	0	0	0	0.000128397	0	0	0	0	0	8.55981e-05	0.000556388	0	8.55981e-05	0	0.428063		0	0
d__Bacteria; k__norank_d__Bacteria; p__Bacteroidota; c__Bacteroidia; o__Bacteroidales; f__Muribaculaceae; g__norank_f__Muribaculaceae; s__uncultured_bacterium_g__norank_f__Muribaculaceae; OTU69	0.000556388	0.000813182	0.000171196	0.000342392	0	0.00188316	0	0	0.000385192	0	0	8.55981e-05	8.55981e-05	0.000171196	4.27991e-05	8.55981e-05	0.000171196	0.000513589	0.0532533		0	0.000984378
d__Bacteria; k__norank_d__Bacteria; p__Firmicutes; c__Bacilli; o__Lactobacillales; f__Enterococcaceae; g__Enterococcus; s__Enterococcus_faecalis_g__Enterococcus; OTU804	0	0	0	0	0	0	8.55981e-05	8.55981e-05	0	8.55981e-05	0.000427991	0.000299593	0	0.000128397	4.27991e-05	0	4.27991e-05	0	0.0128247		0.00505029	0
d__Bacteria; k__norank_d__Bacteria; p__Bacteroidota; c__Bacteroidia; o__Bacteroidales; f__Rikenellaceae; g__Alistipes; s__uncultured_bacterium_g__Alistipes; OTU627	0	0	0.000599187	0	0.00119837	0	0	8.55981e-05	0.00047079	0	0	0	0	0.000984378	0.000984378	0.00089878	0.000984378	0	0.22916		0	0
d__Bacteria; k__norank_d__Bacteria; p__Bacteroidota; c__Bacteroidia; o__Bacteroidales; f__Muribaculaceae; g__norank_f__Muribaculaceae; s__uncultured_bacterium_g__norank_f__Muribaculaceae; OTU641	0.000427991	0.000385192	0.000171196	0	0.000213995	0.000599187	0	0.000128397	0.000171196	4.27991e-05	0	0	0	0.00124117	8.55981e-05	0.000213995	0.00145517	0.000513589	0.0656033		0	0.00047079
d__Bacteria; k__norank_d__Bacteria; p__Bacteroidota; c__Bacteroidia; o__Bacteroidales; f__Muribaculaceae; g__norank_f__Muribaculaceae; s__uncultured_bacterium_g__norank_f__Muribaculaceae; OTU256	4.27991e-05	0	0.000128397	0	4.27991e-05	0	0	0	0.000427991	0	0	0	0.00171196	0.00162636	0.000256794	0.000385192	0.000813182	0.000427991	0.00421406		0	0.000256794
d__Bacteria; k__norank_d__Bacteria; p__Firmicutes; c__Clostridia; o__Clostridia_UCG-014; f__norank_o__Clostridia_UCG-014; g__norank_f__norank_o__Clostridia_UCG-014; s__unclassified_g__norank_f__norank_o__Clostridia_UCG-014; OTU678	0	0	0	0	0	0	0.00154077	0.00047079	0	0.00410871	0	0	0	0	0	0	0	0	0.0345016		0	0
d__Bacteria; k__norank_d__Bacteria; p__Firmicutes; c__Clostridia; o__Peptostreptococcales-Tissierellales; f__Anaerovoracaceae; g__Family_XIII_UCG-001; s__uncultured_bacterium_g__Family_XIII_UCG-001; OTU345	0.000342392	0.000128397	8.55981e-05	0.00184036	0.000984378	0.000213995	0	0.000342392	0	8.55981e-05	4.27991e-05	0	0.000128397	8.55981e-05	0.000213995	0.000427991	0.000684785	0.000299593	0.0333831		0	0.000171196
d__Bacteria; k__norank_d__Bacteria; p__Bacteroidota; c__Bacteroidia; o__Bacteroidales; f__unclassified_o__Bacteroidales; g__unclassified_o__Bacteroidales; s__unclassified_o__Bacteroidales; OTU637	4.27991e-05	0	0.000256794	0	4.27991e-05	4.27991e-05	0	0	0.000213995	0	0	0	4.27991e-05	0.0045795	0.000256794	0.000385192	8.55981e-05	4.27991e-05	0.0192579		0	4.27991e-05
d__Bacteria; k__norank_d__Bacteria; p__Bacteroidota; c__Bacteroidia; o__Bacteroidales; f__Prevotellaceae; g__Prevotellaceae_NK3B31_group; s__uncultured_bacterium_g__Prevotellaceae_NK3B31_group; OTU512	0	0	0	0	0	0	0	0	0	0	0	0	0.00141237	0	0	0	0	0.00209715	0.120314		0	0.00239675
d__Bacteria; k__norank_d__Bacteria; p__Bacteroidota; c__Bacteroidia; o__Bacteroidales; f__Muribaculaceae; g__norank_f__Muribaculaceae; s__uncultured_bacterium_g__norank_f__Muribaculaceae; OTU476	0.000256794	4.27991e-05	0.000128397	4.27991e-05	4.27991e-05	0.000342392	0	4.27991e-05	0.000385192	0	0	0	0.000256794	0.000256794	0.000385192	8.55981e-05	4.27991e-05	0.00136957	0.0509237		0	0.00222555
d__Bacteria; k__norank_d__Bacteria; p__Firmicutes; c__Clostridia; o__Oscillospirales; f__Oscillospiraceae; g__norank_f__Oscillospiraceae; s__uncultured_bacterium_g__norank_f__Oscillospiraceae; OTU412	8.55981e-05	0.000171196	0	0	8.55981e-05	0	0	0	0	0	0	0	0	0.000171196	8.55981e-05	0.00286754	0.00243955	0	0.0494591		0	0
d__Bacteria; k__norank_d__Bacteria; p__Firmicutes; c__Clostridia; o__Lachnospirales; f__Lachnospiraceae; g__Roseburia; s__uncultured_bacterium_g__Roseburia; OTU484	0.000513589	0.000427991	0	0.00047079	0.00047079	0.000213995	0	0	4.27991e-05	8.55981e-05	4.27991e-05	0	0.000299593	0	0.000256794	0	0.00184036	0.00106998	0.0932226		4.27991e-05	8.55981e-05
d__Bacteria; k__norank_d__Bacteria; p__Firmicutes; c__Clostridia; o__Lachnospirales; f__Lachnospiraceae; g__unclassified_f__Lachnospiraceae; s__unclassified_f__Lachnospiraceae; OTU447	4.27991e-05	0.000171196	0	8.55981e-05	0	0	0	0	0	0	0	0	0	0.00273914	4.27991e-05	0	0.00278194	0	0.12844		0	0
d__Bacteria; k__norank_d__Bacteria; p__Firmicutes; c__Clostridia; o__unclassified_c__Clostridia; f__unclassified_c__Clostridia; g__unclassified_c__Clostridia; s__unclassified_c__Clostridia; OTU438	0	0.000171196	4.27991e-05	0.000128397	0.000256794	4.27991e-05	0	0	0	0	0	0	0	0.000684785	4.27991e-05	0.00124117	0.00316713	0	0.0251812		0	4.27991e-05
d__Bacteria; k__norank_d__Bacteria; p__Firmicutes; c__Clostridia; o__Lachnospirales; f__Lachnospiraceae; g__Roseburia; s__uncultured_bacterium_g__Roseburia; OTU33	0.000385192	0.000385192	0	0.00171196	0	0	0.000427991	0	4.27991e-05	0	0	4.27991e-05	0	0.00278194	0	0	4.27991e-05	0	0.821348		0	0
d__Bacteria; k__norank_d__Bacteria; p__Firmicutes; c__Negativicutes; o__Acidaminococcales; f__Acidaminococcaceae; g__Phascolarctobacterium; s__uncultured_bacterium_g__Phascolarctobacterium; OTU679	0	0	0	0	0	0	0	0	0	0.00569227	0.000128397	0	0	0	0	0	0	0	0.120314		0	0
d__Bacteria; k__norank_d__Bacteria; p__Actinobacteriota; c__Coriobacteriia; o__Coriobacteriales; f__Eggerthellaceae; g__unclassified_f__Eggerthellaceae; s__unclassified_f__Eggerthellaceae; OTU684	0	0	0	0	0	0	0.0045367	4.27991e-05	0	0.000941579	0	0.000213995	0	4.27991e-05	0	0	0	0	0.0248693		0	0
d__Bacteria; k__norank_d__Bacteria; p__Firmicutes; c__Clostridia; o__Lachnospirales; f__Lachnospiraceae; g__norank_f__Lachnospiraceae; s__unclassified_g__norank_f__Lachnospiraceae; OTU175	4.27991e-05	0.000941579	0	0.000813182	0.00132677	0	0	0	0	0	0	0	0	0	0.000855981	0	0.00175476	0	0.0886867		0	0
d__Bacteria; k__norank_d__Bacteria; p__Firmicutes; c__Bacilli; o__Lactobacillales; f__Aerococcaceae; g__Facklamia; s__Facklamia_tabacinasalis; OTU801	0	0	0	0	0	0	4.27991e-05	0	8.55981e-05	0	0.00479349	0	0	0	0	0	0	0	0.0345016		0.000813182	0
d__Bacteria; k__norank_d__Bacteria; p__Bacteroidota; c__Bacteroidia; o__Bacteroidales; f__Muribaculaceae; g__norank_f__Muribaculaceae; s__uncultured_bacterium_g__norank_f__Muribaculaceae; OTU261	0	0	0.000342392	0	0.000128397	0	0	0	0.00111278	0	0	0	0.000727584	0.00231115	8.55981e-05	0.000641986	8.55981e-05	0.000171196	0.0328862		0	8.55981e-05
d__Bacteria; k__norank_d__Bacteria; p__Firmicutes; c__Clostridia; o__Oscillospirales; f__Oscillospiraceae; g__NK4A214_group; s__unclassified_g__NK4A214_group; OTU53	0.00162636	0.00124117	0.000299593	0	0	8.55981e-05	4.27991e-05	0	0.000256794	0.000342392	0	0	0.000213995	0.00047079	0.000213995	0	0.000256794	0.00047079	0.406235		0	0
d__Bacteria; k__norank_d__Bacteria; p__Bacteroidota; c__Bacteroidia; o__Bacteroidales; f__Muribaculaceae; g__norank_f__Muribaculaceae; s__unclassified_g__norank_f__Muribaculaceae; OTU327	0.000171196	0.000128397	4.27991e-05	4.27991e-05	8.55981e-05	0.00106998	0	0	0.000727584	0	0	0.000342392	0.000171196	0.00047079	0.00209715	0	0.000128397	0	0.461624		0	0
d__Bacteria; k__norank_d__Bacteria; p__Bacteroidota; c__Bacteroidia; o__Bacteroidales; f__Muribaculaceae; g__norank_f__Muribaculaceae; s__uncultured_bacterium_g__norank_f__Muribaculaceae; OTU386	8.55981e-05	0.000213995	0.000342392	0	4.27991e-05	4.27991e-05	0	0	0	0	0	0	0.000342392	0.00303873	4.27991e-05	4.27991e-05	0.000684785	0.000342392	0.00289967		0	0.000213995
d__Bacteria; k__norank_d__Bacteria; p__Proteobacteria; c__Gammaproteobacteria; o__Burkholderiales; f__Burkholderiaceae; g__Ralstonia; s__Ralstonia_mannitolilytica; OTU832	0	0	0	0	0	0	0	0	0	0	0.00410871	0	0	0	0	0	4.27991e-05	4.27991e-05	0.362805		0.00119837	0
d__Bacteria; k__norank_d__Bacteria; p__Firmicutes; c__Clostridia; o__Lachnospirales; f__Lachnospiraceae; g__Lachnoclostridium; s__Lachnoclostridium_sp._YL32; OTU740	0	0	0	0	0	0	0	0	0	4.27991e-05	0.00526428	0	0	0	0	0	0	0	0.120314		0	0
d__Bacteria; k__norank_d__Bacteria; p__Firmicutes; c__Clostridia; o__Lachnospirales; f__Lachnospiraceae; g__norank_f__Lachnospiraceae; s__uncultured_bacterium_g__norank_f__Lachnospiraceae; OTU405	4.27991e-05	0.000299593	8.55981e-05	0	0	0	0.000128397	0	0	0	0	0	0	0.00162636	0.00141237	4.27991e-05	0.00162636	0	0.162983		0	0
d__Bacteria; k__norank_d__Bacteria; p__Bacteroidota; c__Bacteroidia; o__Bacteroidales; f__Muribaculaceae; g__norank_f__Muribaculaceae; s__uncultured_bacterium_g__norank_f__Muribaculaceae; OTU428	0	0	0.000128397	0	0.000385192	0	0	0.000855981	0.000256794	0.000213995	0	0.000342392	0	0.000342392	0.00047079	4.27991e-05	0.00209715	4.27991e-05	0.280694		0	4.27991e-05
d__Bacteria; k__norank_d__Bacteria; p__Firmicutes; c__Clostridia; o__Lachnospirales; f__Lachnospiraceae; g__Lachnospiraceae_NK4A136_group; s__unclassified_g__Lachnospiraceae_NK4A136_group; OTU37	0.00184036	0.00111278	0	8.55981e-05	0	0	0	4.27991e-05	0.000385192	0	0	0	0	0	0.00162636	0	0	0	0.482855		0.000128397	0
d__Bacteria; k__norank_d__Bacteria; p__Bacteroidota; c__Bacteroidia; o__Bacteroidales; f__Muribaculaceae; g__norank_f__Muribaculaceae; s__uncultured_bacterium_g__norank_f__Muribaculaceae; OTU5	0.00278194	0.00179756	0	0	4.27991e-05	0.000213995	4.27991e-05	0	4.27991e-05	4.27991e-05	0	4.27991e-05	0	4.27991e-05	0	4.27991e-05	4.27991e-05	4.27991e-05	0.471497		0	0
d__Bacteria; k__norank_d__Bacteria; p__Bacteroidota; c__Bacteroidia; o__Bacteroidales; f__Prevotellaceae; g__Prevotellaceae_UCG-001; s__uncultured_Bacteroidales_bacterium_g__Prevotellaceae_UCG-001; OTU579	0	0	0	0	0	0	0.000599187	0.00342392	0	0.00111278	0	0	0	0	0	0	0	0	0.0345016		0	0
d__Bacteria; k__norank_d__Bacteria; p__Bacteroidota; c__Bacteroidia; o__Bacteroidales; f__Muribaculaceae; g__norank_f__Muribaculaceae; s__uncultured_bacterium_g__norank_f__Muribaculaceae; OTU414	4.27991e-05	0.000128397	0.00303873	8.55981e-05	0	0	0	0	4.27991e-05	0	0	0.000128397	0.000213995	0.000342392	0	0	0.000171196	0.000684785	0.204922		0	0.000213995
d__Bacteria; k__norank_d__Bacteria; p__Firmicutes; c__Clostridia; o__Oscillospirales; f__Oscillospiraceae; g__norank_f__Oscillospiraceae; s__uncultured_bacterium_g__norank_f__Oscillospiraceae; OTU338	0	0.000128397	0	4.27991e-05	0.00162636	0	0	0	4.27991e-05	0	0	0	0	0.000256794	0.000385192	0.00205435	0.000513589	0	0.114583		0	0
d__Bacteria; k__norank_d__Bacteria; p__Firmicutes; c__Clostridia; o__Lachnospirales; f__Lachnospiraceae; g__unclassified_f__Lachnospiraceae; s__unclassified_f__Lachnospiraceae; OTU668	8.55981e-05	0.000342392	4.27991e-05	0.000513589	0	4.27991e-05	0.000213995	0.000171196	0	0.00179756	0	0	0.000171196	0.000513589	4.27991e-05	0	0.000599187	4.27991e-05	0.845504		0	0.000427991
d__Bacteria; k__norank_d__Bacteria; p__Bacteroidota; c__Bacteroidia; o__Bacteroidales; f__unclassified_o__Bacteroidales; g__unclassified_o__Bacteroidales; s__unclassified_o__Bacteroidales; OTU266	0	0	0.000256794	0	0.000128397	0.000128397	0	0	0.000770383	0	0	0	8.55981e-05	0.00175476	0.000128397	0.00102718	4.27991e-05	0	0.16029		0	0.000599187
d__Bacteria; k__norank_d__Bacteria; p__Bacteroidota; c__Bacteroidia; o__Bacteroidales; f__Muribaculaceae; g__norank_f__Muribaculaceae; s__uncultured_bacterium_g__norank_f__Muribaculaceae; OTU203	0.00184036	0.00256794	0	8.55981e-05	0	0.000171196	0	4.27991e-05	0	0	0	4.27991e-05	0	0	0	4.27991e-05	0	8.55981e-05	0.130852		0	4.27991e-05
d__Bacteria; k__norank_d__Bacteria; p__Bacteroidota; c__Bacteroidia; o__Bacteroidales; f__Muribaculaceae; g__norank_f__Muribaculaceae; s__uncultured_bacterium_g__norank_f__Muribaculaceae; OTU59	0.00145517	0.00141237	0	0.000813182	0	0.000855981	0	0	0	0	0	0	0	4.27991e-05	0	0	0	0.000213995	0.0327696		0	0
d__Bacteria; k__norank_d__Bacteria; p__Firmicutes; c__Clostridia; o__Clostridia_UCG-014; f__norank_o__Clostridia_UCG-014; g__norank_f__norank_o__Clostridia_UCG-014; s__uncultured_bacterium_g__norank_f__norank_o__Clostridia_UCG-014; OTU146	0.000171196	0	0.000171196	0.000256794	0.000256794	4.27991e-05	0.000984378	0.000556388	0	0.00175476	0	0	0.000171196	8.55981e-05	4.27991e-05	0.000171196	0.000128397	0	0.77218		0	0
d__Bacteria; k__norank_d__Bacteria; p__Firmicutes; c__Clostridia; o__Clostridia_UCG-014; f__norank_o__Clostridia_UCG-014; g__norank_f__norank_o__Clostridia_UCG-014; s__uncultured_bacterium_g__norank_f__norank_o__Clostridia_UCG-014; OTU685	0	0	0	0	0	0	8.55981e-05	0	0	0.0047079	0	0	0	0	0	0	0	0	0.120314		0	0
d__Bacteria; k__norank_d__Bacteria; p__Firmicutes; c__Clostridia; o__Lachnospirales; f__Lachnospiraceae; g__norank_f__Lachnospiraceae; s__uncultured_bacterium_g__norank_f__Lachnospiraceae; OTU174	0	0	0	0	0.0043227	0	0.000427991	0	0	0	0	0	0	0	0	0	0	0	0.586071		0	0
d__Bacteria; k__norank_d__Bacteria; p__Firmicutes; c__Clostridia; o__Lachnospirales; f__Lachnospiraceae; g__Roseburia; s__uncultured_bacterium_g__Roseburia; OTU190	0.00115557	0	0	0	0.00136957	0.000171196	0	0	0	0	0	0	0	0	0.00205435	0	0	0	0.163524		0	0
d__Bacteria; k__norank_d__Bacteria; p__Firmicutes; c__Clostridia; o__Oscillospirales; f__Ruminococcaceae; g__norank_f__Ruminococcaceae; s__unclassified_g__norank_f__Ruminococcaceae; OTU300	0	8.55981e-05	0	0.00235395	0.000599187	4.27991e-05	0.000213995	4.27991e-05	0	8.55981e-05	0	4.27991e-05	4.27991e-05	0.000213995	0.000427991	0.000171196	4.27991e-05	0.000256794	0.318376		0	0.000128397
d__Bacteria; k__norank_d__Bacteria; p__Proteobacteria; c__Gammaproteobacteria; o__Enterobacterales; f__Morganellaceae; g__Proteus; s__Proteus_mirabilis; OTU712	0	0	0	0	0	0	0	8.55981e-05	0	0.000299593	0.00423711	8.55981e-05	0	4.27991e-05	0	0	0	0	0.0215539		0	0
d__Bacteria; k__norank_d__Bacteria; p__Bacteroidota; c__Bacteroidia; o__Bacteroidales; f__Muribaculaceae; g__norank_f__Muribaculaceae; s__uncultured_bacterium_g__norank_f__Muribaculaceae; OTU756	0	0	0.00415151	0	0	0	0	8.55981e-05	8.55981e-05	4.27991e-05	0	0.000385192	0	0	0	0	0	0	0.0593709		0	0
d__Bacteria; k__norank_d__Bacteria; p__Bacteroidota; c__Bacteroidia; o__Bacteroidales; f__Muribaculaceae; g__norank_f__Muribaculaceae; s__uncultured_bacterium_g__norank_f__Muribaculaceae; OTU18	0.000984378	0.000299593	8.55981e-05	0.000171196	0	0.000171196	0	0	0.000984378	4.27991e-05	0	0	0	0.000128397	0.000299593	8.55981e-05	0.000128397	0.000599187	0.199516		0	0.000727584
d__Bacteria; k__norank_d__Bacteria; p__Bacteroidota; c__Bacteroidia; o__Bacteroidales; f__Muribaculaceae; g__norank_f__Muribaculaceae; s__uncultured_bacterium_g__norank_f__Muribaculaceae; OTU444	0	0	0	0	0.00111278	0	0	0.000427991	4.27991e-05	4.27991e-05	0	4.27991e-05	0	0.000171196	0.000213995	4.27991e-05	0.00256794	0	0.287132		0	0
d__Bacteria; k__norank_d__Bacteria; p__Firmicutes; c__Clostridia; o__Peptostreptococcales-Tissierellales; f__Anaerovoracaceae; g__Eubacterium_nodatum_group; s__unclassified_g__Eubacterium_nodatum_group; OTU518	0.000684785	0.000171196	0.000342392	8.55981e-05	0	0.000171196	0	8.55981e-05	8.55981e-05	0	0	0	0.000855981	0.000641986	0.000299593	4.27991e-05	0.000128397	0.000385192	0.0175992		0	0.000641986
d__Bacteria; k__norank_d__Bacteria; p__Bacteroidota; c__Bacteroidia; o__Bacteroidales; f__Muribaculaceae; g__norank_f__Muribaculaceae; s__uncultured_bacterium_g__norank_f__Muribaculaceae; OTU257	0.000213995	0.000128397	4.27991e-05	0	0.000213995	0.000385192	0	4.27991e-05	0.000684785	0	0	0	0	0.000641986	0.00162636	0.000171196	0.000171196	0.000213995	0.176273		0	8.55981e-05
d__Bacteria; k__norank_d__Bacteria; p__Deferribacterota; c__Deferribacteres; o__Deferribacterales; f__Deferribacteraceae; g__Mucispirillum; s__Mucispirillum_schaedleri; OTU366	0	4.27991e-05	0	0	8.55981e-05	0	0	0	0	0	0	0	4.27991e-05	8.55981e-05	0.000213995	0.00171196	0.00239675	0	0.0103135		0	4.27991e-05
d__Bacteria; k__norank_d__Bacteria; p__Bacteroidota; c__Bacteroidia; o__Bacteroidales; f__Muribaculaceae; g__norank_f__Muribaculaceae; s__unclassified_g__norank_f__Muribaculaceae; OTU571	0	0	0	0	8.55981e-05	0	8.55981e-05	0.00239675	0	0.000256794	0	0.000299593	0.000213995	4.27991e-05	4.27991e-05	0	0.000641986	0.000256794	0.0780315		0	0.000299593
d__Bacteria; k__norank_d__Bacteria; p__Firmicutes; c__Clostridia; o__Lachnospirales; f__Lachnospiraceae; g__norank_f__Lachnospiraceae; s__uncultured_bacterium_g__norank_f__Lachnospiraceae; OTU367	0.000128397	8.55981e-05	0.000171196	0.00235395	0	8.55981e-05	0	4.27991e-05	0	0	0	8.55981e-05	0	0.000556388	0.000256794	0.000727584	0.000128397	0	0.084075		0	0
d__Bacteria; k__norank_d__Bacteria; p__Bacteroidota; c__Bacteroidia; o__Bacteroidales; f__Muribaculaceae; g__norank_f__Muribaculaceae; s__unclassified_g__norank_f__Muribaculaceae; OTU91	0.000684785	0.00136957	0	0.00179756	0	0.000256794	0	0	0	0	0	0	4.27991e-05	0	0	0	0	0.000427991	0.0403229		0	0
d__Bacteria; k__norank_d__Bacteria; p__Bacteroidota; c__Bacteroidia; o__Bacteroidales; f__Muribaculaceae; g__norank_f__Muribaculaceae; s__uncultured_bacterium_g__norank_f__Muribaculaceae; OTU467	0.000256794	0.000727584	0.000171196	0.000171196	0	0.00111278	0	0	0.000556388	8.55981e-05	0	0	0.000256794	0	0	0	8.55981e-05	0.000299593	0.158451		0	0.000813182
d__Bacteria; k__norank_d__Bacteria; p__Bacteroidota; c__Bacteroidia; o__Bacteroidales; f__Muribaculaceae; g__norank_f__Muribaculaceae; s__unclassified_g__norank_f__Muribaculaceae; OTU755	0	0	0.00338113	0	0	0	4.27991e-05	0	0.000171196	0	0	0.00089878	0	0	0	0	0	0	0.163524		0	0
d__Bacteria; k__norank_d__Bacteria; p__Bacteroidota; c__Bacteroidia; o__Bacteroidales; f__Muribaculaceae; g__norank_f__Muribaculaceae; s__unclassified_g__norank_f__Muribaculaceae; OTU600	0	4.27991e-05	0	0	0	0	0	0.00415151	0	0.000213995	0	4.27991e-05	0	0	0	0	4.27991e-05	0	0.250068		0	0
d__Bacteria; k__norank_d__Bacteria; p__Firmicutes; c__Clostridia; o__Oscillospirales; f__Ruminococcaceae; g__norank_f__Ruminococcaceae; s__Clostridium_leptum_g__norank; OTU423	0.000128397	0.000213995	0.000128397	0.000256794	0.000256794	4.27991e-05	0	4.27991e-05	0	0	0	0	4.27991e-05	0.000727584	0.000813182	0.000256794	0.00145517	4.27991e-05	0.00363694		0	4.27991e-05
d__Bacteria; k__norank_d__Bacteria; p__Bacteroidota; c__Bacteroidia; o__Bacteroidales; f__Muribaculaceae; g__norank_f__Muribaculaceae; s__uncultured_bacterium_g__norank_f__Muribaculaceae; OTU452	0	0	0	0	0.00089878	0	0	0.000128397	4.27991e-05	4.27991e-05	0	0	0	0.000128397	0.000256794	0.000128397	0.00278194	0	0.221946		0	0
d__Bacteria; k__norank_d__Bacteria; p__Bacteroidota; c__Bacteroidia; o__Bacteroidales; f__unclassified_o__Bacteroidales; g__unclassified_o__Bacteroidales; s__unclassified_o__Bacteroidales; OTU82	0.000813182	0.000727584	0	4.27991e-05	0	0.00047079	0	0	0	0	0	0	0.000342392	0	0	0	0	0.000727584	0.0627285		0	0.00119837
d__Bacteria; k__norank_d__Bacteria; p__Actinobacteriota; c__Coriobacteriia; o__Coriobacteriales; f__Atopobiaceae; g__Coriobacteriaceae_UCG-002; s__uncultured_bacterium_g__Coriobacteriaceae_UCG-002; OTU529	0	0	0.000641986	0	0	0	0.00106998	0.000342392	0	0.000813182	4.27991e-05	0.000299593	8.55981e-05	0	0	0	0	0.000213995	0.0528226		0.000171196	0.000641986
d__Bacteria; k__norank_d__Bacteria; p__Desulfobacterota; c__Desulfovibrionia; o__Desulfovibrionales; f__Desulfovibrionaceae; g__Desulfovibrio; s__Desulfovibrio_fairfieldensis; OTU524	0	0	8.55981e-05	0	4.27991e-05	0	0.000213995	0.00106998	0	0.00175476	0	0.000427991	0	0	0.00047079	0.000171196	4.27991e-05	0	0.184709		0	0
d__Bacteria; k__norank_d__Bacteria; p__Proteobacteria; c__Gammaproteobacteria; o__Aeromonadales; f__Aeromonadaceae; g__Oceanisphaera; s__uncultured_proteobacterium_g__Oceanisphaera; OTU714	0	0	0	0	0	0	0	0	0	0	0.00427991	0	0	0	0	0	0	0	0.367879		0	0
d__Bacteria; k__norank_d__Bacteria; p__Bacteroidota; c__Bacteroidia; o__Bacteroidales; f__Muribaculaceae; g__norank_f__Muribaculaceae; s__unclassified_g__norank_f__Muribaculaceae; OTU328	0	0	0	0	0.000641986	0	0	0	0.000213995	0	0	8.55981e-05	0	0.000128397	0.00273914	0	0.00047079	0	0.482855		0	0
d__Bacteria; k__norank_d__Bacteria; p__Firmicutes; c__Clostridia; o__Lachnospirales; f__Lachnospiraceae; g__Lachnospiraceae_UCG-001; s__unclassified_g__Lachnospiraceae_UCG-001; OTU548	0	0	0	0	0.000513589	0	0.000941579	0	8.55981e-05	0.00261074	0	0	0	0	4.27991e-05	8.55981e-05	0	0	0.387015		0	0
d__Bacteria; k__norank_d__Bacteria; p__Firmicutes; c__Clostridia; o__Lachnospirales; f__Lachnospiraceae; g__Lachnospiraceae_NK4A136_group; s__uncultured_bacterium_g__Lachnospiraceae_NK4A136_group; OTU219	0	0.000385192	0	4.27991e-05	0	0.00119837	0	0	0	0	0	0	4.27991e-05	0	0	0	0	0.00196876	0.176699		0	0.000599187
d__Bacteria; k__norank_d__Bacteria; p__Firmicutes; c__Clostridia; o__Monoglobales; f__Monoglobaceae; g__Monoglobus; s__uncultured_organism_g__Monoglobus; OTU752	0	4.27991e-05	0	0.000128397	0	0	0.000256794	0.000213995	0	0.000984378	0	0.00256794	0	0	0	0	0	0	0.0327696		0	0
d__Bacteria; k__norank_d__Bacteria; p__Firmicutes; c__Bacilli; o__Erysipelotrichales; f__Erysipelotrichaceae; g__unclassified_f__Erysipelotrichaceae; s__unclassified_f__Erysipelotrichaceae; OTU120	0	0	0.00363792	0	0	0	0.000256794	0.000256794	0	0	0	4.27991e-05	0	0	0	0	0	0	0.162947		0	0
d__Bacteria; k__norank_d__Bacteria; p__Bacteroidota; c__Bacteroidia; o__Bacteroidales; f__Muribaculaceae; g__norank_f__Muribaculaceae; s__unclassified_g__norank_f__Muribaculaceae; OTU471	0.000513589	0.000342392	0	0	0.000171196	0.000427991	0	0	4.27991e-05	0	0	8.55981e-05	0.000556388	0.000299593	0.000128397	8.55981e-05	0.000385192	0.000941579	0.0200429		0	0.000213995
d__Bacteria; k__norank_d__Bacteria; p__Bacteroidota; c__Bacteroidia; o__Bacteroidales; f__Muribaculaceae; g__norank_f__Muribaculaceae; s__uncultured_bacterium_g__norank_f__Muribaculaceae; OTU279	8.55981e-05	0.000770383	0.000299593	0	4.27991e-05	0.000213995	0	0	0.000299593	0	0	0	0.000256794	0.000684785	8.55981e-05	0.000342392	0.000256794	0.000427991	0.0263774		0	0.000427991
d__Bacteria; k__norank_d__Bacteria; p__Firmicutes; c__Clostridia; o__Oscillospirales; f__Ruminococcaceae; g__unclassified_f__Ruminococcaceae; s__unclassified_f__Ruminococcaceae; OTU272	0	0	0	0	0.00115557	0	4.27991e-05	0	0.000213995	4.27991e-05	0	0	0	0.00154077	0	0.000128397	0.00102718	0	0.50188		0	0
d__Bacteria; k__norank_d__Bacteria; p__Firmicutes; c__Clostridia; o__Lachnospirales; f__Lachnospiraceae; g__norank_f__Lachnospiraceae; s__uncultured_bacterium_g__norank_f__Lachnospiraceae; OTU762	0	0	4.27991e-05	0	0.000684785	0	0	4.27991e-05	0	0	0	0.000727584	0	0.000171196	0.00179756	0.00047079	0.000213995	0	0.353764		0	0
d__Bacteria; k__norank_d__Bacteria; p__Firmicutes; c__Bacilli; o__Erysipelotrichales; f__Erysipelatoclostridiaceae; g__Erysipelatoclostridium; s__unclassified_g__Erysipelatoclostridium; OTU15	0.000941579	0.000128397	0	0	0	8.55981e-05	0	0	0	0.000213995	0	0	0.000641986	0	0	0	4.27991e-05	0.000641986	0.441233		0	0.00145517
d__Bacteria; k__norank_d__Bacteria; p__Firmicutes; c__Clostridia; o__Lachnospirales; f__Lachnospiraceae; g__norank_f__Lachnospiraceae; s__uncultured_bacterium_g__norank_f__Lachnospiraceae; OTU84	0.00196876	0.00205435	0	0	0	0	4.27991e-05	0	0	0	0	0	0	0	0	4.27991e-05	0	0	0.588479		0	0
d__Bacteria; k__norank_d__Bacteria; p__Firmicutes; c__Bacilli; o__Erysipelotrichales; f__Erysipelotrichaceae; g__unclassified_f__Erysipelotrichaceae; s__unclassified_f__Erysipelotrichaceae; OTU45	0.00218275	0.000128397	0	0	0	0.00162636	4.27991e-05	0	0	4.27991e-05	0	0	0	0	0	0	0	0	0.121126		4.27991e-05	0
d__Bacteria; k__norank_d__Bacteria; p__Firmicutes; c__Clostridia; o__Clostridia_vadinBB60_group; f__norank_o__Clostridia_vadinBB60_group; g__norank_f__norank_o__Clostridia_vadinBB60_group; s__uncultured_bacterium_g__norank_f__norank_o__Clostridia_vadinBB60_group; OTU411	0	0.000171196	0	8.55981e-05	8.55981e-05	0	0	4.27991e-05	0	0	0	0	0	4.27991e-05	0.000256794	0.000813182	0.00243955	0	0.120706		0	8.55981e-05
d__Bacteria; k__norank_d__Bacteria; p__Firmicutes; c__Clostridia; o__Lachnospirales; f__Lachnospiraceae; g__unclassified_f__Lachnospiraceae; s__unclassified_f__Lachnospiraceae; OTU391	0.000342392	0.000342392	4.27991e-05	0.000427991	0.000427991	0	8.55981e-05	0	4.27991e-05	0	0	4.27991e-05	0	8.55981e-05	0.000984378	0.000513589	0.000427991	0.000128397	0.0592618		0	8.55981e-05
d__Bacteria; k__norank_d__Bacteria; p__Actinobacteriota; c__Actinobacteria; o__Corynebacteriales; f__Nocardiaceae; g__Rhodococcus; s__Rhodococcus_erythropolis; OTU825	0	0	0	0	0	0	0	0	0	8.55981e-05	0.00303873	0	4.27991e-05	0	0	0	0	4.27991e-05	0.290205		0.000727584	0
d__Bacteria; k__norank_d__Bacteria; p__Firmicutes; c__Clostridia; o__Oscillospirales; f__Ruminococcaceae; g__UBA1819; s__uncultured_bacterium_g__UBA1819; OTU7	0.000727584	0.00128397	0	0.00184036	0	0	8.55981e-05	0	0	0	0	0	0	0	0	0	0	0	0.0901637		0	0
d__Bacteria; k__norank_d__Bacteria; p__Bacteroidota; c__Bacteroidia; o__Bacteroidales; f__Rikenellaceae; g__Alistipes; s__Alistipes_finegoldii; OTU115	0.000128397	0.000171196	0.00141237	0	0.000513589	8.55981e-05	0	0	4.27991e-05	0	0	0	8.55981e-05	0.000171196	0.000171196	0.000213995	0.000556388	8.55981e-05	0.00749081		0	0.000299593
d__Bacteria; k__norank_d__Bacteria; p__Firmicutes; c__Clostridia; o__Lachnospirales; f__Lachnospiraceae; g__unclassified_f__Lachnospiraceae; s__unclassified_f__Lachnospiraceae; OTU393	0	0	0.000556388	0	0	0	0	0	0	0	0	0	0	0	0	0	0.00325273	0	0.586071		0	0
d__Bacteria; k__norank_d__Bacteria; p__Proteobacteria; c__Gammaproteobacteria; o__Burkholderiales; f__Oxalobacteraceae; g__Herbaspirillum; s__Herbaspirillum_huttiense; OTU816	0	0	0	0	0	0	0	0	0	4.27991e-05	0.00278194	0	0	0	0	0	0	0	0.120314		0.000941579	0
d__Bacteria; k__norank_d__Bacteria; p__Bacteroidota; c__Bacteroidia; o__Bacteroidales; f__Muribaculaceae; g__norank_f__Muribaculaceae; s__uncultured_bacterium_g__norank_f__Muribaculaceae; OTU621	0	0	0.000513589	0	4.27991e-05	0	4.27991e-05	0.000342392	0.000641986	0	0	0.00089878	0	0.000427991	0.00047079	0.000213995	0.000128397	0	0.396659		4.27991e-05	0
d__Bacteria; k__norank_d__Bacteria; p__Actinobacteriota; c__Coriobacteriia; o__Coriobacteriales; f__Eggerthellaceae; g__Enterorhabdus; s__uncultured_bacterium_g__Enterorhabdus; OTU769	0	4.27991e-05	0	0.000128397	0	4.27991e-05	0.000984378	0.000213995	0.000128397	0.000256794	0	0.000770383	0.000128397	4.27991e-05	0	0.000342392	0	0.000385192	0.0975936		0.000171196	0.000128397
d__Bacteria; k__norank_d__Bacteria; p__Actinobacteriota; c__Coriobacteriia; o__Coriobacteriales; f__Eggerthellaceae; g__unclassified_f__Eggerthellaceae; s__unclassified_f__Eggerthellaceae; OTU767	0	0.000213995	0	0	0	0	0.00119837	0.000556388	0	0.000599187	0	0.00089878	0	0	0	8.55981e-05	0	0	0.0491054		0.000171196	0
d__Bacteria; k__norank_d__Bacteria; p__Bacteroidota; c__Bacteroidia; o__Bacteroidales; f__Rikenellaceae; g__Rikenella; s__uncultured_bacterium_g__Rikenella; OTU270	0	0	0	0	0.000128397	0	4.27991e-05	0	0	0	0	0	0.000171196	0.000171196	0	0	0.000213995	0.00213995	0.0488888		0	0.000855981
d__Bacteria; k__norank_d__Bacteria; p__Firmicutes; c__Clostridia; o__Lachnospirales; f__Lachnospiraceae; g__Roseburia; s__uncultured_bacterium_g__Roseburia; OTU434	0	0.000213995	0.000171196	0.000256794	0	0	0	0.000427991	0	4.27991e-05	0	0	0	0.000385192	0.000299593	0.000299593	0.00154077	0	0.269888		4.27991e-05	0
d__Bacteria; k__norank_d__Bacteria; p__Firmicutes; c__Clostridia; o__Lachnospirales; f__Lachnospiraceae; g__Blautia; s__Lachnospiraceae_bacterium_28-4; OTU407	0.000513589	4.27991e-05	0.000256794	0.000342392	0	0	4.27991e-05	0	0	4.27991e-05	0	0	0	0.00188316	8.55981e-05	4.27991e-05	0.000427991	0	0.206939		0	0
d__Bacteria; k__norank_d__Bacteria; p__Bacteroidota; c__Bacteroidia; o__Bacteroidales; f__Muribaculaceae; g__norank_f__Muribaculaceae; s__uncultured_bacterium_g__norank_f__Muribaculaceae; OTU429	0	0	0.000641986	0	0	0	0.000128397	0.000556388	0.000171196	8.55981e-05	0	0.000171196	0	4.27991e-05	0.000213995	0.000171196	0.00136957	0	0.223785		4.27991e-05	0
d__Bacteria; k__norank_d__Bacteria; p__Firmicutes; c__Clostridia; o__Lachnospirales; f__Lachnospiraceae; g__norank_f__Lachnospiraceae; s__uncultured_bacterium_g__norank_f__Lachnospiraceae; OTU370	4.27991e-05	0.000855981	4.27991e-05	8.55981e-05	8.55981e-05	4.27991e-05	0	0	0	0	0	0	0	0.000342392	0.000513589	0.00115557	0.000427991	0	0.0129509		0	0
d__Bacteria; k__norank_d__Bacteria; p__Cyanobacteria; c__Vampirivibrionia; o__Gastranaerophilales; f__norank_o__Gastranaerophilales; g__norank_f__norank_o__Gastranaerophilales; s__uncultured_bacterium_g__norank_f__norank_o__Gastranaerophilales; OTU523	0	8.55981e-05	4.27991e-05	0	0	0	0.00303873	0	0	0	0	0	0	0.000128397	0	0.000213995	0	4.27991e-05	0.583914		0	0
d__Bacteria; k__norank_d__Bacteria; p__Firmicutes; c__Clostridia; o__Lachnospirales; f__Lachnospiraceae; g__unclassified_f__Lachnospiraceae; s__unclassified_f__Lachnospiraceae; OTU295	0	0.000128397	0.000213995	0.000256794	0.000513589	0	0	4.27991e-05	0	4.27991e-05	0	0	0	0	0.00226835	0	8.55981e-05	0	0.230425		0	0
d__Bacteria; k__norank_d__Bacteria; p__Bacteroidota; c__Bacteroidia; o__Bacteroidales; f__unclassified_o__Bacteroidales; g__unclassified_o__Bacteroidales; s__unclassified_o__Bacteroidales; OTU245	8.55981e-05	0.000213995	0	0	0	0.000171196	0	0	0	0	0	0	0.000641986	0	0	0	0	0.000984378	0.201563		0	0.00141237
d__Bacteria; k__norank_d__Bacteria; p__Firmicutes; c__Clostridia; o__Oscillospirales; f__Oscillospiraceae; g__Oscillibacter; s__uncultured_bacterium_g__Oscillibacter; OTU383	0.000171196	0.000213995	0	0	0.000128397	0.000128397	0	0	0	0	0	0	0.000513589	0.000299593	0.000342392	0.000941579	0.000299593	0.000213995	0.000878975		4.27991e-05	0.000213995
d__Bacteria; k__norank_d__Bacteria; p__Proteobacteria; c__Gammaproteobacteria; o__Burkholderiales; f__Burkholderiaceae; g__Cupriavidus; s__Cupriavidus_metallidurans; OTU810	0	0	0	0	0	0	0	0	0	0	0.00291034	0	0	0	0	0	0	0	0.367879		0.000556388	0
d__Bacteria; k__norank_d__Bacteria; p__Firmicutes; c__Clostridia; o__Lachnospirales; f__Lachnospiraceae; g__norank_f__Lachnospiraceae; s__uncultured_bacterium_g__norank_f__Lachnospiraceae; OTU757	0	0	0	0	0.00089878	0	0	0	4.27991e-05	0	0	0.000427991	0	8.55981e-05	0.00047079	0	0.00154077	0	0.482855		0	0
d__Bacteria; k__norank_d__Bacteria; p__Firmicutes; c__Clostridia; o__Oscillospirales; f__Oscillospiraceae; g__Oscillibacter; s__uncultured_bacterium_g__Oscillibacter; OTU331	0.000171196	0.000385192	0	4.27991e-05	4.27991e-05	4.27991e-05	8.55981e-05	4.27991e-05	0	0	0	0	0.000256794	4.27991e-05	0.000513589	0.000599187	0.000941579	0.000213995	0.0095224		0	8.55981e-05
d__Bacteria; k__norank_d__Bacteria; p__Actinobacteriota; c__Coriobacteriia; o__Coriobacteriales; f__Eggerthellaceae; g__Enterorhabdus; s__uncultured_bacterium_g__Enterorhabdus; OTU774	4.27991e-05	0	0	0.000256794	0	8.55981e-05	0.00106998	0.000256794	0	0.000641986	0	0.000941579	4.27991e-05	0	0	0	0	4.27991e-05	0.14293		4.27991e-05	0
d__Bacteria; k__norank_d__Bacteria; p__Bacteroidota; c__Bacteroidia; o__Bacteroidales; f__Muribaculaceae; g__norank_f__Muribaculaceae; s__unclassified_g__norank_f__Muribaculaceae; OTU311	0	0	0.000128397	0	4.27991e-05	0	0	0	0.000213995	0	0	0	4.27991e-05	0.00132677	0.000171196	0.00132677	0.000171196	0	0.0463239		0	0
d__Bacteria; k__norank_d__Bacteria; p__Bacteroidota; c__Bacteroidia; o__Bacteroidales; f__Muribaculaceae; g__norank_f__Muribaculaceae; s__uncultured_bacterium_g__norank_f__Muribaculaceae; OTU583	0	0	0	0	0	0	0	0.00338113	0	0	0	4.27991e-05	0	0	0	0	0	0	0.120314		0	0
d__Bacteria; k__norank_d__Bacteria; p__Bacteroidota; c__Bacteroidia; o__Bacteroidales; f__Muribaculaceae; g__norank_f__Muribaculaceae; s__uncultured_bacterium_g__norank_f__Muribaculaceae; OTU81	0.000427991	0.000770383	0	0.000342392	0	0.00188316	0	0	0	0	0	0	0	0	0	0	0	0	0.00854298		0	0
d__Bacteria; k__norank_d__Bacteria; p__Bacteroidota; c__Bacteroidia; o__Bacteroidales; f__unclassified_o__Bacteroidales; g__unclassified_o__Bacteroidales; s__unclassified_o__Bacteroidales; OTU490	0	0	0	0	0	8.55981e-05	0	0	0.00128397	0	0	0	4.27991e-05	0.000213995	0	4.27991e-05	0	8.55981e-05	0.220389		0	0.00162636
d__Bacteria; k__norank_d__Bacteria; p__Bacteroidota; c__Bacteroidia; o__Flavobacteriales; f__Flavobacteriaceae; g__norank_f__Flavobacteriaceae; s__gut_metagenome_g__norank_f__Flavobacteriaceae; OTU433	0	0	0.000770383	0	8.55981e-05	0	0	0	8.55981e-05	0	0	0	4.27991e-05	8.55981e-05	0.000556388	0.000513589	0.000941579	0.000128397	0.0152281		0	0.000128397
d__Bacteria; k__norank_d__Bacteria; p__Bacteroidota; c__Bacteroidia; o__Bacteroidales; f__Muribaculaceae; g__norank_f__Muribaculaceae; s__uncultured_bacterium_g__norank_f__Muribaculaceae; OTU286	0	0	0	0	0	0	0	0	0	0	0	0	0	0.00282474	8.55981e-05	0	0.000427991	0	0.0345016		0	0
d__Bacteria; k__norank_d__Bacteria; p__Bacteroidota; c__Bacteroidia; o__Bacteroidales; f__Muribaculaceae; g__norank_f__Muribaculaceae; s__uncultured_bacterium_g__norank_f__Muribaculaceae; OTU597	8.55981e-05	0.000128397	0	0.000128397	0	0.000171196	0	8.55981e-05	0.000727584	0.000128397	0	4.27991e-05	0.000427991	4.27991e-05	0	0	0	0.000342392	0.940903		0	0.000984378
d__Bacteria; k__norank_d__Bacteria; p__Firmicutes; c__Clostridia; o__Oscillospirales; f__Ruminococcaceae; g__unclassified_f__Ruminococcaceae; s__unclassified_f__Ruminococcaceae; OTU195	4.27991e-05	4.27991e-05	4.27991e-05	0.000813182	0.000727584	0	4.27991e-05	8.55981e-05	0	0	0	0	0	0	0.000855981	0.000342392	0.000299593	0	0.276954		0	0
d__Bacteria; k__norank_d__Bacteria; p__Bacteroidota; c__Bacteroidia; o__Bacteroidales; f__Muribaculaceae; g__norank_f__Muribaculaceae; s__unclassified_g__norank_f__Muribaculaceae; OTU57	0.00166916	0.000855981	4.27991e-05	0	0	0.000385192	0	0	0	0	0	0.000213995	0	8.55981e-05	0	0	0	0	0.0828194		0	4.27991e-05
d__Bacteria; k__norank_d__Bacteria; p__Firmicutes; c__Bacilli; o__Lactobacillales; f__Lactobacillaceae; g__Lactobacillus; s__unclassified_g__Lactobacillus; OTU207	0	0	0.000171196	0	0	0.000128397	0.000128397	0.00166916	4.27991e-05	0.000342392	0	0.000770383	0	0	0	0	0	0	0.014843		0	0
d__Bacteria; k__norank_d__Bacteria; p__Bacteroidota; c__Bacteroidia; o__Bacteroidales; f__Muribaculaceae; g__norank_f__Muribaculaceae; s__uncultured_bacterium_g__norank_f__Muribaculaceae; OTU2	0.000385192	0.000128397	4.27991e-05	0	8.55981e-05	4.27991e-05	0	0	0.000128397	0	0	0	0	0.000641986	4.27991e-05	0.000813182	0.000641986	0.000171196	0.0372174		0	0.000128397
d__Bacteria; k__norank_d__Bacteria; p__Firmicutes; c__Clostridia; o__Lachnospirales; f__Lachnospiraceae; g__Acetatifactor; s__uncultured_bacterium_g__Acetatifactor; OTU337	0.000213995	0.00047079	0	0	0	0	0	0	0	0	0	0	0	0.000427991	0.00047079	0.000385192	0.00124117	0	0.0531245		0	0
d__Bacteria; k__norank_d__Bacteria; p__Bacteroidota; c__Bacteroidia; o__Bacteroidales; f__Muribaculaceae; g__norank_f__Muribaculaceae; s__uncultured_bacterium_g__norank_f__Muribaculaceae; OTU486	0.000855981	0.00106998	0	0.000299593	0	8.55981e-05	4.27991e-05	0	0	4.27991e-05	0	4.27991e-05	0.000128397	4.27991e-05	0	0	0	0.000427991	0.294052		0	0.000171196
d__Bacteria; k__norank_d__Bacteria; p__Firmicutes; c__Clostridia; o__Clostridia_UCG-014; f__norank_o__Clostridia_UCG-014; g__norank_f__norank_o__Clostridia_UCG-014; s__unclassified_g__norank_f__norank_o__Clostridia_UCG-014; OTU409	0.000385192	8.55981e-05	0.000256794	8.55981e-05	0.000213995	0.000213995	0.000256794	0.000128397	0	0	0	4.27991e-05	0	0.000342392	0.000813182	0.000213995	0.000171196	0	0.191853		0	0
d__Bacteria; k__norank_d__Bacteria; p__Firmicutes; c__Bacilli; o__Erysipelotrichales; f__Erysipelotrichaceae; g__Ileibacterium; s__Ileibacterium_valens; OTU135	0	0	0.00282474	0	0	0	0.000213995	0.000128397	0	0	0	4.27991e-05	0	0	0	0	0	0	0.163524		0	0
d__Bacteria; k__norank_d__Bacteria; p__Bacteroidota; c__Bacteroidia; o__Bacteroidales; f__Muribaculaceae; g__norank_f__Muribaculaceae; s__uncultured_bacterium_g__norank_f__Muribaculaceae; OTU88	0.00089878	0.00089878	0	0	4.27991e-05	0.000641986	0	0	0.000128397	0	0	0.000213995	4.27991e-05	4.27991e-05	0.000171196	0	4.27991e-05	0	0.366654		0	8.55981e-05
d__Bacteria; k__norank_d__Bacteria; p__Firmicutes; c__Clostridia; o__Lachnospirales; f__Lachnospiraceae; g__A2; s__uncultured_bacterium_g__A2; OTU152	4.27991e-05	4.27991e-05	4.27991e-05	0.000684785	0.00047079	0	0	0	0	0	0	0	0	0	4.27991e-05	0.00132677	0.000256794	0.000256794	0.0241313		0	4.27991e-05
d__Bacteria; k__norank_d__Bacteria; p__Actinobacteriota; c__Coriobacteriia; o__Coriobacteriales; f__Eggerthellaceae; g__Enterorhabdus; s__uncultured_bacterium_g__Enterorhabdus; OTU797	4.27991e-05	8.55981e-05	0	4.27991e-05	4.27991e-05	0.000770383	0.000213995	4.27991e-05	0	0.000213995	0	4.27991e-05	0.000941579	4.27991e-05	4.27991e-05	8.55981e-05	4.27991e-05	0.000171196	0.600922		8.55981e-05	0.000256794
d__Bacteria; k__norank_d__Bacteria; p__Firmicutes; c__Clostridia; o__Clostridia_UCG-014; f__norank_o__Clostridia_UCG-014; g__norank_f__norank_o__Clostridia_UCG-014; s__unclassified_g__norank_f__norank_o__Clostridia_UCG-014; OTU430	0.000342392	0.000128397	0.000128397	0	8.55981e-05	0	0	0	0	0	0	0	0	8.55981e-05	0	0.000599187	0.00179756	0	0.0789153		0	0
d__Bacteria; k__norank_d__Bacteria; p__unclassified_k__norank_d__Bacteria; c__unclassified_k__norank_d__Bacteria; o__unclassified_k__norank_d__Bacteria; f__unclassified_k__norank_d__Bacteria; g__unclassified_k__norank_d__Bacteria; s__unclassified_k__norank_d__Bacteria; OTU350	8.55981e-05	0	0	0	0.000213995	4.27991e-05	0	0	0.000256794	0	0	0	4.27991e-05	0	4.27991e-05	0.00222555	0	0	0.56526		0	0.000256794
d__Bacteria; k__norank_d__Bacteria; p__Bacteroidota; c__Bacteroidia; o__Bacteroidales; f__Muribaculaceae; g__norank_f__Muribaculaceae; s__unclassified_g__norank_f__Muribaculaceae; OTU89	0.00149797	0.000556388	0	0	0	0.000171196	0	8.55981e-05	0	0	0	0	0.000256794	8.55981e-05	0	0	4.27991e-05	0.000256794	0.216215		0	0.000171196
d__Bacteria; k__norank_d__Bacteria; p__Bacteroidota; c__Bacteroidia; o__Bacteroidales; f__Muribaculaceae; g__norank_f__Muribaculaceae; s__uncultured_bacterium_g__norank_f__Muribaculaceae; OTU50	0.00089878	0.00124117	0.000342392	0	4.27991e-05	0.000128397	0	0	0	0	0	0	0	0	0.000128397	0.000128397	0	8.55981e-05	0.0155022		0	8.55981e-05
d__Bacteria; k__norank_d__Bacteria; p__Bacteroidota; c__Bacteroidia; o__Bacteroidales; f__Muribaculaceae; g__norank_f__Muribaculaceae; s__uncultured_bacterium_g__norank_f__Muribaculaceae; OTU213	4.27991e-05	8.55981e-05	4.27991e-05	0	0	0.000427991	4.27991e-05	0.000256794	0.000342392	0.000128397	0	0	0.000427991	8.55981e-05	0	0	0	0.000727584	0.957209		0	0.00047079
d__Bacteria; k__norank_d__Bacteria; p__Firmicutes; c__Clostridia; o__Lachnospirales; f__Lachnospiraceae; g__unclassified_f__Lachnospiraceae; s__unclassified_f__Lachnospiraceae; OTU113	0	0	0.00295314	0	0	0	0	0	0	0	0	8.55981e-05	0	0	0	0	0	0	0.586071		0	0
d__Bacteria; k__norank_d__Bacteria; p__Bacteroidota; c__Bacteroidia; o__Bacteroidales; f__Muribaculaceae; g__norank_f__Muribaculaceae; s__uncultured_bacterium_g__norank_f__Muribaculaceae; OTU309	8.55981e-05	4.27991e-05	0	0.000128397	0	0.000213995	0	0	0.00102718	0	0	8.55981e-05	0	0.000213995	0.000984378	4.27991e-05	0	4.27991e-05	0.704875		0	0.000128397
d__Bacteria; k__norank_d__Bacteria; p__Bacteroidota; c__Bacteroidia; o__Bacteroidales; f__Muribaculaceae; g__norank_f__Muribaculaceae; s__uncultured_bacterium_g__norank_f__Muribaculaceae; OTU126	0	4.27991e-05	0.00196876	0	0	0.000128397	0	0	0.000513589	0	0	8.55981e-05	4.27991e-05	0	4.27991e-05	4.27991e-05	0	4.27991e-05	0.866281		0	8.55981e-05
d__Bacteria; k__norank_d__Bacteria; p__Firmicutes; c__Clostridia; o__Oscillospirales; f__Butyricicoccaceae; g__UCG-009; s__unclassified_g__UCG-009; OTU332	0.00047079	0.000385192	8.55981e-05	0	0.000299593	0	0	0	0	0	0	0	0.000171196	0.000128397	0.000256794	0.000299593	0.00047079	0.000171196	0.0103784		0	0.000213995
d__Bacteria; k__norank_d__Bacteria; p__Bacteroidota; c__Bacteroidia; o__Bacteroidales; f__Marinifilaceae; g__Butyricimonas; s__uncultured_bacterium_g__Butyricimonas; OTU246	0	0	4.27991e-05	0	0.000171196	4.27991e-05	0	0	4.27991e-05	0	0	0	0.000213995	0	0.000171196	0.000171196	0.000256794	0.000213995	0.017114		0	0.00162636
d__Bacteria; k__norank_d__Bacteria; p__Firmicutes; c__Clostridia; o__Clostridia_vadinBB60_group; f__norank_o__Clostridia_vadinBB60_group; g__norank_f__norank_o__Clostridia_vadinBB60_group; s__unclassified_g__norank_f__norank_o__Clostridia_vadinBB60_group; OTU435	0	0	0	4.27991e-05	0.000299593	0	0	0	0	0	0	0	0	0.000128397	0.00047079	0.000171196	0.00184036	0	0.0488007		0	0
d__Bacteria; k__norank_d__Bacteria; p__Bacteroidota; c__Bacteroidia; o__Bacteroidales; f__Muribaculaceae; g__norank_f__Muribaculaceae; s__unclassified_g__norank_f__Muribaculaceae; OTU128	0	0	0.00282474	0	0	0	0	0	0	0	0	0.000128397	0	0	0	0	0	0	0.586071		0	0
d__Bacteria; k__norank_d__Bacteria; p__Firmicutes; c__Clostridia; o__Oscillospirales; f__Ruminococcaceae; g__Harryflintia; s__uncultured_bacterium_g__Harryflintia; OTU394	8.55981e-05	0.000128397	0	0.000171196	0.000128397	0	0	0	8.55981e-05	0	0	0	4.27991e-05	0.000256794	0.000256794	0.000770383	0.000984378	4.27991e-05	0.0136127		0	0
d__Bacteria; k__norank_d__Bacteria; p__Firmicutes; c__Clostridia; o__Lachnospirales; f__Lachnospiraceae; g__Lachnospiraceae_NK4A136_group; s__uncultured_bacterium_g__Lachnospiraceae_NK4A136_group; OTU672	0	0.000342392	8.55981e-05	0.000256794	0.000128397	0.000342392	4.27991e-05	4.27991e-05	0	8.55981e-05	0	8.55981e-05	8.55981e-05	0	0.000385192	0	0.000513589	0.000513589	0.194144		0	0
d__Bacteria; k__norank_d__Bacteria; p__Bacteroidota; c__Bacteroidia; o__Bacteroidales; f__unclassified_o__Bacteroidales; g__unclassified_o__Bacteroidales; s__unclassified_o__Bacteroidales; OTU235	0.000727584	0.000299593	0	0	0	0.000684785	0	0	0	0	0	0	0.000299593	0	0	0	0	0.000342392	0.146469		0	0.000513589
d__Bacteria; k__norank_d__Bacteria; p__Bacteroidota; c__Bacteroidia; o__Bacteroidales; f__Muribaculaceae; g__norank_f__Muribaculaceae; s__uncultured_bacterium_g__norank_f__Muribaculaceae; OTU436	0	0	8.55981e-05	0	0.000171196	0	0	0.000171196	4.27991e-05	0	0	0.000128397	0	0.000385192	0.00115557	8.55981e-05	0.000599187	0	0.279104		0	0
d__Bacteria; k__norank_d__Bacteria; p__Firmicutes; c__Clostridia; o__Lachnospirales; f__Lachnospiraceae; g__Lachnospiraceae_NK4A136_group; s__uncultured_bacterium_g__Lachnospiraceae_NK4A136_group; OTU107	0	0	0.00273914	0	0	0	0	0	0	0	0	0	0	8.55981e-05	0	0	0	0	0.586071		0	0
d__Bacteria; k__norank_d__Bacteria; p__Bacteroidota; c__Bacteroidia; o__Bacteroidales; f__Muribaculaceae; g__norank_f__Muribaculaceae; s__uncultured_bacterium_g__norank_f__Muribaculaceae; OTU603	0	0	0	0	0	0	4.27991e-05	0.00119837	0	0.000770383	0	0.000727584	0	0	0	0	4.27991e-05	0	0.0248693		0	0
d__Bacteria; k__norank_d__Bacteria; p__Bacteroidota; c__Bacteroidia; o__Bacteroidales; f__Muribaculaceae; g__norank_f__Muribaculaceae; s__unclassified_g__norank_f__Muribaculaceae; OTU62	4.27991e-05	0.000727584	0	0.00132677	0	0.000171196	0	0	0	0	0	0	4.27991e-05	0	0	0	0	0	0.0248693		0	0.000427991
d__Bacteria; k__norank_d__Bacteria; p__Cyanobacteria; c__Cyanobacteriia; o__Chloroplast; f__norank_o__Chloroplast; g__norank_f__norank_o__Chloroplast; s__unclassified_g__norank_f__norank_o__Chloroplast; OTU725	0	0	0	0	0	0	0.000427991	4.27991e-05	0	0.000299593	0.00166916	0	0	0	0	0	0	0	0.00854298		0.000299593	0
d__Bacteria; k__norank_d__Bacteria; p__Bacteroidota; c__Bacteroidia; o__Bacteroidales; f__Muribaculaceae; g__norank_f__Muribaculaceae; s__uncultured_bacterium_g__norank_f__Muribaculaceae; OTU748	0	0	0.000855981	0	0	0	0.000641986	4.27991e-05	0.000171196	4.27991e-05	0	0.000256794	0	0.000256794	4.27991e-05	4.27991e-05	0.000299593	0	0.22989		4.27991e-05	0
d__Bacteria; k__norank_d__Bacteria; p__Bacteroidota; c__Bacteroidia; o__Bacteroidales; f__Muribaculaceae; g__norank_f__Muribaculaceae; s__uncultured_bacterium_g__norank_f__Muribaculaceae; OTU287	4.27991e-05	0	0	0	0	0	0	0	0	4.27991e-05	0	0	0	0.00196876	4.27991e-05	8.55981e-05	0.00047079	0	0.0632722		0	0
d__Bacteria; k__norank_d__Bacteria; p__Bacteroidota; c__Bacteroidia; o__Bacteroidales; f__Muribaculaceae; g__norank_f__Muribaculaceae; s__uncultured_bacterium_g__norank_f__Muribaculaceae; OTU578	0	0	0	0	0	0	0	0.00265354	0	0	0	0	0	0	0	0	0	0	0.367879		0	0
d__Bacteria; k__norank_d__Bacteria; p__Firmicutes; c__Clostridia; o__Lachnospirales; f__Lachnospiraceae; g__norank_f__Lachnospiraceae; s__uncultured_bacterium_g__norank_f__Lachnospiraceae; OTU404	0	0.00047079	0	0.000213995	0.000128397	8.55981e-05	8.55981e-05	0	0	0	0	0	8.55981e-05	0	0	0.000599187	0.000941579	0	0.189605		0	4.27991e-05
d__Bacteria; k__norank_d__Bacteria; p__Firmicutes; c__Clostridia; o__Lachnospirales; f__Lachnospiraceae; g__Roseburia; s__uncultured_bacterium_g__Roseburia; OTU388	4.27991e-05	0.00106998	0	0.000171196	0.000641986	0	0	0	0	0	0	0	0	0.000213995	0.000171196	0	0.000342392	0	0.0675373		0	0
d__Bacteria; k__norank_d__Bacteria; p__Firmicutes; c__Clostridia; o__Lachnospirales; f__Lachnospiraceae; g__norank_f__Lachnospiraceae; s__uncultured_bacterium_g__norank_f__Lachnospiraceae; OTU342	0.000213995	0.000213995	4.27991e-05	0.000855981	8.55981e-05	0.000213995	0	0	0	4.27991e-05	0	0	0.000256794	0	4.27991e-05	0.000299593	0.000213995	0	0.0172335		0	0.000128397
d__Bacteria; k__norank_d__Bacteria; p__Bacteroidota; c__Bacteroidia; o__Bacteroidales; f__Muribaculaceae; g__norank_f__Muribaculaceae; s__unclassified_g__norank_f__Muribaculaceae; OTU125	0	4.27991e-05	0.00162636	0	0	0	8.55981e-05	0	0.000556388	0	0	0.000256794	0	0	0	0	0	0	0.170291		0	0
d__Bacteria; k__norank_d__Bacteria; p__Firmicutes; c__Clostridia; o__Lachnospirales; f__Lachnospiraceae; g__unclassified_f__Lachnospiraceae; s__unclassified_f__Lachnospiraceae; OTU416	0	0	0	4.27991e-05	8.55981e-05	8.55981e-05	0	0	0	0	0	0	0	0.000171196	4.27991e-05	0.000684785	0.00141237	0	0.05006		0	4.27991e-05
d__Bacteria; k__norank_d__Bacteria; p__Bacteroidota; c__Bacteroidia; o__Bacteroidales; f__Muribaculaceae; g__norank_f__Muribaculaceae; s__uncultured_Bacteroidales_bacterium_g__norank_f__Muribaculaceae; OTU632	0	0	0	0	0	0	0	0	0.000385192	0	0	0	0	0.000641986	0	0.00149797	0	0	0.283428		0	0
d__Bacteria; k__norank_d__Bacteria; p__Bacteroidota; c__Bacteroidia; o__Bacteroidales; f__Tannerellaceae; g__Parabacteroides; s__Parabacteroides_sp.; OTU459	0	0	0	0	0	0	0	0	0	0	0	0	0.000299593	0	0	0	0	0.00154077	0.120314		0	0.000684785
d__Bacteria; k__norank_d__Bacteria; p__Bacteroidota; c__Bacteroidia; o__Bacteroidales; f__Muribaculaceae; g__norank_f__Muribaculaceae; s__uncultured_bacterium_g__norank_f__Muribaculaceae; OTU747	0.000299593	8.55981e-05	0	0.000171196	0.000427991	0.000385192	0	0	0.000299593	0	0	4.27991e-05	0	0.000256794	0.000213995	0	0.000256794	0	0.149871		0	8.55981e-05
d__Bacteria; k__norank_d__Bacteria; p__Firmicutes; c__unclassified_p__Firmicutes; o__unclassified_p__Firmicutes; f__unclassified_p__Firmicutes; g__unclassified_p__Firmicutes; s__unclassified_p__Firmicutes; OTU258	0	0.000128397	0	0	0	0	0	0	4.27991e-05	4.27991e-05	0	0	0	0.00196876	8.55981e-05	8.55981e-05	0.000128397	0	0.140621		0	0
d__Bacteria; k__norank_d__Bacteria; p__Firmicutes; c__Bacilli; o__Lactobacillales; f__Lactobacillaceae; g__Lactobacillus; s__unclassified_g__Lactobacillus; OTU770	4.27991e-05	0	0	0	0	0.000171196	0.000342392	0.00089878	0	4.27991e-05	0	0.000941579	0	0	0	0	0	0	0.0442494		0	0
d__Bacteria; k__norank_d__Bacteria; p__Firmicutes; c__Clostridia; o__Lachnospirales; f__Lachnospiraceae; g__Blautia; s__unclassified_g__Blautia; OTU171	0	0.000213995	0.000128397	0	8.55981e-05	0.000256794	4.27991e-05	0	0	4.27991e-05	0	0	0	4.27991e-05	0.000427991	0.00047079	0.000727584	0	0.16198		0	0
d__Bacteria; k__norank_d__Bacteria; p__Firmicutes; c__Clostridia; o__Lachnospirales; f__Lachnospiraceae; g__unclassified_f__Lachnospiraceae; s__unclassified_f__Lachnospiraceae; OTU468	0.000128397	4.27991e-05	0	0	0	4.27991e-05	0	0	0	0	0	0	0.000128397	0.000171196	0.000128397	0	8.55981e-05	0.000941579	0.0105149		0	0.000770383
d__Bacteria; k__norank_d__Bacteria; p__Firmicutes; c__Clostridia; o__Oscillospirales; f__Ruminococcaceae; g__Ruminococcus; s__unclassified_g__Ruminococcus; OTU243	0	0	0.000427991	0	0	0	0	0	0	0	0	0	0.000385192	0	4.27991e-05	0.000342392	0.000299593	0	0.0596487		0	0.000855981
d__Bacteria; k__norank_d__Bacteria; p__Bacteroidota; c__Bacteroidia; o__Bacteroidales; f__Muribaculaceae; g__norank_f__Muribaculaceae; s__uncultured_bacterium_g__norank_f__Muribaculaceae; OTU642	0	0	0	0.000171196	0	8.55981e-05	0	0.000128397	0.00089878	0.000128397	0	0.000128397	4.27991e-05	4.27991e-05	0	0	0	0.000256794	0.409438		0	0.00047079
d__Bacteria; k__norank_d__Bacteria; p__Proteobacteria; c__Alphaproteobacteria; o__Rhodospirillales; f__norank_o__Rhodospirillales; g__norank_f__norank_o__Rhodospirillales; s__unclassified_g__norank_f__norank_o__Rhodospirillales; OTU275	0	0	0.000171196	0	0	0	0	0	8.55981e-05	0	0	0	0	0.000770383	0	0.00119837	0.000128397	0	0.250017		0	0
d__Bacteria; k__norank_d__Bacteria; p__Bacteroidota; c__Bacteroidia; o__Bacteroidales; f__Rikenellaceae; g__Rikenellaceae_RC9_gut_group; s__uncultured_bacterium_g__Rikenellaceae_RC9_gut_group; OTU308	0	0	4.27991e-05	0	0	0	0	0	4.27991e-05	0	0	0	0.000171196	0	0.000513589	0	0	0.000599187	0.205318		0	0.000941579
d__Bacteria; k__norank_d__Bacteria; p__Firmicutes; c__Bacilli; o__Mycoplasmatales; f__Mycoplasmataceae; g__Ureaplasma; s__uncultured_bacterium_g__Ureaplasma; OTU544	0	0	0	0	4.27991e-05	0	4.27991e-05	0	0	0	4.27991e-05	0	0	0.000599187	0.00089878	0.000427991	0.000256794	0	0.0736119		0	0
d__Bacteria; k__norank_d__Bacteria; p__Firmicutes; c__Clostridia; o__unclassified_c__Clostridia; f__unclassified_c__Clostridia; g__unclassified_c__Clostridia; s__unclassified_c__Clostridia; OTU347	0	0	0	0	8.55981e-05	0	0	0	0	0	0	0	0	0	0.000171196	0.000342392	0.00166916	0	0.0901637		0	0
d__Bacteria; k__norank_d__Bacteria; p__Bacteroidota; c__Bacteroidia; o__Bacteroidales; f__Muribaculaceae; g__norank_f__Muribaculaceae; s__uncultured_bacterium_g__norank_f__Muribaculaceae; OTU610	0	0	0	0	0	0	0	0.00226835	0	0	0	0	0	0	0	0	0	0	0.367879		0	0
d__Bacteria; k__norank_d__Bacteria; p__Firmicutes; c__Bacilli; o__Lactobacillales; f__Streptococcaceae; g__Streptococcus; s__Streptococcus_respiraculi; OTU815	0	0	0	0	0.000171196	0	4.27991e-05	4.27991e-05	0	4.27991e-05	0	0	0	8.55981e-05	0.000385192	0.000128397	0.000256794	0	0.154945		0.00111278	0
d__Bacteria; k__norank_d__Bacteria; p__Firmicutes; c__Clostridia; o__Lachnospirales; f__Defluviitaleaceae; g__Defluviitaleaceae_UCG-011; s__uncultured_organism_g__Defluviitaleaceae_UCG-011; OTU47	0.00166916	4.27991e-05	8.55981e-05	0	0	0.000213995	4.27991e-05	0	0	0	0	0	0.000213995	0	0	0	0	0	0.103141		0	0
d__Bacteria; k__norank_d__Bacteria; p__Firmicutes; c__Clostridia; o__Lachnospirales; f__Lachnospiraceae; g__GCA-900066575; s__uncultured_bacterium_g__GCA-900066575; OTU420	0.000256794	0.000256794	4.27991e-05	4.27991e-05	0.000171196	8.55981e-05	0	0	0	0	0	0	0	0.000213995	0.000385192	4.27991e-05	0.00047079	0.000256794	0.00578074		0	0
d__Bacteria; k__norank_d__Bacteria; p__Bacteroidota; c__Bacteroidia; o__Bacteroidales; f__Prevotellaceae; g__Alloprevotella; s__uncultured_Bacteroidales_bacterium_g__Alloprevotella; OTU501	4.27991e-05	4.27991e-05	0	0	0	8.55981e-05	0	0	8.55981e-05	0	0	0	8.55981e-05	4.27991e-05	4.27991e-05	0	0	4.27991e-05	0.38538		0	0.00175476
d__Bacteria; k__norank_d__Bacteria; p__Firmicutes; c__Clostridia; o__Lachnospirales; f__Lachnospiraceae; g__Tyzzerella; s__unclassified_g__Tyzzerella; OTU307	4.27991e-05	0.00047079	4.27991e-05	0	0	0	0	0	0	0	0	0	0	0	0.00158357	0	0	0	0.162947		0	0
d__Bacteria; k__norank_d__Bacteria; p__Bacteroidota; c__Bacteroidia; o__Bacteroidales; f__Prevotellaceae; g__Prevotellaceae_UCG-001; s__uncultured_bacterium_g__Prevotellaceae_UCG-001; OTU520	8.55981e-05	4.27991e-05	0	0	0	4.27991e-05	0	0	0	0	0	0	0.000171196	0	0	0	0	0.000256794	0.201029		0	0.00149797
d__Bacteria; k__norank_d__Bacteria; p__Bacteroidota; c__Bacteroidia; o__Bacteroidales; f__Muribaculaceae; g__norank_f__Muribaculaceae; s__uncultured_bacterium_g__norank_f__Muribaculaceae; OTU639	4.27991e-05	4.27991e-05	8.55981e-05	4.27991e-05	0	0.000385192	0	0	0.000599187	0	0	4.27991e-05	0	0	0	0	4.27991e-05	0.000256794	0.267333		0	0.000556388
d__Bacteria; k__norank_d__Bacteria; p__Firmicutes; c__Clostridia; o__Oscillospirales; f__Ruminococcaceae; g__unclassified_f__Ruminococcaceae; s__unclassified_f__Ruminococcaceae; OTU741	0	0.000213995	0	4.27991e-05	0.000813182	0	0	8.55981e-05	0	0	8.55981e-05	0	0	4.27991e-05	0.000171196	0.000171196	0.00047079	0	0.446884		0	0
d__Bacteria; k__norank_d__Bacteria; p__Bacteroidota; c__Bacteroidia; o__Bacteroidales; f__Bacteroidaceae; g__Bacteroides; s__unclassified_g__Bacteroides; OTU706	0	0	0.00047079	0	0.000128397	0	0	0	8.55981e-05	0	0.000941579	0	0	4.27991e-05	0	0.000171196	0.000213995	0	0.913212		0	4.27991e-05
d__Bacteria; k__norank_d__Bacteria; p__Firmicutes; c__Bacilli; o__Lactobacillales; f__Lactobacillaceae; g__Lactobacillus; s__unclassified_g__Lactobacillus; OTU315	0	0	0	0	0	0	0	0	0	0	0	0	0	0	0.00205435	0	0	0	0.367879		0	0
d__Bacteria; k__norank_d__Bacteria; p__Bacteroidota; c__Bacteroidia; o__Bacteroidales; f__Muribaculaceae; g__norank_f__Muribaculaceae; s__uncultured_bacterium_g__norank_f__Muribaculaceae; OTU122	0	0	0.00175476	0	0	0	8.55981e-05	4.27991e-05	8.55981e-05	0	0	8.55981e-05	0	0	0	0	0	0	0.0585398		0	0
d__Bacteria; k__norank_d__Bacteria; p__Firmicutes; c__Bacilli; o__Erysipelotrichales; f__Erysipelotrichaceae; g__unclassified_f__Erysipelotrichaceae; s__unclassified_f__Erysipelotrichaceae; OTU3	0.00179756	0	0	0	0	0.000213995	0	0	0	0	0	0	0	0	0	0	0	0	0.120314		0	0
d__Bacteria; k__norank_d__Bacteria; p__Bacteroidota; c__Bacteroidia; o__Bacteroidales; f__Tannerellaceae; g__Parabacteroides; s__Parabacteroides_goldsteinii; OTU730	0.000171196	0.000128397	8.55981e-05	0	0	0.000342392	0	0	0	0	4.27991e-05	0	0.000299593	0	4.27991e-05	0	4.27991e-05	0.000556388	0.107192		0	0.000299593
d__Bacteria; k__norank_d__Bacteria; p__Firmicutes; c__Clostridia; o__Lachnospirales; f__Lachnospiraceae; g__unclassified_f__Lachnospiraceae; s__unclassified_f__Lachnospiraceae; OTU656	0	4.27991e-05	0	8.55981e-05	0	0	0	4.27991e-05	0	0.00106998	0	0	0	0.000299593	4.27991e-05	4.27991e-05	0.000128397	0	0.455282		0	0.000213995
d__Bacteria; k__norank_d__Bacteria; p__Firmicutes; c__Clostridia; o__Clostridia_UCG-014; f__norank_o__Clostridia_UCG-014; g__norank_f__norank_o__Clostridia_UCG-014; s__unclassified_g__norank_f__norank_o__Clostridia_UCG-014; OTU27	0.00124117	0	0	0	0	0	0	0	0	0	0	0	0	0	0.000727584	0	0	0	0.586071		0	0
d__Bacteria; k__norank_d__Bacteria; p__Firmicutes; c__Clostridia; o__Lachnospirales; f__Lachnospiraceae; g__norank_f__Lachnospiraceae; s__uncultured_bacterium_g__norank_f__Lachnospiraceae; OTU408	0	0	0	0	0	0	0.000213995	0	0	0	0	4.27991e-05	0	0.000727584	0	0.000427991	0.000556388	0	0.121549		0	0
d__Bacteria; k__norank_d__Bacteria; p__Bacteroidota; c__Bacteroidia; o__Bacteroidales; f__Muribaculaceae; g__norank_f__Muribaculaceae; s__uncultured_bacterium_g__norank_f__Muribaculaceae; OTU633	0	0	0	0	0	0	0	0	0.000727584	0	0	4.27991e-05	0	0.000342392	8.55981e-05	0.000770383	0	0	0.155065		0	0
d__Bacteria; k__norank_d__Bacteria; p__Firmicutes; c__Clostridia; o__Lachnospirales; f__Lachnospiraceae; g__Ruminococcus_torques_group; s__uncultured_bacterium_g__Ruminococcus_torques_group; OTU673	0	0	0	0	0	0	0	4.27991e-05	0	0.00184036	4.27991e-05	4.27991e-05	0	0	0	0	0	0	0.00822975		0	0
d__Bacteria; k__norank_d__Bacteria; p__Firmicutes; c__Bacilli; o__Erysipelotrichales; f__Erysipelatoclostridiaceae; g__Candidatus_Stoquefichus; s__uncultured_bacterium_g__Candidatus_Stoquefichus; OTU463	0	0	0	0	0	0	0	0	0	0	0	0	0.000256794	8.55981e-05	0	0	0	0.00089878	0.0345016		0	0.000727584
d__Bacteria; k__norank_d__Bacteria; p__Firmicutes; c__Clostridia; o__Oscillospirales; f__Oscillospiraceae; g__UCG-005; s__uncultured_bacterium_g__UCG-005; OTU236	0.000427991	4.27991e-05	0.000128397	0	0	8.55981e-05	0	0	0	8.55981e-05	0	0	0.000941579	0	0	0	0	0.000128397	0.263627		0	8.55981e-05
d__Bacteria; k__norank_d__Bacteria; p__Firmicutes; c__Clostridia; o__Peptostreptococcales-Tissierellales; f__Anaerovoracaceae; g__Eubacterium_brachy_group; s__uncultured_bacterium_g__Eubacterium_brachy_group; OTU509	0.000213995	4.27991e-05	4.27991e-05	8.55981e-05	4.27991e-05	0.000128397	0	0	0	0	0	4.27991e-05	0.000128397	0.000171196	0.000299593	8.55981e-05	4.27991e-05	0.000385192	0.00304262		0	0.000213995
d__Bacteria; k__norank_d__Bacteria; p__Firmicutes; c__Clostridia; o__Clostridia_vadinBB60_group; f__norank_o__Clostridia_vadinBB60_group; g__norank_f__norank_o__Clostridia_vadinBB60_group; s__unclassified_g__norank_f__norank_o__Clostridia_vadinBB60_group; OTU351	0	4.27991e-05	0	0	0.000128397	0	8.55981e-05	0	0	0	0	0	0	0	0.000427991	0.000385192	0.000813182	0	0.286295		0	4.27991e-05
d__Bacteria; k__norank_d__Bacteria; p__Firmicutes; c__Clostridia; o__Lachnospirales; f__Lachnospiraceae; g__unclassified_f__Lachnospiraceae; s__unclassified_f__Lachnospiraceae; OTU304	8.55981e-05	0.000128397	0	8.55981e-05	4.27991e-05	4.27991e-05	8.55981e-05	0	0	0	0	0	4.27991e-05	0	0.00047079	0.000299593	0.000256794	0.000299593	0.0300751		0	8.55981e-05
d__Bacteria; k__norank_d__Bacteria; p__Firmicutes; c__Clostridia; o__Clostridia_vadinBB60_group; f__norank_o__Clostridia_vadinBB60_group; g__norank_f__norank_o__Clostridia_vadinBB60_group; s__uncultured_bacterium_g__norank_f__norank_o__Clostridia_vadinBB60_group; OTU354	0	0	0.000385192	0	0	0	0	0	0	0	0	0	0	0	0.000770383	0.000299593	0.000427991	0	0.112406		0	0
d__Bacteria; k__norank_d__Bacteria; p__Bacteroidota; c__Bacteroidia; o__Bacteroidales; f__Prevotellaceae; g__Prevotellaceae_UCG-001; s__unclassified_g__Prevotellaceae_UCG-001; OTU613	0	0	0	0	0	0	0	0	0.000556388	0	0	0	0	0.000256794	0.00089878	0.000171196	0	0	0.13708		0	0
d__Bacteria; k__norank_d__Bacteria; p__Bacteroidota; c__Bacteroidia; o__Bacteroidales; f__Muribaculaceae; g__norank_f__Muribaculaceae; s__uncultured_bacterium_g__norank_f__Muribaculaceae; OTU138	4.27991e-05	0.000128397	0.00154077	0	0	8.55981e-05	0	0	0	0	0	0	0	0	4.27991e-05	0	0	0	0.0248693		0	0
d__Bacteria; k__norank_d__Bacteria; p__Firmicutes; c__Clostridia; o__Clostridia_vadinBB60_group; f__norank_o__Clostridia_vadinBB60_group; g__norank_f__norank_o__Clostridia_vadinBB60_group; s__unclassified_g__norank_f__norank_o__Clostridia_vadinBB60_group; OTU349	0	4.27991e-05	4.27991e-05	0	4.27991e-05	0	0	4.27991e-05	0	0	0	0	0	0	0.000128397	0.000599187	0.000941579	0	0.283804		0	0
d__Bacteria; k__norank_d__Bacteria; p__Actinobacteriota; c__Coriobacteriia; o__Coriobacteriales; f__Eggerthellaceae; g__Enterorhabdus; s__uncultured_bacterium_g__Enterorhabdus; OTU536	0	0	0	0.000342392	0	0	0.000342392	0	8.55981e-05	0.000342392	0	4.27991e-05	0.000128397	0	4.27991e-05	0.000256794	0	0.000128397	0.313101		8.55981e-05	4.27991e-05
d__Bacteria; k__norank_d__Bacteria; p__Firmicutes; c__Bacilli; o__Lactobacillales; f__Carnobacteriaceae; g__Jeotgalibaca; s__unclassified_g__Jeotgalibaca; OTU808	0	0	0	0	0	0	0	0	0	0	0.000599187	0	0	0	0	0	0	0	0.367879		0.00124117	0
d__Bacteria; k__norank_d__Bacteria; p__Proteobacteria; c__Alphaproteobacteria; o__Caulobacterales; f__Caulobacteraceae; g__Brevundimonas; s__Brevundimonas_diminuta; OTU800	0	0	0	0	0	0	0	0	0	0	0.000213995	0	0	0	0	0	0	0	0.367879		0.00162636	0
d__Bacteria; k__norank_d__Bacteria; p__Firmicutes; c__Clostridia; o__Oscillospirales; f__Oscillospiraceae; g__Colidextribacter; s__uncultured_bacterium_g__Colidextribacter; OTU250	8.55981e-05	4.27991e-05	4.27991e-05	4.27991e-05	0.000128397	0	0	8.55981e-05	0	0	0	0	0	0.000128397	0	0.000770383	0.00047079	0	0.177419		0	0
d__Bacteria; k__norank_d__Bacteria; p__Firmicutes; c__Bacilli; o__Lactobacillales; f__Aerococcaceae; g__Aerococcus; s__Aerococcus_urinaeequi; OTU802	0	0	0	0	0	0	0	0	0	4.27991e-05	0.000427991	0.00115557	0	0	0	0	0	0	0.0345016		0.000171196	0
d__Bacteria; k__norank_d__Bacteria; p__Bacteroidota; c__Bacteroidia; o__Bacteroidales; f__Muribaculaceae; g__norank_f__Muribaculaceae; s__uncultured_bacterium_g__norank_f__Muribaculaceae; OTU515	0	0	0	0	0	0	0	0	0	0.000171196	0	0	0.000427991	0	0	0	0	0.000599187	0.283428		0	0.000599187
d__Bacteria; k__norank_d__Bacteria; p__Bacteroidota; c__Bacteroidia; o__Bacteroidales; f__Muribaculaceae; g__norank_f__Muribaculaceae; s__uncultured_bacterium_g__norank_f__Muribaculaceae; OTU136	0	0	0.00154077	0	0	0	0	8.55981e-05	8.55981e-05	0	0	4.27991e-05	0	0	0	0	0	0	0.162947		0	0
d__Bacteria; k__norank_d__Bacteria; p__Firmicutes; c__Bacilli; o__Staphylococcales; f__Gemellaceae; g__Gemella; s__uncultured_bacterium_g__Gemella; OTU537	0	0	0	0	0	0	0.00089878	0	0	4.27991e-05	0	0.000813182	0	0	0	0	0	0	0.0345016		0	0
d__Bacteria; k__norank_d__Bacteria; p__Proteobacteria; c__Gammaproteobacteria; o__Xanthomonadales; f__Xanthomonadaceae; g__Stenotrophomonas; s__Pseudomonas_geniculata_g__Stenotrophomonas; OTU798	0	0	0	0	0	0	0	0	0	0	0.00132677	0	0	0	0	0	0	0	0.367879		0.000427991	0
d__Bacteria; k__norank_d__Bacteria; p__Bacteroidota; c__Bacteroidia; o__Bacteroidales; f__Muribaculaceae; g__norank_f__Muribaculaceae; s__uncultured_bacterium_g__norank_f__Muribaculaceae; OTU439	0	0	0	0	0.000171196	0	0	0	0	0	0	0	0	0.000128397	0.000727584	8.55981e-05	0.000641986	0	0.0373432		0	0
d__Bacteria; k__norank_d__Bacteria; p__Firmicutes; c__Bacilli; o__Lactobacillales; f__Lactobacillaceae; g__Lactobacillus; s__unclassified_g__Lactobacillus; OTU310	0	0	0	0	0	0	0	0	0.00124117	0	0	0	0	0.000213995	0.000128397	0.000171196	0	0	0.163524		0	0
d__Bacteria; k__norank_d__Bacteria; p__Firmicutes; c__Clostridia; o__Lachnospirales; f__Lachnospiraceae; g__Lachnospiraceae_NK4A136_group; s__unclassified_g__Lachnospiraceae_NK4A136_group; OTU419	0	0	0	0	0	0	0	0	0	0	0	0	0	0.000342392	0	0	0.00136957	0	0.120314		0	0
d__Bacteria; k__norank_d__Bacteria; p__Firmicutes; c__Clostridia; o__Oscillospirales; f__Oscillospiraceae; g__Oscillibacter; s__Clostridiales_bacterium_CIEAF_021; OTU344	0.000213995	0	0	0.000128397	0	0	0	0	0	0	0	0	0	0.000128397	0	0.000684785	0.00047079	0	0.146469		0	8.55981e-05
d__Bacteria; k__norank_d__Bacteria; p__Firmicutes; c__Clostridia; o__Lachnospirales; f__Lachnospiraceae; g__Roseburia; s__uncultured_bacterium_g__Roseburia; OTU268	0	0	0	0	0	0	0	0	0	0	0	0	0	0.00162636	0	0	8.55981e-05	0	0.120314		0	0
d__Bacteria; k__norank_d__Bacteria; p__Firmicutes; c__Clostridia; o__Lachnospirales; f__Lachnospiraceae; g__unclassified_f__Lachnospiraceae; s__unclassified_f__Lachnospiraceae; OTU160	0	8.55981e-05	0	0.00162636	0	0	0	0	0	0	0	0	0	0	0	0	0	0	0.120314		0	0
d__Bacteria; k__norank_d__Bacteria; p__Firmicutes; c__Clostridia; o__Clostridia_vadinBB60_group; f__norank_o__Clostridia_vadinBB60_group; g__norank_f__norank_o__Clostridia_vadinBB60_group; s__uncultured_bacterium_g__norank_f__norank_o__Clostridia_vadinBB60_group; OTU363	0	0.000213995	0	4.27991e-05	4.27991e-05	0	0	0	4.27991e-05	0	0	0	0	0	0.000556388	0.000299593	0.000385192	0	0.270285		8.55981e-05	4.27991e-05
d__Bacteria; k__norank_d__Bacteria; p__Actinobacteriota; c__Coriobacteriia; o__Coriobacteriales; f__Eggerthellaceae; g__Parvibacter; s__unclassified_g__Parvibacter; OTU834	4.27991e-05	4.27991e-05	0	0	0	0	0	4.27991e-05	0	4.27991e-05	4.27991e-05	0	4.27991e-05	4.27991e-05	0	0	0	0.000171196	0.734392		0.00102718	0.000171196
d__Bacteria; k__norank_d__Bacteria; p__Firmicutes; c__Clostridia; o__unclassified_c__Clostridia; f__unclassified_c__Clostridia; g__unclassified_c__Clostridia; s__unclassified_c__Clostridia; OTU492	0.000299593	8.55981e-05	0	0	0	4.27991e-05	0	0	0	0	0	0	0	0	0	0	0	0.00119837	0.163524		0	0
d__Bacteria; k__norank_d__Bacteria; p__Firmicutes; c__Clostridia; o__Christensenellales; f__Christensenellaceae; g__Christensenellaceae_R-7_group; s__unclassified_g__Christensenellaceae_R-7_group; OTU339	0.000213995	0	8.55981e-05	0	0	0	0	0	8.55981e-05	4.27991e-05	0	4.27991e-05	0	0.00102718	0	4.27991e-05	4.27991e-05	4.27991e-05	0.772322		0	0
d__Bacteria; k__norank_d__Bacteria; p__Desulfobacterota; c__Desulfovibrionia; o__Desulfovibrionales; f__Desulfovibrionaceae; g__norank_f__Desulfovibrionaceae; s__uncultured_Desulfovibrionales_bacterium_g__norank_f__Desulfovibrionaceae; OTU191	0	0	4.27991e-05	0	8.55981e-05	0	8.55981e-05	0	0	0	0	0	0	0.000128397	0.00047079	0.000385192	0.000427991	0	0.0762404		0	0
d__Bacteria; k__norank_d__Bacteria; p__Bacteroidota; c__Bacteroidia; o__Bacteroidales; f__Muribaculaceae; g__norank_f__Muribaculaceae; s__uncultured_bacterium_g__norank_f__Muribaculaceae; OTU606	0	0	0	0	0	0	4.27991e-05	0.00141237	0	4.27991e-05	0	0.000128397	0	0	0	0	0	0	0.00846403		0	0
d__Bacteria; k__norank_d__Bacteria; p__Firmicutes; c__Bacilli; o__Erysipelotrichales; f__Erysipelotrichaceae; g__Clostridium_innocuum_group; s__uncultured_bacterium_g__Clostridium_innocuum_group; OTU721	0	0	0	0	0	0	0	0	0	0	0.00128397	0	0	0	0	0	0	8.55981e-05	0.586071		0	0.000171196
d__Bacteria; k__norank_d__Bacteria; p__Bacteroidota; c__Bacteroidia; o__Bacteroidales; f__Muribaculaceae; g__norank_f__Muribaculaceae; s__uncultured_bacterium_g__norank_f__Muribaculaceae; OTU139	0	0	0.000984378	0	0	0	4.27991e-05	0.000256794	0.000128397	0	0	4.27991e-05	0	0	0	0	4.27991e-05	4.27991e-05	0.269488		0	0
d__Bacteria; k__norank_d__Bacteria; p__Firmicutes; c__Bacilli; o__Lactobacillales; f__Lactobacillaceae; g__Lactobacillus; s__unclassified_g__Lactobacillus; OTU260	0	0	4.27991e-05	0	8.55981e-05	0	0	0	0.000770383	0	0	0	0	0.000299593	0	0.000171196	4.27991e-05	0	0.583914		8.55981e-05	4.27991e-05
d__Bacteria; k__norank_d__Bacteria; p__Firmicutes; c__Clostridia; o__Oscillospirales; f__Ruminococcaceae; g__Harryflintia; s__uncultured_bacterium_g__Harryflintia; OTU24	8.55981e-05	0.000213995	0	0.000342392	0	0	4.27991e-05	0	0	0	0	0	0	0.000256794	0	0.000256794	0.000342392	0	0.269695		0	0
d__Bacteria; k__norank_d__Bacteria; p__Bacteroidota; c__Bacteroidia; o__Bacteroidales; f__Muribaculaceae; g__norank_f__Muribaculaceae; s__unclassified_g__norank_f__Muribaculaceae; OTU85	0.000256794	0.000513589	0	0	0	0.000770383	0	0	0	0	0	0	0	0	0	0	0	0	0.0345016		0	0
d__Bacteria; k__norank_d__Bacteria; p__Firmicutes; c__Clostridia; o__Oscillospirales; f__Ruminococcaceae; g__Eubacterium_siraeum_group; s__uncultured_bacterium_g__Eubacterium_siraeum_group; OTU187	8.55981e-05	4.27991e-05	0	0.000256794	0.000556388	0	0	0.000128397	0	0.000385192	0	0	0	0	0	4.27991e-05	0	0	0.180825		4.27991e-05	0
d__Bacteria; k__norank_d__Bacteria; p__Firmicutes; c__Clostridia; o__Oscillospirales; f__Ruminococcaceae; g__norank_f__Ruminococcaceae; s__unclassified_g__norank_f__Ruminococcaceae; OTU343	0	8.55981e-05	8.55981e-05	0.000171196	0.000213995	0	0	0	0	0	0	0	4.27991e-05	0	0.000213995	0.000427991	0.000256794	0	0.0433294		0	4.27991e-05
d__Bacteria; k__norank_d__Bacteria; p__Proteobacteria; c__Gammaproteobacteria; o__Cardiobacteriales; f__Wohlfahrtiimonadaceae; g__Ignatzschineria; s__Ignatzschineria_indica; OTU831	0	0	0	0	0	0	0	0	0	0	0.00136957	0	0	0	0	0	0	0	0.367879		0.000171196	0
d__Bacteria; k__norank_d__Bacteria; p__Firmicutes; c__Clostridia; o__Lachnospirales; f__Lachnospiraceae; g__Lachnospiraceae_NK4A136_group; s__uncultured_bacterium_g__Lachnospiraceae_NK4A136_group; OTU659	0	4.27991e-05	0	4.27991e-05	8.55981e-05	0	0	0	0	0.00128397	0	0	0	0	4.27991e-05	0	0	0	0.416082		0	0
d__Bacteria; k__norank_d__Bacteria; p__Bacteroidota; c__Bacteroidia; o__Bacteroidales; f__Muribaculaceae; g__norank_f__Muribaculaceae; s__uncultured_bacterium_g__norank_f__Muribaculaceae; OTU150	0	0.000128397	0	0.00115557	0	8.55981e-05	0	0	0	0	0	0	0	0	0	0	0	4.27991e-05	0.0901637		0	8.55981e-05
d__Bacteria; k__norank_d__Bacteria; p__Bacteroidota; c__Bacteroidia; o__Bacteroidales; f__Muribaculaceae; g__norank_f__Muribaculaceae; s__uncultured_bacterium_g__norank_f__Muribaculaceae; OTU460	4.27991e-05	0.000213995	0	0.000427991	0	0.000213995	0	0.000128397	0.000256794	0	0	0	0	4.27991e-05	0	0	0	0.000128397	0.310659		0	4.27991e-05
d__Bacteria; k__norank_d__Bacteria; p__Bacteroidota; c__Bacteroidia; o__Bacteroidales; f__unclassified_o__Bacteroidales; g__unclassified_o__Bacteroidales; s__unclassified_o__Bacteroidales; OTU329	0	0	0	0	0	0	0	0	4.27991e-05	0	0	0	0	0.00111278	0.000256794	4.27991e-05	4.27991e-05	0	0.0280578		0	0
d__Bacteria; k__norank_d__Bacteria; p__Firmicutes; c__Clostridia; o__Lachnospirales; f__Lachnospiraceae; g__norank_f__Lachnospiraceae; s__uncultured_bacterium_g__norank_f__Lachnospiraceae; OTU432	4.27991e-05	8.55981e-05	0	0	0	0	0	0	0	0	0	0	0	0	0.000727584	0	0.000641986	0	0.290905		0	0
d__Bacteria; k__norank_d__Bacteria; p__Actinobacteriota; c__Coriobacteriia; o__Coriobacteriales; f__Eggerthellaceae; g__Enterorhabdus; s__uncultured_bacterium_g__Enterorhabdus; OTU534	0	0	0	0	0	0	0.00106998	0.000213995	0	0.000213995	0	0	0	0	0	0	0	0	0.0342181		0	0
d__Bacteria; k__norank_d__Bacteria; p__Firmicutes; c__Clostridia; o__Lachnospirales; f__Lachnospiraceae; g__unclassified_f__Lachnospiraceae; s__unclassified_f__Lachnospiraceae; OTU485	0.000299593	4.27991e-05	4.27991e-05	0.000171196	0.000128397	0	0	0	0	0	0	0	8.55981e-05	0.000128397	4.27991e-05	0.000128397	0.000342392	4.27991e-05	0.00537802		0	0
d__Bacteria; k__norank_d__Bacteria; p__Bacteroidota; c__Bacteroidia; o__Bacteroidales; f__Prevotellaceae; g__Prevotellaceae_UCG-001; s__uncultured_bacterium_g__Prevotellaceae_UCG-001; OTU617	0	0	8.55981e-05	0	0	0	0	0	0.000641986	0	0	0	0	0.000342392	0.000171196	0.000213995	0	0	0.350275		0	0
d__Bacteria; k__norank_d__Bacteria; p__Bacteroidota; c__Bacteroidia; o__Bacteroidales; f__Muribaculaceae; g__norank_f__Muribaculaceae; s__uncultured_bacterium_g__norank_f__Muribaculaceae; OTU336	0	0	4.27991e-05	0	0	4.27991e-05	0	0	0.000342392	0	0	0	8.55981e-05	8.55981e-05	0.000770383	0	4.27991e-05	0	0.188622		0	4.27991e-05
d__Bacteria; k__norank_d__Bacteria; p__Firmicutes; c__Clostridia; o__Oscillospirales; f__Ruminococcaceae; g__unclassified_f__Ruminococcaceae; s__unclassified_f__Ruminococcaceae; OTU303	4.27991e-05	0.000128397	0.000128397	0.000128397	0	0	4.27991e-05	0.000171196	0	4.27991e-05	0	0	0	0.000213995	0.000171196	4.27991e-05	0.000299593	0	0.481707		0	0
d__Bacteria; k__norank_d__Bacteria; p__Bacteroidota; c__Bacteroidia; o__Bacteroidales; f__Prevotellaceae; g__Alloprevotella; s__uncultured_Bacteroidales_bacterium_g__Alloprevotella; OTU321	0	0	4.27991e-05	0	0	0	0	0	0.000599187	0	0	0	0	0.000256794	0.000128397	0.000385192	0	0	0.350275		0	0
d__Bacteria; k__norank_d__Bacteria; p__Bacteroidota; c__Bacteroidia; o__Bacteroidales; f__Prevotellaceae; g__Prevotellaceae_UCG-001; s__unclassified_g__Prevotellaceae_UCG-001; OTU271	0	0	0	0	0.000128397	0	0	0	0.000213995	0	0	0	0	0.000299593	0.000727584	0	0	0	0.587465		0	0
d__Bacteria; k__norank_d__Bacteria; p__Firmicutes; c__Bacilli; o__Bacillales; f__Planococcaceae; g__Sporosarcina; s__uncultured_bacterium_g__Sporosarcina; OTU716	0	0	0	0	0	0	0	0	0	0	0.00132677	0	0	0	0	0	0	0	0.367879		4.27991e-05	0
d__Bacteria; k__norank_d__Bacteria; p__Fusobacteriota; c__Fusobacteriia; o__Fusobacteriales; f__Fusobacteriaceae; g__Fusobacterium; s__Fusobacterium_ulcerans; OTU212	0	0	0	0	0	0	0	0	0	0	0.00136957	0	0	0	0	0	0	0	0.367879		0	0
d__Bacteria; k__norank_d__Bacteria; p__Bacteroidota; c__Bacteroidia; o__Bacteroidales; f__Muribaculaceae; g__norank_f__Muribaculaceae; s__uncultured_bacterium_g__norank_f__Muribaculaceae; OTU133	0	0	0.00136957	0	0	0	0	0	0	0	0	0	0	0	0	0	0	0	0.367879		0	0
d__Bacteria; k__norank_d__Bacteria; p__Bacteroidota; c__Bacteroidia; o__Bacteroidales; f__Prevotellaceae; g__Prevotellaceae_UCG-001; s__uncultured_bacterium_g__Prevotellaceae_UCG-001; OTU233	8.55981e-05	4.27991e-05	0	0	0	0	0	0	0	0	0	0	0.000299593	0	0	0	0	0.000385192	0.290905		0	0.000513589
d__Bacteria; k__norank_d__Bacteria; p__Bacteroidota; c__Bacteroidia; o__Bacteroidales; f__Rikenellaceae; g__Alistipes; s__Alistipes_sp._N15.MGS-157; OTU209	0.000171196	0	0	0	0	0.000213995	0	0	0	0	0	0	0.000128397	0	0	0	0	0.000513589	0.30402		0	0.000299593
d__Bacteria; k__norank_d__Bacteria; p__Firmicutes; c__Clostridia; o__Lachnospirales; f__Lachnospiraceae; g__unclassified_f__Lachnospiraceae; s__unclassified_f__Lachnospiraceae; OTU365	0.000427991	0.000385192	0	0	0	8.55981e-05	0	0	0	0	0	0	0	0	4.27991e-05	0.000342392	4.27991e-05	0	0.11993		0	0
d__Bacteria; k__norank_d__Bacteria; p__Proteobacteria; c__Gammaproteobacteria; o__Burkholderiales; f__Alcaligenaceae; g__Bordetella; s__unclassified_g__Bordetella; OTU809	0	0	0	0	0	0	0	0	0	0	4.27991e-05	0	0	8.55981e-05	8.55981e-05	4.27991e-05	0	0	0.10005		0.00106998	0
d__Bacteria; k__norank_d__Bacteria; p__Firmicutes; c__Clostridia; o__Oscillospirales; f__Oscillospiraceae; g__NK4A214_group; s__uncultured_bacterium_g__NK4A214_group; OTU169	0.000128397	0.000385192	0	0.000171196	8.55981e-05	4.27991e-05	0	4.27991e-05	0	0	4.27991e-05	0	0	0.000128397	0.000171196	8.55981e-05	0	4.27991e-05	0.074715		0	0
d__Bacteria; k__norank_d__Bacteria; p__Bacteroidota; c__Bacteroidia; o__Bacteroidales; f__Muribaculaceae; g__norank_f__Muribaculaceae; s__uncultured_bacterium_g__norank_f__Muribaculaceae; OTU751	0	0	0	0	0	0	0.000299593	0.000385192	0	0.000128397	0	0.00047079	0	0	0	0	0	0	0.00854298		4.27991e-05	0
d__Bacteria; k__norank_d__Bacteria; p__Bacteroidota; c__Bacteroidia; o__Bacteroidales; f__unclassified_o__Bacteroidales; g__unclassified_o__Bacteroidales; s__unclassified_o__Bacteroidales; OTU466	0	0.000128397	0	4.27991e-05	0	4.27991e-05	0	0	0	0	0	0	4.27991e-05	0	0	0	0	0.000513589	0.181482		0	0.000556388
d__Bacteria; k__norank_d__Bacteria; p__Firmicutes; c__Clostridia; o__Lachnospirales; f__Lachnospiraceae; g__norank_f__Lachnospiraceae; s__uncultured_bacterium_g__norank_f__Lachnospiraceae; OTU335	4.27991e-05	0.000171196	4.27991e-05	8.55981e-05	0	0	0	0	0	0	0	0	0	0	0.000641986	0	0.000342392	0	0.107875		0	0
d__Bacteria; k__norank_d__Bacteria; p__Bacteroidota; c__Bacteroidia; o__Bacteroidales; f__Muribaculaceae; g__norank_f__Muribaculaceae; s__uncultured_bacterium_g__norank_f__Muribaculaceae; OTU528	0	0	0	0	0	0	0.000171196	0	0	0.000984378	0	0.000171196	0	0	0	0	0	0	0.0342181		0	0
d__Bacteria; k__norank_d__Bacteria; p__Bacteroidota; c__Bacteroidia; o__Bacteroidales; f__Rikenellaceae; g__Rikenella; s__Rikenella_microfusus_DSM_15922; OTU581	0	0	0	0	0	0	0.000128397	0.00119837	0	0	0	0	0	0	0	0	0	0	0.120314		0	0
d__Bacteria; k__norank_d__Bacteria; p__Bacteroidota; c__Bacteroidia; o__Bacteroidales; f__Rikenellaceae; g__Alistipes; s__unclassified_g__Alistipes; OTU654	0	0	8.55981e-05	0	0.000256794	0	0	0	0.000213995	0	0	0	0	4.27991e-05	0.000342392	0.000128397	0.000213995	0	0.264097		0	0
d__Bacteria; k__norank_d__Bacteria; p__Actinobacteriota; c__Coriobacteriia; o__Coriobacteriales; f__Eggerthellaceae; g__Gordonibacter; s__uncultured_bacterium_g__Gordonibacter; OTU670	0	0	0	0	0	0	0.000641986	4.27991e-05	0	0.000342392	0	0.000256794	0	0	0	0	0	0	0.00854298		0	0
d__Bacteria; k__norank_d__Bacteria; p__Firmicutes; c__Clostridia; o__Peptococcales; f__Peptococcaceae; g__norank_f__Peptococcaceae; s__uncultured_bacterium_g__norank_f__Peptococcaceae; OTU36	4.27991e-05	8.55981e-05	4.27991e-05	0.000128397	0.000128397	4.27991e-05	0	4.27991e-05	4.27991e-05	0	0	0	4.27991e-05	0.000128397	4.27991e-05	0	0	0	0.0335511		0	0.000513589
d__Bacteria; k__norank_d__Bacteria; p__Firmicutes; c__Bacilli; o__unclassified_c__Bacilli; f__unclassified_c__Bacilli; g__unclassified_c__Bacilli; s__unclassified_c__Bacilli; OTU635	0	0	0.000171196	0	0	0	0.000299593	0	0.000256794	4.27991e-05	0	0.00047079	0	0	0	0	0	0	0.0287286		0	0
d__Bacteria; k__norank_d__Bacteria; p__Bacteroidota; c__Bacteroidia; o__Bacteroidales; f__Muribaculaceae; g__norank_f__Muribaculaceae; s__uncultured_bacterium_g__norank_f__Muribaculaceae; OTU461	4.27991e-05	0	0	0	0	0.000641986	0	0	0	4.27991e-05	0	0	0	0	4.27991e-05	0	0	0.000342392	0.70549		0	0.000128397
d__Bacteria; k__norank_d__Bacteria; p__Bacteroidota; c__Bacteroidia; o__Bacteroidales; f__Muribaculaceae; g__norank_f__Muribaculaceae; s__uncultured_bacterium_g__norank_f__Muribaculaceae; OTU667	0	0	0	0	0	0	0	0.000984378	0	0.000171196	0	8.55981e-05	0	0	0	0	0	0	0.0345016		0	0
d__Bacteria; k__norank_d__Bacteria; p__Proteobacteria; c__Alphaproteobacteria; o__Rhodospirillales; f__norank_o__Rhodospirillales; g__norank_f__norank_o__Rhodospirillales; s__gut_metagenome_g__norank; OTU112	0	8.55981e-05	0.00047079	0	0	4.27991e-05	0	0	0.000213995	0	0	0	8.55981e-05	0.000171196	0	4.27991e-05	0	8.55981e-05	0.404126		0	4.27991e-05
d__Bacteria; k__norank_d__Bacteria; p__Bacteroidota; c__Bacteroidia; o__Bacteroidales; f__Prevotellaceae; g__Alloprevotella; s__uncultured_Bacteroidales_bacterium_g__Alloprevotella; OTU71	4.27991e-05	0.000171196	0	0	0	0.000128397	0	0	0	0	0	0	4.27991e-05	0	0	0	0	0.000213995	0.176699		0	0.000599187
d__Bacteria; k__norank_d__Bacteria; p__Bacteroidota; c__Bacteroidia; o__Bacteroidales; f__Marinifilaceae; g__Odoribacter; s__uncultured_bacterium_g__Odoribacter; OTU631	0	0	0	0	0	0	0	0.000128397	0.000855981	0	0	0.000213995	0	0	0	0	0	0	0.0345016		0	0
d__Bacteria; k__norank_d__Bacteria; p__Bacteroidota; c__Bacteroidia; o__Bacteroidales; f__Muribaculaceae; g__norank_f__Muribaculaceae; s__unclassified_g__norank_f__Muribaculaceae; OTU96	0.000599187	0.000213995	0	0	0	4.27991e-05	0	0	0	0	0	0	4.27991e-05	4.27991e-05	0	8.55981e-05	8.55981e-05	4.27991e-05	0.0381718		0	4.27991e-05
d__Bacteria; k__norank_d__Bacteria; p__Bacteroidota; c__Bacteroidia; o__Bacteroidales; f__Marinifilaceae; g__Odoribacter; s__uncultured_bacterium_g__Odoribacter; OTU398	0	0	4.27991e-05	0	0	0	0	0	0.000171196	0	0	0	0	0	0	0.000684785	0.000299593	0	0.587465		0	0
d__Bacteria; k__norank_d__Bacteria; p__Proteobacteria; c__Gammaproteobacteria; o__Pseudomonadales; f__Moraxellaceae; g__Acinetobacter; s__Acinetobacter_lwoffii; OTU689	0	0	0	0	0	0	0	0	0	4.27991e-05	0.000299593	0	0	0	0	0	0	0	0.120314		0.000813182	0
d__Bacteria; k__norank_d__Bacteria; p__Bacteroidota; c__Bacteroidia; o__Bacteroidales; f__Muribaculaceae; g__norank_f__Muribaculaceae; s__unclassified_g__norank_f__Muribaculaceae; OTU72	4.27991e-05	0.000171196	0.000599187	0	0	0	0	0	0	0	0	0.000171196	0	4.27991e-05	0	4.27991e-05	0	4.27991e-05	0.475739		0	4.27991e-05
d__Bacteria; k__norank_d__Bacteria; p__Desulfobacterota; c__Desulfovibrionia; o__Desulfovibrionales; f__Desulfovibrionaceae; g__norank_f__Desulfovibrionaceae; s__uncultured_Desulfovibrionaceae_bacterium_g__norank; OTU244	4.27991e-05	4.27991e-05	0	0	0	0.000128397	0	0	0	0	0.000599187	0	0.000213995	0	0	0	0	8.55981e-05	0.736864		0	4.27991e-05
d__Bacteria; k__norank_d__Bacteria; p__Bacteroidota; c__Bacteroidia; o__Bacteroidales; f__unclassified_o__Bacteroidales; g__unclassified_o__Bacteroidales; s__unclassified_o__Bacteroidales; OTU166	8.55981e-05	4.27991e-05	0	0	0.000256794	0	0	0	0	0	0	0	0	0	0.000256794	0.000128397	0.000171196	8.55981e-05	0.05904		0	0.000128397
d__Bacteria; k__norank_d__Bacteria; p__Firmicutes; c__Bacilli; o__Bacillales; f__Bacillaceae; g__Pseudogracilibacillus; s__unclassified_g__Pseudogracilibacillus; OTU696	0	0	0	0	0	0	0	0	0	0	0.00111278	0	0	0	0	0	0	0	0.367879		4.27991e-05	0
d__Bacteria; k__norank_d__Bacteria; p__Firmicutes; c__Clostridia; o__Oscillospirales; f__Ruminococcaceae; g__Paludicola; s__uncultured_bacterium_g__Paludicola; OTU426	0.000213995	0	0	0	0	0.000171196	0	0	0	0	0	4.27991e-05	0.000128397	0	0	0.000128397	8.55981e-05	0.000171196	0.211567		0	0.000213995
d__Bacteria; k__norank_d__Bacteria; p__Firmicutes; c__Bacilli; o__unclassified_c__Bacilli; f__unclassified_c__Bacilli; g__unclassified_c__Bacilli; s__unclassified_c__Bacilli; OTU746	0	0	0	0	0	0	0.000813182	4.27991e-05	0	0	0	0.000213995	4.27991e-05	0	0	0	0	0	0.1005		0	0
d__Bacteria; k__norank_d__Bacteria; p__Firmicutes; c__Clostridia; o__Lachnospirales; f__Lachnospiraceae; g__unclassified_f__Lachnospiraceae; s__unclassified_f__Lachnospiraceae; OTU40	0.000342392	0	0	0	0.000299593	0.000385192	0	0	0	0	4.27991e-05	0	4.27991e-05	0	0	0	0	0	0.205318		0	0
d__Bacteria; k__norank_d__Bacteria; p__Bacteroidota; c__Bacteroidia; o__Bacteroidales; f__Muribaculaceae; g__norank_f__Muribaculaceae; s__unclassified_g__norank_f__Muribaculaceae; OTU28	8.55981e-05	0.000171196	0	0.000299593	0	8.55981e-05	0	0	0	0	0	0	8.55981e-05	0	0	0	0	0.000213995	0.0669388		0	0.000128397
d__Bacteria; k__norank_d__Bacteria; p__Bacteroidota; c__Bacteroidia; o__Bacteroidales; f__Muribaculaceae; g__norank_f__Muribaculaceae; s__uncultured_bacterium_g__norank_f__Muribaculaceae; OTU325	0	0	4.27991e-05	0	0	0	0	0	0.000556388	0	0	0	0	0.000128397	0.000171196	0.000171196	0	0	0.349667		0	0
d__Bacteria; k__norank_d__Bacteria; p__Firmicutes; c__Clostridia; o__Peptostreptococcales-Tissierellales; f__Anaerovoracaceae; g__Family_XIII_AD3011_group; s__unclassified_g__Family_XIII_AD3011_group; OTU661	4.27991e-05	4.27991e-05	0	0	0	8.55981e-05	0	0.000171196	0	0.000213995	0	0	8.55981e-05	0	0	0	0	0.000213995	0.994319		0	0.000171196
d__Bacteria; k__norank_d__Bacteria; p__Firmicutes; c__unclassified_p__Firmicutes; o__unclassified_p__Firmicutes; f__unclassified_p__Firmicutes; g__unclassified_p__Firmicutes; s__unclassified_p__Firmicutes; OTU155	0.000299593	0.000556388	0	0.000171196	0	0	0	0	0	0	0	0	0	0	0	0	0	0	0.0345016		0	0
d__Bacteria; k__norank_d__Bacteria; p__unclassified_k__norank_d__Bacteria; c__unclassified_k__norank_d__Bacteria; o__unclassified_k__norank_d__Bacteria; f__unclassified_k__norank_d__Bacteria; g__unclassified_k__norank_d__Bacteria; s__unclassified_k__norank_d__Bacteria; OTU382	0	0	0	0	0	0	0	0	0	0	0	0	0	0	0	0.000984378	4.27991e-05	0	0.120314		0	0
d__Bacteria; k__norank_d__Bacteria; p__Firmicutes; c__Clostridia; o__Lachnospirales; f__Lachnospiraceae; g__unclassified_f__Lachnospiraceae; s__unclassified_f__Lachnospiraceae; OTU114	4.27991e-05	0	0.000813182	4.27991e-05	8.55981e-05	0	0	0	0	0	0	0	0	0	0	0	0	0	0.00846403		0	0
d__Bacteria; k__norank_d__Bacteria; p__Firmicutes; c__Clostridia; o__Lachnospirales; f__Lachnospiraceae; g__unclassified_f__Lachnospiraceae; s__unclassified_f__Lachnospiraceae; OTU202	0	0.000299593	8.55981e-05	0	8.55981e-05	4.27991e-05	0	0	0	0	0	0	0	0	4.27991e-05	4.27991e-05	0.000385192	0	0.0639565		0	0
d__Bacteria; k__norank_d__Bacteria; p__Firmicutes; c__Bacilli; o__RF39; f__norank_o__RF39; g__norank_f__norank_o__RF39; s__uncultured_bacterium_g__norank_f__norank_o__RF39; OTU42	8.55981e-05	0.000770383	0	0	0	0	4.27991e-05	8.55981e-05	0	0	0	0	0	0	0	0	0	0	0.29587		0	0
d__Bacteria; k__norank_d__Bacteria; p__Firmicutes; c__Clostridia; o__Oscillospirales; f__Oscillospiraceae; g__norank_f__Oscillospiraceae; s__uncultured_bacterium_g__norank_f__Oscillospiraceae; OTU361	0	0	4.27991e-05	0	8.55981e-05	0	0	0	0	0	0	0	0	0	0	0.000513589	0.000342392	0	0.290905		0	0
d__Bacteria; k__norank_d__Bacteria; p__Bacteroidota; c__Bacteroidia; o__Bacteroidales; f__Prevotellaceae; g__Alloprevotella; s__uncultured_Bacteroidales_bacterium_g__Alloprevotella; OTU630	0	0	4.27991e-05	0	0	0	0	0	0.000342392	0	0	0	0	0.000556388	0	4.27991e-05	0	0	0.700306		0	0
d__Bacteria; k__norank_d__Bacteria; p__Bacteroidota; c__Bacteroidia; o__Bacteroidales; f__Muribaculaceae; g__norank_f__Muribaculaceae; s__uncultured_bacterium_g__norank_f__Muribaculaceae; OTU683	0	0	0	0	0	0	0	0	0	0.000984378	0	0	0	0	0	0	0	0	0.367879		0	0
d__Bacteria; k__norank_d__Bacteria; p__Firmicutes; c__Clostridia; o__Clostridia_vadinBB60_group; f__norank_o__Clostridia_vadinBB60_group; g__norank_f__norank_o__Clostridia_vadinBB60_group; s__unclassified_g__norank_f__norank_o__Clostridia_vadinBB60_group; OTU360	0	0	0	0	0	4.27991e-05	0	0	0	0	0	4.27991e-05	0	0	0.000256794	8.55981e-05	0.000556388	0	0.205318		0	0
d__Bacteria; k__norank_d__Bacteria; p__Firmicutes; c__Clostridia; o__Lachnospirales; f__Lachnospiraceae; g__Anaerostipes; s__Anaerostipes_caccae_DSM_14662; OTU711	0	0	0	0	0	0	0	0	0	0	0.000599187	0	0	0	0	0	0	0.000299593	0.586071		0	4.27991e-05
d__Bacteria; k__norank_d__Bacteria; p__Firmicutes; c__Clostridia; o__Oscillospirales; f__UCG-010; g__norank_f__UCG-010; s__uncultured_organism_g__norank_f__UCG-010; OTU611	0	0	0.00047079	0	0	0	0	4.27991e-05	0.000427991	0	0	0	0	0	0	0	0	0	0.363706		0	0
d__Bacteria; k__norank_d__Bacteria; p__Bacteroidota; c__Bacteroidia; o__Bacteroidales; f__Muribaculaceae; g__norank_f__Muribaculaceae; s__uncultured_bacterium_g__norank_f__Muribaculaceae; OTU214	0.000171196	4.27991e-05	0	0	0	0.000342392	0	0	0	0	0	0	0.000171196	0	0	0	0	4.27991e-05	0.154109		0	0.000171196
d__Bacteria; k__norank_d__Bacteria; p__Firmicutes; c__Clostridia; o__Clostridia_UCG-014; f__norank_o__Clostridia_UCG-014; g__norank_f__norank_o__Clostridia_UCG-014; s__unclassified_g__norank_f__norank_o__Clostridia_UCG-014; OTU557	0	0	0.000256794	0	0.000299593	0	0.000128397	0	0	0	0	4.27991e-05	0	0.000171196	0	0	4.27991e-05	0	0.903225		0	0
d__Bacteria; k__norank_d__Bacteria; p__Firmicutes; c__Clostridia; o__Peptococcales; f__Peptococcaceae; g__Peptococcus; s__uncultured_bacterium_g__Peptococcus; OTU418	0.000171196	0.000256794	0	0	4.27991e-05	8.55981e-05	0	0	0	4.27991e-05	0	0	0	0	0	0.000171196	0.000128397	0	0.169145		0	0
d__Bacteria; k__norank_d__Bacteria; p__Bacteroidota; c__Bacteroidia; o__Bacteroidales; f__unclassified_o__Bacteroidales; g__unclassified_o__Bacteroidales; s__unclassified_o__Bacteroidales; OTU143	0	0	0.000727584	0	0	0	0	0	0	0	0	0	0	8.55981e-05	8.55981e-05	0	0	0	0.362805		0	0
d__Bacteria; k__norank_d__Bacteria; p__Bacteroidota; c__Bacteroidia; o__Bacteroidales; f__Prevotellaceae; g__Prevotellaceae_Ga6A1_group; s__uncultured_bacterium_g__Prevotellaceae_Ga6A1_group; OTU527	0	0	0	0	0	0	0.00089878	0	0	0	0	0	0	0	0	0	0	0	0.367879		0	0
d__Bacteria; k__norank_d__Bacteria; p__Firmicutes; c__Bacilli; o__Acholeplasmatales; f__Acholeplasmataceae; g__Anaeroplasma; s__uncultured_bacterium_g__Anaeroplasma; OTU63	0	0.000128397	0	0.000171196	0	8.55981e-05	0	0	0	0	0	0	0	0.000427991	0	0	8.55981e-05	0	0.176699		0	0
d__Bacteria; k__norank_d__Bacteria; p__Firmicutes; c__Bacilli; o__Erysipelotrichales; f__Erysipelotrichaceae; g__Faecalibaculum; s__uncultured_bacterium_g__Faecalibaculum; OTU771	0	0	8.55981e-05	0	0	0	8.55981e-05	4.27991e-05	0	8.55981e-05	0	0.000599187	0	0	0	0	0	0	0.036535		0	0
d__Bacteria; k__norank_d__Bacteria; p__Firmicutes; c__Bacilli; o__Erysipelotrichales; f__Erysipelatoclostridiaceae; g__Erysipelatoclostridium; s__uncultured_bacterium_g__Erysipelatoclostridium; OTU586	0	0	0.000128397	0	0	4.27991e-05	0	0.000128397	0	0.000171196	0	0	4.27991e-05	0.000342392	0	0	0	0	0.973319		0	4.27991e-05
d__Bacteria; k__norank_d__Bacteria; p__Bacteroidota; c__Bacteroidia; o__Bacteroidales; f__Muribaculaceae; g__norank_f__Muribaculaceae; s__uncultured_bacterium_g__norank_f__Muribaculaceae; OTU206	0	0	8.55981e-05	0	0	0.000342392	0	0	0	0	0	0	4.27991e-05	0	0	0	4.27991e-05	4.27991e-05	0.199426		0	0.000342392
d__Bacteria; k__norank_d__Bacteria; p__Actinobacteriota; c__Coriobacteriia; o__Coriobacteriales; f__Eggerthellaceae; g__norank_f__Eggerthellaceae; s__uncultured_Coriobacteriales_bacterium_g__norank; OTU8	4.27991e-05	8.55981e-05	0	8.55981e-05	0	4.27991e-05	0.000128397	0	0	0.00047079	0	0	0	4.27991e-05	0	0	0	0	0.26981		0	0
d__Bacteria; k__norank_d__Bacteria; p__Bacteroidota; c__Bacteroidia; o__Bacteroidales; f__Rikenellaceae; g__Alistipes; s__unclassified_g__Alistipes; OTU653	0	0	0.000171196	0	0	0	0	0	8.55981e-05	0	0	0	0.000128397	0	0	0	0	0.000299593	0.659561		0	0.000213995
d__Bacteria; k__norank_d__Bacteria; p__Actinobacteriota; c__Coriobacteriia; o__Coriobacteriales; f__Eggerthellaceae; g__Enterorhabdus; s__uncultured_bacterium_g__Enterorhabdus; OTU162	0	4.27991e-05	4.27991e-05	0.000299593	4.27991e-05	4.27991e-05	4.27991e-05	0	0	0.000171196	0	0	0	0	0	0	0	0.000213995	0.144908		0	0
d__Bacteria; k__norank_d__Bacteria; p__Firmicutes; c__Clostridia; o__Oscillospirales; f__Oscillospiraceae; g__norank_f__Oscillospiraceae; s__uncultured_bacterium_g__norank_f__Oscillospiraceae; OTU456	4.27991e-05	8.55981e-05	0	0	4.27991e-05	0	4.27991e-05	0	0	0	0	0	0	0.000256794	0	0.000128397	0.000256794	0	0.26981		0	0
d__Bacteria; k__norank_d__Bacteria; p__Firmicutes; c__Clostridia; o__Clostridia_vadinBB60_group; f__norank_o__Clostridia_vadinBB60_group; g__norank_f__norank_o__Clostridia_vadinBB60_group; s__unclassified_g__norank_f__norank_o__Clostridia_vadinBB60_group; OTU446	0	0	0	0	0	0	0	0	0	0	0	0	0	0.000171196	0	0.000128397	0.000556388	0	0.0345016		0	0
d__Bacteria; k__norank_d__Bacteria; p__Firmicutes; c__Clostridia; o__Christensenellales; f__Christensenellaceae; g__norank_f__Christensenellaceae; s__uncultured_bacterium_g__norank_f__Christensenellaceae; OTU511	4.27991e-05	0	0.000171196	4.27991e-05	0	0	0	0	0	0	0	0	0.000213995	0	0	0	4.27991e-05	8.55981e-05	0.129153		0	0.000256794
d__Bacteria; k__norank_d__Bacteria; p__Firmicutes; c__Bacilli; o__Lactobacillales; f__Carnobacteriaceae; g__Atopostipes; s__uncultured_bacterium_g__Atopostipes; OTU828	0	0	0	0	0	0	0	0	0	0	0.000770383	0	0	0	0	0	0	0	0.367879		8.55981e-05	0
d__Bacteria; k__norank_d__Bacteria; p__Bacteroidota; c__Bacteroidia; o__Bacteroidales; f__Marinifilaceae; g__Butyricimonas; s__uncultured_bacterium_g__Butyricimonas; OTU30	0	0	0	0	0	0	0	0	0	0	0	0	0	0	4.27991e-05	0	4.27991e-05	8.55981e-05	0.0342181		0	0.000684785
d__Bacteria; k__norank_d__Bacteria; p__Firmicutes; c__Bacilli; o__Erysipelotrichales; f__Erysipelotrichaceae; g__norank_f__Erysipelotrichaceae; s__uncultured_bacterium_g__norank_f__Erysipelotrichaceae; OTU16	0.000513589	4.27991e-05	8.55981e-05	0	0	0	0	0.000128397	0	8.55981e-05	0	0	0	0	0	0	0	0	0.176699		0	0
d__Bacteria; k__norank_d__Bacteria; p__unclassified_k__norank_d__Bacteria; c__unclassified_k__norank_d__Bacteria; o__unclassified_k__norank_d__Bacteria; f__unclassified_k__norank_d__Bacteria; g__unclassified_k__norank_d__Bacteria; s__unclassified_k__norank_d__Bacteria; OTU437	0	0	0	0	0	0	0	0	0	0	0	0	0	0	4.27991e-05	0	0.000813182	0	0.120314		0	0
d__Bacteria; k__norank_d__Bacteria; p__Bacteroidota; c__Bacteroidia; o__Bacteroidales; f__Muribaculaceae; g__norank_f__Muribaculaceae; s__uncultured_bacterium_g__norank_f__Muribaculaceae; OTU607	0	0	0	0	0	0	0	0.000855981	0	0	0	0	0	0	0	0	0	0	0.367879		0	0
d__Bacteria; k__norank_d__Bacteria; p__Firmicutes; c__Clostridia; o__Lachnospirales; f__Lachnospiraceae; g__Lachnospiraceae_UCG-010; s__uncultured_bacterium_g__Lachnospiraceae_UCG-010; OTU201	0.000128397	0.000299593	0	0	4.27991e-05	0.000128397	0	0	0	0	0	0	0	0	4.27991e-05	4.27991e-05	0	0	0.0393794		0	0.000128397
d__Bacteria; k__norank_d__Bacteria; p__Firmicutes; c__Clostridia; o__Lachnospirales; f__Lachnospiraceae; g__unclassified_f__Lachnospiraceae; s__unclassified_f__Lachnospiraceae; OTU23	0.000385192	4.27991e-05	0	0	0	0	4.27991e-05	0	0	0	0	0	8.55981e-05	4.27991e-05	0	0	0	0.000128397	0.431357		0	8.55981e-05
d__Bacteria; k__norank_d__Bacteria; p__Proteobacteria; c__Alphaproteobacteria; o__Sphingomonadales; f__Sphingomonadaceae; g__Sphingomonas; s__unclassified_g__Sphingomonas; OTU729	0	0	0	0	0	0	0	4.27991e-05	0	0	0.000556388	0	0	0	0	0	0	0	0.120314		0.000213995	0
d__Bacteria; k__norank_d__Bacteria; p__Proteobacteria; c__Alphaproteobacteria; o__Rhizobiales; f__Rhizobiaceae; g__unclassified_f__Rhizobiaceae; s__unclassified_f__Rhizobiaceae; OTU691	0	0	0	0	0	0	0	0	0	0	8.55981e-05	0	0	0	0	0	0	0	0.367879		0.000727584	0
d__Bacteria; k__norank_d__Bacteria; p__Firmicutes; c__Bacilli; o__Erysipelotrichales; f__Erysipelotrichaceae; g__norank_f__Erysipelotrichaceae; s__unclassified_g__norank_f__Erysipelotrichaceae; OTU151	0	0	0	0.000684785	4.27991e-05	0	0	0	0	0	0	0	0	0	0	0	0	8.55981e-05	0.325547		0	0
d__Bacteria; k__norank_d__Bacteria; p__Cyanobacteria; c__Vampirivibrionia; o__Gastranaerophilales; f__norank_o__Gastranaerophilales; g__norank_f__norank_o__Gastranaerophilales; s__uncultured_bacterium_g__norank_f__norank_o__Gastranaerophilales; OTU294	0	0	0	0	4.27991e-05	0	8.55981e-05	4.27991e-05	0	8.55981e-05	0	0	4.27991e-05	0.000256794	0.000256794	0	0	0	0.316119		0	0
d__Bacteria; k__norank_d__Bacteria; p__Firmicutes; c__Clostridia; o__Clostridia_UCG-014; f__norank_o__Clostridia_UCG-014; g__norank_f__norank_o__Clostridia_UCG-014; s__unclassified_g__norank_f__norank_o__Clostridia_UCG-014; OTU182	8.55981e-05	0	0.000128397	0	0.000342392	0	0	0	0	0	0	0	0	0	0.000213995	0	4.27991e-05	0	0.155065		0	0
d__Bacteria; k__norank_d__Bacteria; p__Firmicutes; c__Clostridia; o__Lachnospirales; f__Lachnospiraceae; g__unclassified_f__Lachnospiraceae; s__unclassified_f__Lachnospiraceae; OTU264	0.000385192	4.27991e-05	0	0	0	0	4.27991e-05	0	0	0	0	0	0	0.000128397	0	0	0.000213995	0	0.672747		0	0
d__Bacteria; k__norank_d__Bacteria; p__Bacteroidota; c__Bacteroidia; o__Bacteroidales; f__Muribaculaceae; g__norank_f__Muribaculaceae; s__uncultured_bacterium_g__norank_f__Muribaculaceae; OTU282	0	0	0	0	0	0	0	0.000171196	0	8.55981e-05	0	8.55981e-05	0	0.000128397	0	0	0.000342392	0	0.193625		0	0
d__Bacteria; k__norank_d__Bacteria; p__Firmicutes; c__Clostridia; o__Oscillospirales; f__Ruminococcaceae; g__Anaerotruncus; s__unclassified_g__Anaerotruncus; OTU480	0	0	0	0	0.000128397	0	4.27991e-05	0	0	0	0	0	4.27991e-05	0	0.000213995	0	0	0.000256794	0.275914		0	0.000128397
d__Bacteria; k__norank_d__Bacteria; p__Firmicutes; c__Clostridia; o__Lachnospirales; f__Lachnospiraceae; g__norank_f__Lachnospiraceae; s__uncultured_bacterium_g__norank_f__Lachnospiraceae; OTU387	0	0	0	8.55981e-05	0	0	0	0	0	0	0	0	0	0	0	0.000256794	0.00047079	0	0.283428		0	0
d__Bacteria; k__norank_d__Bacteria; p__Firmicutes; c__Clostridia; o__Lachnospirales; f__Lachnospiraceae; g__unclassified_f__Lachnospiraceae; s__unclassified_f__Lachnospiraceae; OTU415	0	0	0.000342392	0	0	0	0	0	0	0	0	0	0	0	0	4.27991e-05	0.000427991	0	0.325547		0	0
d__Bacteria; k__norank_d__Bacteria; p__Firmicutes; c__Bacilli; o__Lactobacillales; f__Aerococcaceae; g__Facklamia; s__unclassified_g__Facklamia; OTU811	0	0	0	0	0	0	0	0	0	0	0.000599187	0	0	0	0	0	0	0	0.367879		0.000213995	0
d__Bacteria; k__norank_d__Bacteria; p__Bacteroidota; c__Bacteroidia; o__Bacteroidales; f__Muribaculaceae; g__norank_f__Muribaculaceae; s__unclassified_g__norank_f__Muribaculaceae; OTU464	0	8.55981e-05	0.000128397	0	0	4.27991e-05	0	0	0.000128397	0	0	0	0	0.000128397	0	4.27991e-05	0	8.55981e-05	0.564392		0	0.000128397
d__Bacteria; k__norank_d__Bacteria; p__Bacteroidota; c__Bacteroidia; o__Bacteroidales; f__Rikenellaceae; g__Alistipes; s__uncultured_bacterium_g__Alistipes; OTU652	0	0	0.000128397	0	0	0	0	4.27991e-05	0.000171196	0	0	0	0	8.55981e-05	0.000171196	0	0.000171196	0	0.431357		0	0
d__Bacteria; k__norank_d__Bacteria; p__Firmicutes; c__Clostridia; o__Clostridia_vadinBB60_group; f__norank_o__Clostridia_vadinBB60_group; g__norank_f__norank_o__Clostridia_vadinBB60_group; s__uncultured_bacterium_g__norank_f__norank_o__Clostridia_vadinBB60_group; OTU170	0	4.27991e-05	0	4.27991e-05	0.000641986	0	0	0	0	0	0	0	0	0	4.27991e-05	0	0	0	0.110496		0	0
d__Bacteria; k__norank_d__Bacteria; p__Firmicutes; c__Bacilli; o__Bacillales; f__Planococcaceae; g__Solibacillus; s__Solibacillus_silvestris; OTU822	0	0	0	0	0	0	0	0	0	0	0.000427991	0	0	0	0	0	0	0	0.367879		0.000342392	0
d__Bacteria; k__norank_d__Bacteria; p__unclassified_k__norank_d__Bacteria; c__unclassified_k__norank_d__Bacteria; o__unclassified_k__norank_d__Bacteria; f__unclassified_k__norank_d__Bacteria; g__unclassified_k__norank_d__Bacteria; s__unclassified_k__norank_d__Bacteria; OTU355	0	4.27991e-05	0	0	0.000213995	0	0	0	0.000171196	0	0	0	0	8.55981e-05	4.27991e-05	0.000213995	0	0	0.548154		0	0
d__Bacteria; k__norank_d__Bacteria; p__Bacteroidota; c__Bacteroidia; o__Bacteroidales; f__Muribaculaceae; g__norank_f__Muribaculaceae; s__uncultured_Bacteroidales_bacterium_g__norank_f__Muribaculaceae; OTU267	0	0	0.000128397	0	0	4.27991e-05	0	0	8.55981e-05	0	0	0	4.27991e-05	0.000427991	0	4.27991e-05	0	0	0.547184		0	0
d__Bacteria; k__norank_d__Bacteria; p__Proteobacteria; c__Alphaproteobacteria; o__Rhizobiales; f__Xanthobacteraceae; g__Bradyrhizobium; s__Bradyrhizobium_japonicum_g__Bradyrhizobium; OTU694	0	0	0	0	0	0	0	0	0	8.55981e-05	0.000513589	0	0	0	0	0	0	0	0.120314		0.000171196	0
d__Bacteria; k__norank_d__Bacteria; p__Firmicutes; c__Clostridia; o__Lachnospirales; f__Lachnospiraceae; g__unclassified_f__Lachnospiraceae; s__unclassified_f__Lachnospiraceae; OTU368	4.27991e-05	4.27991e-05	0	0	0	0	0	0	0	0	0	0	0	0	0.000385192	0.000299593	0	0	0.290205		0	0
d__Bacteria; k__norank_d__Bacteria; p__Firmicutes; c__Clostridia; o__Clostridia_vadinBB60_group; f__norank_o__Clostridia_vadinBB60_group; g__norank_f__norank_o__Clostridia_vadinBB60_group; s__uncultured_bacterium_g__norank_f__norank_o__Clostridia_vadinBB60_group; OTU137	0	4.27991e-05	0.000641986	0	0	0	0	4.27991e-05	0	0	0	0	0	0	0	0	0	0	0.303926		0	0
d__Bacteria; k__norank_d__Bacteria; p__Firmicutes; c__Clostridia; o__unclassified_c__Clostridia; f__unclassified_c__Clostridia; g__unclassified_c__Clostridia; s__unclassified_c__Clostridia; OTU161	4.27991e-05	0	0	0.000342392	0.000171196	0	0	0	0	0	0	0	0	0	0	0.000171196	0	0	0.12397		0	0
d__Bacteria; k__norank_d__Bacteria; p__Firmicutes; c__Clostridia; o__Lachnospirales; f__Lachnospiraceae; g__norank_f__Lachnospiraceae; s__unclassified_g__norank_f__Lachnospiraceae; OTU421	4.27991e-05	0	0	0	4.27991e-05	0	0	0	0	0	0	4.27991e-05	0	4.27991e-05	4.27991e-05	4.27991e-05	0.00047079	0	0.171377		0	0
d__Bacteria; k__norank_d__Bacteria; p__Firmicutes; c__Clostridia; o__Lachnospirales; f__Lachnospiraceae; g__norank_f__Lachnospiraceae; s__unclassified_g__norank_f__Lachnospiraceae; OTU455	0	0	0	0	0	0	0	0	0	0	0	0	0	0	0.000342392	0	0.000385192	0	0.120314		0	0
d__Bacteria; k__norank_d__Bacteria; p__Firmicutes; c__Clostridia; o__Oscillospirales; f__Ruminococcaceae; g__norank_f__Ruminococcaceae; s__unclassified_g__norank_f__Ruminococcaceae; OTU305	0	0	8.55981e-05	0	0.000385192	0	0	0	4.27991e-05	0	0	0	0	4.27991e-05	8.55981e-05	0	4.27991e-05	0	0.488365		0	0
d__Bacteria; k__norank_d__Bacteria; p__Firmicutes; c__Clostridia; o__Lachnospirales; f__Lachnospiraceae; g__unclassified_f__Lachnospiraceae; s__unclassified_f__Lachnospiraceae; OTU470	0	0	0	0	0	8.55981e-05	0	0	0	0	0	0	0	0	0	0	0	0.000256794	0.586071		0	0.000342392
d__Bacteria; k__norank_d__Bacteria; p__Firmicutes; c__Bacilli; o__Lactobacillales; f__unclassified_o__Lactobacillales; g__unclassified_o__Lactobacillales; s__unclassified_o__Lactobacillales; OTU638	0	0	0	0	0	0	0.000171196	0	0.000171196	0	0.000213995	4.27991e-05	0	4.27991e-05	0	4.27991e-05	0	0	0.0393794		0	0
d__Bacteria; k__norank_d__Bacteria; p__Firmicutes; c__Clostridia; o__Lachnospirales; f__Lachnospiraceae; g__Lachnospiraceae_UCG-001; s__unclassified_g__Lachnospiraceae_UCG-001; OTU487	4.27991e-05	0	4.27991e-05	0	4.27991e-05	0	0	0	0	0	0	8.55981e-05	0	0	0	4.27991e-05	0	0.000213995	0.671766		0	0.000213995
d__Bacteria; k__norank_d__Bacteria; p__Firmicutes; c__Clostridia; o__Oscillospirales; f__Ruminococcaceae; g__Anaerotruncus; s__uncultured_bacterium_g__Anaerotruncus; OTU422	4.27991e-05	4.27991e-05	0	0	0	0	0	0	0	0	0	0	4.27991e-05	8.55981e-05	4.27991e-05	0.000171196	0.000128397	0	0.00981527		0	8.55981e-05
d__Bacteria; k__norank_d__Bacteria; p__Firmicutes; c__Clostridia; o__Clostridia_UCG-014; f__norank_o__Clostridia_UCG-014; g__norank_f__norank_o__Clostridia_UCG-014; s__uncultured_bacterium_g__norank_f__norank_o__Clostridia_UCG-014; OTU665	0	0	4.27991e-05	0	0	0	0	0	0	0.000556388	0	0	0	0	0	4.27991e-05	0	0	0.989637		0	0
d__Bacteria; k__norank_d__Bacteria; p__Bacteroidota; c__Bacteroidia; o__Bacteroidales; f__Prevotellaceae; g__unclassified_f__Prevotellaceae; s__unclassified_f__Prevotellaceae; OTU237	0	0	0	0	0	0	0	0	0	0	0	0	0.000128397	0	0	0	0	0.000171196	0.120314		0	0.000342392
d__Bacteria; k__norank_d__Bacteria; p__Firmicutes; c__Clostridia; o__Lachnospirales; f__Lachnospiraceae; g__Butyrivibrio; s__unclassified_g__Butyrivibrio; OTU570	0	0	0	0	0	0	0	0.000641986	0	0	0	0	0	0	0	0	0	0	0.367879		0	0
d__Bacteria; k__norank_d__Bacteria; p__Firmicutes; c__Bacilli; o__Erysipelotrichales; f__Erysipelotrichaceae; g__norank_f__Erysipelotrichaceae; s__uncultured_bacterium_g__norank_f__Erysipelotrichaceae; OTU788	0	0	0	4.27991e-05	4.27991e-05	0	0	0	0	0	0	4.27991e-05	8.55981e-05	0	0.000128397	0	0.000128397	4.27991e-05	0.100483		0.000128397	0
d__Bacteria; k__norank_d__Bacteria; p__Firmicutes; c__Clostridia; o__Clostridia_vadinBB60_group; f__norank_o__Clostridia_vadinBB60_group; g__norank_f__norank_o__Clostridia_vadinBB60_group; s__unclassified_g__norank_f__norank_o__Clostridia_vadinBB60_group; OTU359	0	0	0	0	8.55981e-05	0	0	0	0	0	0	0	0	0	0.000256794	0.000213995	8.55981e-05	0	0.1005		0	0
d__Bacteria; k__norank_d__Bacteria; p__Firmicutes; c__Clostridia; o__Oscillospirales; f__UCG-010; g__norank_f__UCG-010; s__unclassified_g__norank_f__UCG-010; OTU215	0.000385192	4.27991e-05	4.27991e-05	0	0	4.27991e-05	0	0	8.55981e-05	0	0	0	0	0	0	0	4.27991e-05	0	0.142683		0	0
d__Bacteria; k__norank_d__Bacteria; p__Firmicutes; c__unclassified_p__Firmicutes; o__unclassified_p__Firmicutes; f__unclassified_p__Firmicutes; g__unclassified_p__Firmicutes; s__unclassified_p__Firmicutes; OTU198	0	0	0	0	0.000427991	0	0	0	0	0	0	0	0	0	0.000171196	0	4.27991e-05	0	0.363706		0	0
d__Bacteria; k__norank_d__Bacteria; p__Bacteroidota; c__Bacteroidia; o__Bacteroidales; f__Marinifilaceae; g__Butyricimonas; s__uncultured_bacterium_g__Butyricimonas; OTU218	0	0	0	0	0	4.27991e-05	0	0	0	0	0	0	0	0	0	0	0	8.55981e-05	0.586071		0	0.000513589
d__Bacteria; k__norank_d__Bacteria; p__Firmicutes; c__Clostridia; o__Lachnospirales; f__Lachnospiraceae; g__Tuzzerella; s__uncultured_bacterium_g__Tuzzerella; OTU127	0	4.27991e-05	8.55981e-05	0	0.000213995	0	0	4.27991e-05	0	0	0	0	0	0	8.55981e-05	0.000128397	4.27991e-05	0	0.325782		0	0
d__Bacteria; k__norank_d__Bacteria; p__Firmicutes; c__Clostridia; o__Clostridia_vadinBB60_group; f__norank_o__Clostridia_vadinBB60_group; g__norank_f__norank_o__Clostridia_vadinBB60_group; s__uncultured_Clostridiales_bacterium_g__norank_f__norank_o__Clostridia_vadinBB60_group; OTU406	0	0	0	0	0	4.27991e-05	0	0	0	0	0	0	0	0	8.55981e-05	0.000213995	0.000256794	0	0.0901637		0	0
d__Bacteria; k__norank_d__Bacteria; p__Actinobacteriota; c__Actinobacteria; o__Micrococcales; f__Microbacteriaceae; g__Microbacterium; s__Microbacterium_keratanolyticum; OTU812	0	0	0	0	0	0	0	0	0	0	0.000128397	0	0	0	0	0	0	0	0.367879		0.00047079	0
d__Bacteria; k__norank_d__Bacteria; p__Proteobacteria; c__Alphaproteobacteria; o__Rhodospirillales; f__norank_o__Rhodospirillales; g__norank_f__norank_o__Rhodospirillales; s__gut_metagenome_g__norank; OTU489	0	0	0	0	0	0.000385192	0	0	0	0	0	0	0	0	0	0	0	0	0.367879		0	0.000213995
d__Bacteria; k__norank_d__Bacteria; p__Proteobacteria; c__Gammaproteobacteria; o__Enterobacterales; f__Yersiniaceae; g__Serratia; s__Serratia_marcescens_g__Serratia; OTU791	0	0	0	0	0	0	0	0	0	0	0.000513589	0	0	0	0	0	0	0	0.367879		8.55981e-05	0
d__Bacteria; k__norank_d__Bacteria; p__Firmicutes; c__Clostridia; o__norank_c__Clostridia; f__norank_o__norank_c__Clostridia; g__norank_f__norank_o__norank_c__Clostridia; s__uncultured_bacterium_g__norank_f__norank_o__norank_c__Clostridia; OTU317	0	0	0.000171196	0	4.27991e-05	0	0	0	0	0	0	8.55981e-05	0	0	0.000256794	0	0	0	0.804337		0	0
d__Bacteria; k__norank_d__Bacteria; p__Firmicutes; c__Clostridia; o__Peptostreptococcales-Tissierellales; f__Anaerovoracaceae; g__Eubacterium_brachy_group; s__uncultured_bacterium_g__Eubacterium_brachy_group; OTU781	4.27991e-05	0	0	0	4.27991e-05	0	0.000128397	0	0	0	0	4.27991e-05	4.27991e-05	4.27991e-05	0.000171196	0	0	4.27991e-05	0.412257		0	0
d__Bacteria; k__norank_d__Bacteria; p__Firmicutes; c__Bacilli; o__RF39; f__norank_o__RF39; g__norank_f__norank_o__RF39; s__uncultured_bacterium_g__norank_f__norank_o__RF39; OTU192	0	0	0	0	0.000385192	0	0	0	0	0	0	0	0	0	0.000171196	0	0	0	0.586071		0	0
d__Bacteria; k__norank_d__Bacteria; p__Firmicutes; c__Clostridia; o__Clostridia_UCG-014; f__norank_o__Clostridia_UCG-014; g__norank_f__norank_o__Clostridia_UCG-014; s__unclassified_g__norank_f__norank_o__Clostridia_UCG-014; OTU78	0	0.000427991	0	0.000128397	0	0	0	0	0	0	0	0	0	0	0	0	0	0	0.120314		0	0
d__Bacteria; k__norank_d__Bacteria; p__Firmicutes; c__Bacilli; o__Bacillales; f__Bacillaceae; g__Bacillus; s__Bacillus_cellulasensis; OTU737	0	0	0	0	0	0	0	0	0	0	0.000299593	0	0	0	0	0	0	0	0.367879		0.000213995	0
d__Bacteria; k__norank_d__Bacteria; p__Firmicutes; c__Bacilli; o__Erysipelotrichales; f__Erysipelatoclostridiaceae; g__Erysipelatoclostridium; s__uncultured_bacterium_g__Erysipelatoclostridium; OTU506	0	0	0	0	0	0	0	0	4.27991e-05	0	0	0	0	0	0	0	0	0.000213995	0.586071		0	0.000256794
d__Bacteria; k__norank_d__Bacteria; p__Desulfobacterota; c__Desulfovibrionia; o__Desulfovibrionales; f__Desulfovibrionaceae; g__unclassified_f__Desulfovibrionaceae; s__unclassified_f__Desulfovibrionaceae; OTU194	0	0	0	0	0.000171196	0	0	0	0	0	0	0	0	4.27991e-05	4.27991e-05	0.000128397	0.000128397	0	0.0590935		0	0
d__Bacteria; k__norank_d__Bacteria; p__Firmicutes; c__Clostridia; o__unclassified_c__Clostridia; f__unclassified_c__Clostridia; g__unclassified_c__Clostridia; s__unclassified_c__Clostridia; OTU495	0	4.27991e-05	0	0	0	4.27991e-05	0	0	0	0	0	0	4.27991e-05	0.000213995	0	0	0	8.55981e-05	0.136769		0	8.55981e-05
d__Bacteria; k__norank_d__Bacteria; p__Firmicutes; c__Bacilli; o__Bacillales; f__Bacillaceae; g__Bacillus; s__Bacillus_gibsonii; OTU782	0	0	0	0	0	0	0	0	0	0	0.000513589	0	0	0	0	0	0	0	0.367879		0	0
d__Bacteria; k__norank_d__Bacteria; p__Firmicutes; c__Clostridia; o__Christensenellales; f__Christensenellaceae; g__Christensenellaceae_R-7_group; s__unclassified_g__Christensenellaceae_R-7_group; OTU31	0.000513589	0	0	0	0	0	0	0	0	0	0	0	0	0	0	0	0	0	0.367879		0	0
d__Bacteria; k__norank_d__Bacteria; p__Firmicutes; c__Bacilli; o__RF39; f__norank_o__RF39; g__norank_f__norank_o__RF39; s__unclassified_g__norank_f__norank_o__RF39; OTU773	0	0	4.27991e-05	0	0	0	0	0	0	0.000385192	0	8.55981e-05	0	0	0	0	0	0	0.283428		0	0
d__Bacteria; k__norank_d__Bacteria; p__Firmicutes; c__Bacilli; o__RF39; f__norank_o__RF39; g__norank_f__norank_o__RF39; s__unclassified_g__norank_f__norank_o__RF39; OTU318	0	0	8.55981e-05	0	0	0	0	0	0	0	0	0	0	0	0.000427991	0	0	0	0.586071		0	0
d__Bacteria; k__norank_d__Bacteria; p__Bacteroidota; c__Bacteroidia; o__Bacteroidales; f__Muribaculaceae; g__norank_f__Muribaculaceae; s__uncultured_bacterium_g__norank_f__Muribaculaceae; OTU503	4.27991e-05	8.55981e-05	0	0	0	0	0	0	4.27991e-05	0	0	0	0	0	0	0	0	8.55981e-05	0.733523		0	0.000256794
d__Bacteria; k__norank_d__Bacteria; p__Firmicutes; c__Clostridia; o__Clostridia_UCG-014; f__norank_o__Clostridia_UCG-014; g__norank_f__norank_o__Clostridia_UCG-014; s__unclassified_g__norank_f__norank_o__Clostridia_UCG-014; OTU550	0	0.000213995	0	0	0	0	0.000256794	4.27991e-05	0	0	0	0	0	0	0	0	0	0	0.325547		0	0
d__Bacteria; k__norank_d__Bacteria; p__Bacteroidota; c__Bacteroidia; o__Bacteroidales; f__Muribaculaceae; g__norank_f__Muribaculaceae; s__uncultured_bacterium_g__norank_f__Muribaculaceae; OTU643	4.27991e-05	0	4.27991e-05	0	0	0	0	0	0	0	0	0	0	0	0.000256794	4.27991e-05	4.27991e-05	4.27991e-05	0.0533104		0	0
d__Bacteria; k__norank_d__Bacteria; p__Actinobacteriota; c__Coriobacteriia; o__Coriobacteriales; f__Eggerthellaceae; g__DNF00809; s__uncultured_bacterium_g__DNF00809; OTU551	0	0	0	0	0	0	0.000213995	8.55981e-05	0	0	0	0.000171196	0	0	0	0	0	0	0.0345016		0	0
d__Bacteria; k__norank_d__Bacteria; p__Firmicutes; c__Clostridia; o__Peptostreptococcales-Tissierellales; f__Anaerovoracaceae; g__Family_XIII_AD3011_group; s__unclassified_g__Family_XIII_AD3011_group; OTU35	8.55981e-05	4.27991e-05	4.27991e-05	0	0	0	0	0	4.27991e-05	0	0	0	0	4.27991e-05	0	0	0	0.000171196	0.479675		0	4.27991e-05
d__Bacteria; k__norank_d__Bacteria; p__Bacteroidota; c__Bacteroidia; o__Bacteroidales; f__Tannerellaceae; g__Parabacteroides; s__unclassified_g__Parabacteroides; OTU129	0	0	0.000385192	0	0	0	0	8.55981e-05	0	0	0	0	0	0	0	0	0	0	0.586071		0	0
d__Bacteria; k__norank_d__Bacteria; p__Firmicutes; c__Bacilli; o__Thermoactinomycetales; f__Thermoactinomycetaceae; g__Thermoactinomyces; s__Thermoactinomyces_khenchelensis; OTU709	0	0	0	0	0	0	4.27991e-05	0	0	0	0.000299593	0	0	0	0	0	0	0	0.120314		0.000128397	0
d__Bacteria; k__norank_d__Bacteria; p__Actinobacteriota; c__Actinobacteria; o__Micrococcales; f__Micrococcaceae; g__Glutamicibacter; s__Glutamicibacter_arilaitensis; OTU723	0	0	0	0	0	0	0	0	0	0	0.000171196	0	0	0	0	0	0	0	0.367879		0.000299593	0
d__Bacteria; k__norank_d__Bacteria; p__Firmicutes; c__Clostridia; o__Peptococcales; f__Peptococcaceae; g__norank_f__Peptococcaceae; s__unclassified_g__norank_f__Peptococcaceae; OTU255	0	0	8.55981e-05	8.55981e-05	0	0	4.27991e-05	8.55981e-05	4.27991e-05	0	0	0	0	4.27991e-05	8.55981e-05	0	0	0	0.909878		0	0
d__Bacteria; k__norank_d__Bacteria; p__Actinobacteriota; c__Actinobacteria; o__Corynebacteriales; f__Dietziaceae; g__Dietzia; s__Dietzia_lutea; OTU720	0	0	0	0	0	0	0	0	0	0	0.000171196	0	0	0	0	0	0	0	0.367879		0.000299593	0
d__Bacteria; k__norank_d__Bacteria; p__Firmicutes; c__Clostridia; o__Peptostreptococcales-Tissierellales; f__Anaerovoracaceae; g__Family_XIII_AD3011_group; s__uncultured_bacterium_g__Family_XIII_AD3011_group; OTU424	8.55981e-05	0	8.55981e-05	4.27991e-05	4.27991e-05	4.27991e-05	0	0	4.27991e-05	0	0	0	0	0	0	4.27991e-05	4.27991e-05	4.27991e-05	0.0471164		0	0
d__Bacteria; k__norank_d__Bacteria; p__Actinobacteriota; c__Actinobacteria; o__Micrococcales; f__Micrococcaceae; g__Enteractinococcus; s__Enteractinococcus_viverrae; OTU742	0	0	0	0	0	0	0	0	0	0	0.000256794	0	0	0	0	0	0	0	0.367879		0.000213995	0
d__Bacteria; k__norank_d__Bacteria; p__Bacteroidota; c__Bacteroidia; o__Bacteroidales; f__Muribaculaceae; g__norank_f__Muribaculaceae; s__uncultured_Bacteroidales_bacterium_g__norank_f__Muribaculaceae; OTU142	0	0	0.000385192	0	0	0	0	0	0	0	0	4.27991e-05	0	0	0	0	0	0	0.586071		0	0
d__Bacteria; k__norank_d__Bacteria; p__Proteobacteria; c__Alphaproteobacteria; o__Rhodospirillales; f__norank_o__Rhodospirillales; g__norank_f__norank_o__Rhodospirillales; s__unclassified_g__norank_f__norank_o__Rhodospirillales; OTU384	0	0	0.000213995	0	4.27991e-05	0	0	0	0	0	0	0	0	0	0	0	0.000171196	0	0.325547		0	0
d__Bacteria; k__norank_d__Bacteria; p__Bacteroidota; c__Bacteroidia; o__Bacteroidales; f__Prevotellaceae; g__Alloprevotella; s__uncultured_Bacteroidales_bacterium_g__Alloprevotella; OTU269	0	0	4.27991e-05	0	4.27991e-05	0	0	0	0	0	0	0	0	8.55981e-05	4.27991e-05	0.000128397	0	8.55981e-05	0.0393794		0	0
d__Bacteria; k__norank_d__Bacteria; p__Firmicutes; c__Bacilli; o__Bacillales; f__Planococcaceae; g__Sporosarcina; s__Sporosarcina_thermotolerans_g__Sporosarcina; OTU829	0	0	0	0	0	0	0	0	0	0	0.000171196	0	0	0	0	0	0	0	0.367879		0.000256794	0
d__Bacteria; k__norank_d__Bacteria; p__unclassified_k__norank_d__Bacteria; c__unclassified_k__norank_d__Bacteria; o__unclassified_k__norank_d__Bacteria; f__unclassified_k__norank_d__Bacteria; g__unclassified_k__norank_d__Bacteria; s__unclassified_k__norank_d__Bacteria; OTU131	0	0	0.000427991	0	0	0	0	0	0	0	0	0	0	0	0	0	0	0	0.367879		0	0
d__Bacteria; k__norank_d__Bacteria; p__Firmicutes; c__Clostridia; o__Oscillospirales; f__Ruminococcaceae; g__norank_f__Ruminococcaceae; s__unclassified_g__norank_f__Ruminococcaceae; OTU11	0.000385192	4.27991e-05	0	0	0	0	0	0	0	0	0	0	0	0	0	0	0	0	0.120314		0	0
d__Bacteria; k__norank_d__Bacteria; p__Actinobacteriota; c__Coriobacteriia; o__Coriobacteriales; f__Eggerthellaceae; g__unclassified_f__Eggerthellaceae; s__unclassified_f__Eggerthellaceae; OTU558	0	0	0	0	0	0	0.000385192	0	0	4.27991e-05	0	0	0	0	0	0	0	0	0.120314		0	0
d__Bacteria; k__norank_d__Bacteria; p__Firmicutes; c__Clostridia; o__Oscillospirales; f__Oscillospiraceae; g__UCG-005; s__uncultured_Clostridiales_bacterium_g__UCG-005; OTU180	0	8.55981e-05	0	4.27991e-05	8.55981e-05	0	0	0	0	0	0	0	0	0	0	8.55981e-05	8.55981e-05	4.27991e-05	0.12885		0	0
d__Bacteria; k__norank_d__Bacteria; p__Firmicutes; c__Clostridia; o__Oscillospirales; f__Ruminococcaceae; g__norank_f__Ruminococcaceae; s__Acutalibacter_muris; OTU177	0	0	0	0	0.000213995	0	0	0	0	0	0	0	0	0	0.000213995	0	0	0	0.58787		0	0
d__Bacteria; k__norank_d__Bacteria; p__Firmicutes; c__Clostridia; o__Oscillospirales; f__Ruminococcaceae; g__Eubacterium_siraeum_group; s__uncultured_bacterium_g__Eubacterium_siraeum_group; OTU688	0	0	8.55981e-05	0	0	0	8.55981e-05	0	0	0.000128397	0	0.000128397	0	0	0	0	0	0	0.10005		0	0
d__Bacteria; k__norank_d__Bacteria; p__Bacteroidota; c__Bacteroidia; o__Bacteroidales; f__Muribaculaceae; g__norank_f__Muribaculaceae; s__unclassified_g__norank_f__Muribaculaceae; OTU778	0	0	0	0	0	0	4.27991e-05	0	0	4.27991e-05	0	0.000342392	0	0	0	0	0	0	0.0342181		0	0
d__Bacteria; k__norank_d__Bacteria; p__Firmicutes; c__Clostridia; o__Clostridia_vadinBB60_group; f__norank_o__Clostridia_vadinBB60_group; g__norank_f__norank_o__Clostridia_vadinBB60_group; s__unclassified_g__norank_f__norank_o__Clostridia_vadinBB60_group; OTU284	0	0	0	0	8.55981e-05	0	0	0	0	0	0	0	0	0.000213995	0	4.27991e-05	8.55981e-05	0	0.12397		0	0
d__Bacteria; k__norank_d__Bacteria; p__unclassified_k__norank_d__Bacteria; c__unclassified_k__norank_d__Bacteria; o__unclassified_k__norank_d__Bacteria; f__unclassified_k__norank_d__Bacteria; g__unclassified_k__norank_d__Bacteria; s__unclassified_k__norank_d__Bacteria; OTU224	4.27991e-05	0.000128397	0	0.000213995	0	4.27991e-05	0	0	0	0	0	0	0	0	0	0	0	0	0.00846403		0	0
d__Bacteria; k__norank_d__Bacteria; p__Firmicutes; c__Clostridia; o__Peptostreptococcales-Tissierellales; f__Anaerovoracaceae; g__Anaerovorax; s__uncultured_bacterium_g__Anaerovorax; OTU167	4.27991e-05	0	0.000128397	0	4.27991e-05	0	0	0	0	4.27991e-05	0	0	0	4.27991e-05	0	0	8.55981e-05	0	0.448429		0	0
d__Bacteria; k__norank_d__Bacteria; p__Proteobacteria; c__Alphaproteobacteria; o__Rhodobacterales; f__Rhodobacteraceae; g__Gemmobacter; s__unclassified_g__Gemmobacter; OTU786	0	0	0	0	0	0	0	0	0	0	4.27991e-05	0	0	0	0	0	0	0	0.367879		0.000342392	0
d__Bacteria; k__norank_d__Bacteria; p__Firmicutes; c__Bacilli; o__RF39; f__norank_o__RF39; g__norank_f__norank_o__RF39; s__uncultured_bacterium_g__norank_f__norank_o__RF39; OTU17	0.000299593	4.27991e-05	0	0	0	4.27991e-05	0	0	0	0	0	0	0	0	0	0	0	0	0.0342181		0	0
d__Bacteria; k__norank_d__Bacteria; p__Proteobacteria; c__Alphaproteobacteria; o__Rhodobacterales; f__Rhodobacteraceae; g__Gemmobacter; s__uncultured_bacterium_g__Gemmobacter; OTU836	0	0	0	0	0	0	0	0	0	0	8.55981e-05	0	0	0	0	0	0	0	0.367879		0.000299593	0
d__Bacteria; k__norank_d__Bacteria; p__Firmicutes; c__Clostridia; o__Lachnospirales; f__Lachnospiraceae; g__norank_f__Lachnospiraceae; s__unclassified_g__norank_f__Lachnospiraceae; OTU121	0	0	0.000171196	4.27991e-05	0	0	0	0	0	0	0	0	0	0	0	4.27991e-05	0.000128397	0	0.302479		0	0
d__Bacteria; k__norank_d__Bacteria; p__Firmicutes; c__Clostridia; o__Lachnospirales; f__Lachnospiraceae; g__Lachnospiraceae_NK4A136_group; s__uncultured_bacterium_g__Lachnospiraceae_NK4A136_group; OTU140	0	0	0.000213995	0.000128397	0	0	0	0	0	4.27991e-05	0	0	0	0	0	0	0	0	0.283428		0	0
d__Bacteria; k__norank_d__Bacteria; p__Bacteroidota; c__Bacteroidia; o__Sphingobacteriales; f__Sphingobacteriaceae; g__Sphingobacterium; s__Sphingobacterium_mizutaii; OTU799	0	0	0	0	0	0	0	0	0	0	4.27991e-05	0	0	0	0	0	0	0	0.367879		0.000342392	0
d__Bacteria; k__norank_d__Bacteria; p__Firmicutes; c__Clostridia; o__Oscillospirales; f__Ruminococcaceae; g__Negativibacillus; s__unclassified_g__Negativibacillus; OTU109	8.55981e-05	0.000128397	0.000171196	0	0	0	0	0	0	0	0	0	0	0	0	0	0	0	0.0345016		0	0
d__Bacteria; k__norank_d__Bacteria; p__Firmicutes; c__Bacilli; o__Bacillales; f__Bacillaceae; g__Bacillus; s__Bacillus_thermolactis; OTU794	0	0	0	0	0	0	0	0	0	0	0.000256794	0	0	0	0	0	0	0	0.367879		0.000128397	0
d__Bacteria; k__norank_d__Bacteria; p__Firmicutes; c__Clostridia; o__Lachnospirales; f__Lachnospiraceae; g__unclassified_f__Lachnospiraceae; s__unclassified_f__Lachnospiraceae; OTU380	0	0	0	0	0	0	0	0	0	0	0	0	0	0	0	0.000299593	4.27991e-05	0	0.120314		0	0
d__Bacteria; k__norank_d__Bacteria; p__Actinobacteriota; c__Coriobacteriia; o__Coriobacteriales; f__Eggerthellaceae; g__unclassified_f__Eggerthellaceae; s__unclassified_f__Eggerthellaceae; OTU676	0	0	0	0	0	0	0	0	0	0.000342392	0	0	0	0	0	0	0	0	0.367879		0	0
d__Bacteria; k__norank_d__Bacteria; p__Bacteroidota; c__Bacteroidia; o__Bacteroidales; f__Rikenellaceae; g__Rikenellaceae_RC9_gut_group; s__unclassified_g__Rikenellaceae_RC9_gut_group; OTU93	0	0.000299593	0	0	0	4.27991e-05	0	0	0	0	0	0	0	0	0	0	0	0	0.120314		0	0
d__Bacteria; k__norank_d__Bacteria; p__Firmicutes; c__Clostridia; o__Oscillospirales; f__Ruminococcaceae; g__norank_f__Ruminococcaceae; s__uncultured_bacterium_g__norank_f__Ruminococcaceae; OTU441	0	0	4.27991e-05	4.27991e-05	0	0	0	0	0	4.27991e-05	0	0	0	8.55981e-05	8.55981e-05	0	4.27991e-05	0	0.351469		0	0
d__Bacteria; k__norank_d__Bacteria; p__Bacteroidota; c__Bacteroidia; o__Bacteroidales; f__Prevotellaceae; g__unclassified_f__Prevotellaceae; s__unclassified_f__Prevotellaceae; OTU500	0	0	0	0	0	0	0	0	0	0	0	0	0.000128397	0	0	0	0	0.000171196	0.120314		0	4.27991e-05
d__Bacteria; k__norank_d__Bacteria; p__Bacteroidota; c__Bacteroidia; o__Bacteroidales; f__Muribaculaceae; g__norank_f__Muribaculaceae; s__uncultured_bacterium_g__norank_f__Muribaculaceae; OTU217	8.55981e-05	8.55981e-05	0	4.27991e-05	0	8.55981e-05	0	0	0	0	0	0	0	0	0	0	0	4.27991e-05	0.0242643		0	0
d__Bacteria; k__norank_d__Bacteria; p__Firmicutes; c__Clostridia; o__Clostridiales; f__Clostridiaceae; g__Clostridium_sensu_stricto_1; s__Clostridium_sp._ND2; OTU749	0	0	4.27991e-05	0	0	0	4.27991e-05	4.27991e-05	0	4.27991e-05	0	0.000128397	0	0	4.27991e-05	0	0	0	0.0988549		0	0
d__Bacteria; k__norank_d__Bacteria; p__Firmicutes; c__Clostridia; o__Oscillospirales; f__Oscillospiraceae; g__unclassified_f__Oscillospiraceae; s__unclassified_f__Oscillospiraceae; OTU99	0	4.27991e-05	8.55981e-05	0	8.55981e-05	4.27991e-05	0	0	0	0	0	0	0	0	4.27991e-05	0	4.27991e-05	0	0.046447		0	0
d__Bacteria; k__norank_d__Bacteria; p__Firmicutes; c__Clostridia; o__Clostridia_vadinBB60_group; f__norank_o__Clostridia_vadinBB60_group; g__norank_f__norank_o__Clostridia_vadinBB60_group; s__unclassified_g__norank_f__norank_o__Clostridia_vadinBB60_group; OTU390	0	0	0	0	0	0	0	0	0	0	0	0	0	0	0	4.27991e-05	0.000299593	0	0.120314		0	0
d__Bacteria; k__norank_d__Bacteria; p__Proteobacteria; c__Gammaproteobacteria; o__Pseudomonadales; f__Pseudomonadaceae; g__Pseudomonas; s__Pseudomonas_aeruginosa_g__Pseudomonas; OTU792	4.27991e-05	0	0	0	0	0	0	4.27991e-05	0	0	0.000213995	0	0	0	0	0	0	0	0.303926		4.27991e-05	0
d__Bacteria; k__norank_d__Bacteria; p__Firmicutes; c__Clostridia; o__Oscillospirales; f__Ruminococcaceae; g__UBA1819; s__uncultured_bacterium_g__UBA1819; OTU552	0	0	4.27991e-05	0	0	0	0.000128397	0.000171196	0	0	0	0	0	0	0	0	0	0	0.283428		0	0
d__Bacteria; k__norank_d__Bacteria; p__unclassified_k__norank_d__Bacteria; c__unclassified_k__norank_d__Bacteria; o__unclassified_k__norank_d__Bacteria; f__unclassified_k__norank_d__Bacteria; g__unclassified_k__norank_d__Bacteria; s__unclassified_k__norank_d__Bacteria; OTU549	0	4.27991e-05	0	0	0	0	0.000128397	4.27991e-05	0	0	0	0	0	0	4.27991e-05	0	0	4.27991e-05	0.728574		0	0
d__Bacteria; k__norank_d__Bacteria; p__Actinobacteriota; c__Actinobacteria; o__Corynebacteriales; f__Corynebacteriaceae; g__Corynebacterium; s__Corynebacterium_mastitidis; OTU701	0	0	0	0	4.27991e-05	0	0	0	0	0	0.000213995	0	0	0	0	0	0	0	0.586071		4.27991e-05	0
d__Bacteria; k__norank_d__Bacteria; p__Proteobacteria; c__Alphaproteobacteria; o__Rhodospirillales; f__norank_o__Rhodospirillales; g__norank_f__norank_o__Rhodospirillales; s__gut_metagenome_g__norank; OTU477	0	0	0	0	0	0	0	0	0	0	0	0	0	0	0	0	0	0.000171196	0.367879		0	0.000128397
d__Bacteria; k__norank_d__Bacteria; p__Firmicutes; c__Clostridia; o__Oscillospirales; f__unclassified_o__Oscillospirales; g__unclassified_o__Oscillospirales; s__unclassified_o__Oscillospirales; OTU392	0	0	4.27991e-05	0	0	0	0	0	0	0	0	0	8.55981e-05	0	0	0	0.000171196	0	0.283428		0	0
d__Bacteria; k__norank_d__Bacteria; p__Bacteroidota; c__Bacteroidia; o__Bacteroidales; f__Rikenellaceae; g__Alistipes; s__unclassified_g__Alistipes; OTU493	0	0	8.55981e-05	0	4.27991e-05	0	0	0	4.27991e-05	0	0	0	0	8.55981e-05	0	0	0	4.27991e-05	0.706746		0	0
d__Bacteria; k__norank_d__Bacteria; p__Firmicutes; c__Clostridia; o__Lachnospirales; f__Lachnospiraceae; g__unclassified_f__Lachnospiraceae; s__unclassified_f__Lachnospiraceae; OTU445	0	0	0	0	0	0	0	0	0	0	0	0	0	0	4.27991e-05	0	0.000256794	0	0.120314		0	0
d__Bacteria; k__norank_d__Bacteria; p__Bacteroidota; c__Bacteroidia; o__Bacteroidales; f__Muribaculaceae; g__norank_f__Muribaculaceae; s__uncultured_bacterium_g__norank_f__Muribaculaceae; OTU378	0	0	0.000128397	0	0	0	0	0	0	0	0	0	0	0	0	4.27991e-05	0.000128397	0	0.344393		0	0
d__Bacteria; k__norank_d__Bacteria; p__Firmicutes; c__Clostridia; o__Clostridia_vadinBB60_group; f__norank_o__Clostridia_vadinBB60_group; g__norank_f__norank_o__Clostridia_vadinBB60_group; s__unclassified_g__norank_f__norank_o__Clostridia_vadinBB60_group; OTU189	0	0	0	0	4.27991e-05	0	0	0	0	0	0	0	0	0	8.55981e-05	8.55981e-05	8.55981e-05	0	0.0884781		0	0
d__Bacteria; k__norank_d__Bacteria; p__Firmicutes; c__Clostridia; o__Clostridia_vadinBB60_group; f__norank_o__Clostridia_vadinBB60_group; g__norank_f__norank_o__Clostridia_vadinBB60_group; s__uncultured_bacterium_g__norank_f__norank_o__Clostridia_vadinBB60_group; OTU373	0	0	0	0	0	0	0	0	0	0	0	0	0	8.55981e-05	0	4.27991e-05	0.000171196	0	0.0345016		0	0
d__Bacteria; k__norank_d__Bacteria; p__Bacteroidota; c__Bacteroidia; o__Bacteroidales; f__Muribaculaceae; g__norank_f__Muribaculaceae; s__uncultured_bacterium_g__norank_f__Muribaculaceae; OTU514	0	0	0	0	0	0	0	4.27991e-05	0	0	0	0	4.27991e-05	0	0	0	0	0.000128397	0.303926		0	8.55981e-05
d__Bacteria; k__norank_d__Bacteria; p__Firmicutes; c__Bacilli; o__Lactobacillales; f__Streptococcaceae; g__Streptococcus; s__unclassified_g__Streptococcus; OTU314	0	0	0	0	0	0	0	0	0	0	0	0	0	0	0.000299593	0	0	0	0.367879		0	0
d__Bacteria; k__norank_d__Bacteria; p__Proteobacteria; c__Gammaproteobacteria; o__Burkholderiales; f__Sutterellaceae; g__Parasutterella; s__Parasutterella_excrementihominis; OTU110	0	0	0.000171196	0	0	4.27991e-05	0	0	0	0	0	0	0	0	0	0	0	8.55981e-05	0.325547		0	0
d__Bacteria; k__norank_d__Bacteria; p__Thermotogota; c__Thermotogae; o__Petrotogales; f__Petrotogaceae; g__Defluviitoga; s__uncultured_bacterium_g__Defluviitoga; OTU784	0	0	0	0	0	0	0	0	0	0	0.000213995	0	0	0	0	0	0	0	0.367879		8.55981e-05	0
d__Bacteria; k__norank_d__Bacteria; p__Bacteroidota; c__Bacteroidia; o__Bacteroidales; f__Prevotellaceae; g__Alloprevotella; s__uncultured_Bacteroidales_bacterium_g__Alloprevotella; OTU612	0	0	0	0	0	0	0	0	0.000128397	0	0	0	0	4.27991e-05	0	0	0	8.55981e-05	0.363706		0	4.27991e-05
d__Bacteria; k__norank_d__Bacteria; p__unclassified_k__norank_d__Bacteria; c__unclassified_k__norank_d__Bacteria; o__unclassified_k__norank_d__Bacteria; f__unclassified_k__norank_d__Bacteria; g__unclassified_k__norank_d__Bacteria; s__unclassified_k__norank_d__Bacteria; OTU567	0	0	0	0	0	0	0	0.000128397	0	0.000171196	0	0	0	0	0	0	0	0	0.120314		0	0
d__Bacteria; k__norank_d__Bacteria; p__Bacteroidota; c__Bacteroidia; o__Bacteroidales; f__Muribaculaceae; g__norank_f__Muribaculaceae; s__uncultured_bacterium_g__norank_f__Muribaculaceae; OTU640	0	4.27991e-05	8.55981e-05	0	0	4.27991e-05	0	0	8.55981e-05	0	0	0	0	0	0	0	0	0	0.149024		0	4.27991e-05
d__Bacteria; k__norank_d__Bacteria; p__Desulfobacterota; c__Desulfovibrionia; o__Desulfovibrionales; f__Desulfovibrionaceae; g__Desulfovibrio; s__uncultured_bacterium_g__Desulfovibrio; OTU545	0	0	0	0	0	0	4.27991e-05	0	0	4.27991e-05	0	0.000213995	0	0	0	0	0	0	0.0342181		0	0
d__Bacteria; k__norank_d__Bacteria; p__Firmicutes; c__Clostridia; o__Peptostreptococcales-Tissierellales; f__Peptostreptococcaceae; g__Clostridioides; s__Clostridioides_difficile_g__Clostridioides; OTU662	0	0	0	0	0	0	0.000171196	0	0	4.27991e-05	0	8.55981e-05	0	0	0	0	0	0	0.0345016		0	0
d__Bacteria; k__norank_d__Bacteria; p__Proteobacteria; c__Gammaproteobacteria; o__Burkholderiales; f__Alcaligenaceae; g__Paenalcaligenes; s__uncultured_bacterium_g__Paenalcaligenes; OTU718	0	0	0	0	0	0	0	0	0	0	0.000299593	0	0	0	0	0	0	0	0.367879		0	0
d__Bacteria; k__norank_d__Bacteria; p__Firmicutes; c__Bacilli; o__Erysipelotrichales; f__Erysipelotrichaceae; g__norank_f__Erysipelotrichaceae; s__uncultured_bacterium_g__norank_f__Erysipelotrichaceae; OTU358	0	0	0	0	0	0	0	0	0	0	0	0	0.000128397	4.27991e-05	0	0	0	0	0.120314		0	0.000128397
d__Bacteria; k__norank_d__Bacteria; p__Firmicutes; c__Clostridia; o__Clostridia_vadinBB60_group; f__norank_o__Clostridia_vadinBB60_group; g__norank_f__norank_o__Clostridia_vadinBB60_group; s__uncultured_bacterium_g__norank_f__norank_o__Clostridia_vadinBB60_group; OTU374	0	0	0	0	0	4.27991e-05	0	0	0	0	0	4.27991e-05	0	0	0.000128397	0	4.27991e-05	0	0.664757		0	0
d__Bacteria; k__norank_d__Bacteria; p__Proteobacteria; c__Alphaproteobacteria; o__Rhizobiales; f__Rhizobiaceae; g__Aminobacter; s__uncultured_bacterium_g__Aminobacter; OTU817	0	0	0	0	0	0	0	0	0	0	0	0	0	0	0	0	0	0	1		0.000256794	0
d__Bacteria; k__norank_d__Bacteria; p__Proteobacteria; c__Gammaproteobacteria; o__Burkholderiales; f__Comamonadaceae; g__Comamonas; s__unclassified_g__Comamonas; OTU824	0	0	0	0	0	0	0	0	0	0	8.55981e-05	0	0	0	0	0	0	0	0.367879		0.000171196	0
d__Bacteria; k__norank_d__Bacteria; p__Bacteroidota; c__Bacteroidia; o__Bacteroidales; f__Muribaculaceae; g__norank_f__Muribaculaceae; s__uncultured_bacterium_g__norank_f__Muribaculaceae; OTU504	0	0	0	0	0	0	0	0	0	0	0	0	8.55981e-05	0	0	0	0	8.55981e-05	0.119433		0	8.55981e-05
d__Bacteria; k__norank_d__Bacteria; p__Bacteroidota; c__Bacteroidia; o__Bacteroidales; f__Marinifilaceae; g__Odoribacter; s__uncultured_bacterium_g__Odoribacter; OTU598	0	0	0	0	0	0	0	0.000256794	0	0	0	0	0	0	0	0	0	0	0.367879		0	0
d__Bacteria; k__norank_d__Bacteria; p__Cyanobacteria; c__Vampirivibrionia; o__Gastranaerophilales; f__norank_o__Gastranaerophilales; g__norank_f__norank_o__Gastranaerophilales; s__uncultured_bacterium_g__norank_f__norank_o__Gastranaerophilales; OTU517	0	0	0	0	0	0	0	0	0	0	0	0	0.000256794	0	0	0	0	0	0.367879		0	0
d__Bacteria; k__norank_d__Bacteria; p__Bacteroidota; c__Bacteroidia; o__Bacteroidales; f__Muribaculaceae; g__norank_f__Muribaculaceae; s__uncultured_bacterium_g__norank_f__Muribaculaceae; OTU580	0	0	0	0	0	0	0	0.000213995	0	4.27991e-05	0	0	0	0	0	0	0	0	0.120314		0	0
d__Bacteria; k__norank_d__Bacteria; p__Proteobacteria; c__Alphaproteobacteria; o__Rickettsiales; f__Mitochondria; g__norank_f__Mitochondria; s__unclassified_g__norank_f__Mitochondria; OTU736	0	0	0	0	0	0	0	4.27991e-05	0	0	0.000213995	0	0	0	0	0	0	0	0.120314		0	0
d__Bacteria; k__norank_d__Bacteria; p__Firmicutes; c__Clostridia; o__Oscillospirales; f__Oscillospiraceae; g__unclassified_f__Oscillospiraceae; s__unclassified_f__Oscillospiraceae; OTU353	4.27991e-05	0	0	0	0	0	4.27991e-05	0	0	0	0	0	0	4.27991e-05	4.27991e-05	8.55981e-05	0	0	0.29905		0	0
d__Bacteria; k__norank_d__Bacteria; p__Firmicutes; c__Bacilli; o__Erysipelotrichales; f__Erysipelotrichaceae; g__unclassified_f__Erysipelotrichaceae; s__unclassified_f__Erysipelotrichaceae; OTU590	8.55981e-05	4.27991e-05	0	0	0	0	0	0.000128397	0	0	0	0	0	0	0	0	0	0	0.363706		0	0
d__Bacteria; k__norank_d__Bacteria; p__Firmicutes; c__Bacilli; o__Bacillales; f__Planococcaceae; g__Sporosarcina; s__unclassified_g__Sporosarcina; OTU827	0	0	0	0	0	0	0	0	0	0	0.000213995	0	0	0	0	0	0	0	0.367879		4.27991e-05	0
d__Bacteria; k__norank_d__Bacteria; p__Proteobacteria; c__Alphaproteobacteria; o__Rhizobiales; f__Rhizobiaceae; g__unclassified_f__Rhizobiaceae; s__unclassified_f__Rhizobiaceae; OTU554	0	0	0	0	0	0	0.000256794	0	0	0	0	0	0	0	0	0	0	0	0.367879		0	0
d__Bacteria; k__norank_d__Bacteria; p__Firmicutes; c__Clostridia; o__Lachnospirales; f__Lachnospiraceae; g__unclassified_f__Lachnospiraceae; s__unclassified_f__Lachnospiraceae; OTU134	0	0	4.27991e-05	0	0	0	4.27991e-05	0	0	0	0	0	0	4.27991e-05	0.000128397	0	0	0	0.664757		0	0
d__Bacteria; k__norank_d__Bacteria; p__Firmicutes; c__Bacilli; o__Bacillales; f__Bacillaceae; g__Pseudogracilibacillus; s__Pseudogracilibacillus_auburnensis; OTU710	0	0	0	0	0	0	0	0	0	0	0.000256794	0	0	0	0	0	0	0	0.367879		0	0
d__Bacteria; k__norank_d__Bacteria; p__Proteobacteria; c__Alphaproteobacteria; o__Rhizobiales; f__Rhizobiaceae; g__Ochrobactrum; s__Ochrobactrum_pseudogrignonense_g__Ochrobactrum; OTU695	0	0	0	0	0	0	0	0	0	0	8.55981e-05	0	0	0	0	0	0	0	0.367879		0.000171196	0
d__Bacteria; k__norank_d__Bacteria; p__Firmicutes; c__Clostridia; o__Clostridia_UCG-014; f__norank_o__Clostridia_UCG-014; g__norank_f__norank_o__Clostridia_UCG-014; s__uncultured_bacterium_g__norank_f__norank_o__Clostridia_UCG-014; OTU153	0	0	0	0.000171196	0	0	0	8.55981e-05	0	0	0	0	0	0	0	0	0	0	0.586071		0	0
d__Bacteria; k__norank_d__Bacteria; p__Firmicutes; c__Bacilli; o__Lactobacillales; f__Lactobacillaceae; g__Lactobacillus; s__Lactobacillus_apodemi; OTU141	0	0	4.27991e-05	0	0	0	4.27991e-05	0	0	0.000171196	0	0	0	0	0	0	0	0	0.303926		0	0
d__Bacteria; k__norank_d__Bacteria; p__Firmicutes; c__Clostridia; o__Oscillospirales; f__norank_o__Oscillospirales; g__norank_f__norank_o__Oscillospirales; s__metagenome_g__norank_f__norank_o__Oscillospirales; OTU293	0	0	0	0	0	0	0	0	0	0	0	0	0	4.27991e-05	8.55981e-05	0	4.27991e-05	0	0.0342181		0	8.55981e-05
d__Bacteria; k__norank_d__Bacteria; p__Proteobacteria; c__Gammaproteobacteria; o__Pseudomonadales; f__Pseudomonadaceae; g__Pseudomonas; s__Pseudomonas_stutzeri_DSM_10701; OTU787	0	0	0	0	0	0	0	0	0	0	4.27991e-05	0	0	0	0	0	0	0	0.367879		0.000213995	0
d__Bacteria; k__norank_d__Bacteria; p__Firmicutes; c__Clostridia; o__Lachnospirales; f__Lachnospiraceae; g__Anaerocolumna; s__uncultured_bacterium_g__Anaerocolumna; OTU708	0	0	0	0	0	0	0	0	0	0	0.000256794	0	0	0	0	0	0	0	0.367879		0	0
d__Bacteria; k__norank_d__Bacteria; p__Firmicutes; c__Bacilli; o__Bacillales; f__Bacillaceae; g__Virgibacillus; s__uncultured_bacterium_g__Virgibacillus; OTU728	0	0	0	0	0	0	0	0	0	0	0.000256794	0	0	0	0	0	0	0	0.367879		0	0
d__Bacteria; k__norank_d__Bacteria; p__Bacteroidota; c__Bacteroidia; o__Bacteroidales; f__Muribaculaceae; g__norank_f__Muribaculaceae; s__unclassified_g__norank_f__Muribaculaceae; OTU341	0	0	0	0	0	0	0	0	0	0	0	0	0	0	0	0.000213995	0	0	0.367879		0	0
d__Bacteria; k__norank_d__Bacteria; p__Bacteroidota; c__Bacteroidia; o__Bacteroidales; f__Muribaculaceae; g__norank_f__Muribaculaceae; s__uncultured_bacterium_g__norank_f__Muribaculaceae; OTU227	4.27991e-05	4.27991e-05	0	0	0	4.27991e-05	0	0	0	0	0	0	0	0	0	0	4.27991e-05	0	0.119433		0	4.27991e-05
d__Bacteria; k__norank_d__Bacteria; p__Bacteroidota; c__Bacteroidia; o__Bacteroidales; f__Muribaculaceae; g__norank_f__Muribaculaceae; s__unclassified_g__norank_f__Muribaculaceae; OTU780	0	0	0	0	0	0	0	0	0	0	0	0.000213995	0	0	0	0	0	0	0.367879		0	0
d__Bacteria; k__norank_d__Bacteria; p__Proteobacteria; c__Alphaproteobacteria; o__Rhizobiales; f__Devosiaceae; g__Devosia; s__uncultured_bacterium_g__Devosia; OTU790	0	0	0	0	0	0	0	0	0	0	4.27991e-05	0	0	0	0	0	0	0	0.367879		0.000171196	0
d__Bacteria; k__norank_d__Bacteria; p__unclassified_k__norank_d__Bacteria; c__unclassified_k__norank_d__Bacteria; o__unclassified_k__norank_d__Bacteria; f__unclassified_k__norank_d__Bacteria; g__unclassified_k__norank_d__Bacteria; s__unclassified_k__norank_d__Bacteria; OTU67	0	0.000171196	0	4.27991e-05	0	0	0	0	0	0	0	0	0	0	0	0	0	0	0.120314		0	0
d__Bacteria; k__norank_d__Bacteria; p__Firmicutes; c__Bacilli; o__Bacillales; f__Bacillaceae; g__Bacillus; s__unclassified_g__Bacillus; OTU727	0	0	0	0	0	0	0	0	0	0	0.000171196	0	0	0	0	0	0	0	0.367879		4.27991e-05	0
d__Bacteria; k__norank_d__Bacteria; p__Firmicutes; c__Clostridia; o__Clostridia_UCG-014; f__norank_o__Clostridia_UCG-014; g__norank_f__norank_o__Clostridia_UCG-014; s__unclassified_g__norank_f__norank_o__Clostridia_UCG-014; OTU530	0	0	0	0	0	0	8.55981e-05	4.27991e-05	0	4.27991e-05	0	4.27991e-05	0	0	0	0	0	0	0.00822975		0	0
d__Bacteria; k__norank_d__Bacteria; p__Firmicutes; c__Clostridia; o__Oscillospirales; f__unclassified_o__Oscillospirales; g__unclassified_o__Oscillospirales; s__unclassified_o__Oscillospirales; OTU482	0	0	0	0	0	4.27991e-05	0	0	0	0	0	0	4.27991e-05	0	0	0	0	8.55981e-05	0.303926		0	4.27991e-05
d__Bacteria; k__norank_d__Bacteria; p__Proteobacteria; c__Gammaproteobacteria; o__Pseudomonadales; f__Moraxellaceae; g__Acinetobacter; s__unclassified_g__Acinetobacter; OTU738	0	0	0	0	0	0	0	4.27991e-05	0	0	8.55981e-05	0	0	0	0	0	0	0	0.120314		8.55981e-05	0
d__Bacteria; k__norank_d__Bacteria; p__Firmicutes; c__Clostridia; o__Eubacteriales; f__Anaerofustaceae; g__Anaerofustis; s__unclassified_g__Anaerofustis; OTU473	0	0	0	4.27991e-05	0	0	0	0	0	0	0	4.27991e-05	0	0	0	0	0	0.000128397	0.989637		0	0
d__Bacteria; k__norank_d__Bacteria; p__Firmicutes; c__Clostridia; o__Christensenellales; f__Christensenellaceae; g__norank_f__Christensenellaceae; s__uncultured_bacterium_g__norank_f__Christensenellaceae; OTU61	0	4.27991e-05	0	0	0	4.27991e-05	0	0	0	0	0	4.27991e-05	0	0	0	0	8.55981e-05	0	0.802965		0	0
d__Bacteria; k__norank_d__Bacteria; p__unclassified_k__norank_d__Bacteria; c__unclassified_k__norank_d__Bacteria; o__unclassified_k__norank_d__Bacteria; f__unclassified_k__norank_d__Bacteria; g__unclassified_k__norank_d__Bacteria; s__unclassified_k__norank_d__Bacteria; OTU375	0	0	0	0	0	0	0	0	0	0	0	0	0	4.27991e-05	4.27991e-05	8.55981e-05	4.27991e-05	0	0.00822975		0	0
d__Bacteria; k__norank_d__Bacteria; p__Firmicutes; c__Bacilli; o__RF39; f__norank_o__RF39; g__norank_f__norank_o__RF39; s__unclassified_g__norank_f__norank_o__RF39; OTU49	0.000128397	0	8.55981e-05	0	0	0	0	0	0	0	0	0	0	0	0	0	0	0	0.120314		0	0
d__Bacteria; k__norank_d__Bacteria; p__Firmicutes; c__Clostridia; o__Oscillospirales; f__Clostridium_methylpentosum_group; g__norank_f__Clostridium_methylpentosum_group; s__uncultured_organism_g__norank_f__Clostridium_methylpentosum_group; OTU41	0.000128397	0	0	0	0	0	0	0	0	0	0	0	0	0	0	0	8.55981e-05	0	0.586071		0	0
d__Bacteria; k__norank_d__Bacteria; p__Bacteroidota; c__Bacteroidia; o__Bacteroidales; f__Muribaculaceae; g__norank_f__Muribaculaceae; s__uncultured_bacterium_g__norank_f__Muribaculaceae; OTU234	0	0	0	0	0	0	0	0	0	0	0	0	0.000128397	0	0	0	0	4.27991e-05	0.120314		0	4.27991e-05
d__Bacteria; k__norank_d__Bacteria; p__Firmicutes; c__Bacilli; o__Bacillales; f__Bacillaceae; g__Bacillus; s__Bacillus_anthracis_g__Bacillus; OTU700	0	0	0	0	0	0	0	0	0	0	0.000213995	0	0	0	0	0	0	0	0.367879		0	0
d__Bacteria; k__norank_d__Bacteria; p__Firmicutes; c__Clostridia; o__Lachnospirales; f__Lachnospiraceae; g__Eisenbergiella; s__uncultured_bacterium_g__Eisenbergiella; OTU608	0	0	0	0	0	0	0	4.27991e-05	0	8.55981e-05	0	4.27991e-05	0	0	0	0	0	0	0.0342181		0	0
d__Bacteria; k__norank_d__Bacteria; p__Firmicutes; c__Clostridia; o__norank_c__Clostridia; f__Hungateiclostridiaceae; g__Ruminiclostridium; s__uncultured_bacterium_g__Ruminiclostridium; OTU130	4.27991e-05	0	0.000128397	0	0	0	0	0	0	0	0	0	0	0	0	0	0	0	0.120314		0	0
d__Bacteria; k__norank_d__Bacteria; p__Cyanobacteria; c__Vampirivibrionia; o__Gastranaerophilales; f__norank_o__Gastranaerophilales; g__norank_f__norank_o__Gastranaerophilales; s__uncultured_bacterium_g__norank_f__norank_o__Gastranaerophilales; OTU660	0	0	0	0	0	0	4.27991e-05	0	0	0.000128397	0	0	0	0	0	0	0	0	0.120314		0	0
d__Bacteria; k__norank_d__Bacteria; p__Firmicutes; c__Clostridia; o__Oscillospirales; f__Ruminococcaceae; g__unclassified_f__Ruminococcaceae; s__unclassified_f__Ruminococcaceae; OTU478	0	0	0	0	0	0	0	0	0	0	0	0	4.27991e-05	0	0	0	0	0.000128397	0.120314		0	0
d__Bacteria; k__norank_d__Bacteria; p__Bacteroidota; c__Bacteroidia; o__Bacteroidales; f__Prevotellaceae; g__unclassified_f__Prevotellaceae; s__unclassified_f__Prevotellaceae; OTU165	0	0	0	0	8.55981e-05	0	0	0	0	0	0	0	0	0	8.55981e-05	0	0	0	0.58787		0	0
d__Bacteria; k__norank_d__Bacteria; p__Firmicutes; c__Bacilli; o__Bacillales; f__Bacillaceae; g__Geobacillus; s__Parageobacillus_toebii; OTU693	0	0	0	0	0	0	8.55981e-05	0	0	0	8.55981e-05	0	0	0	0	0	0	0	0.119433		0	0
d__Bacteria; k__norank_d__Bacteria; p__Firmicutes; c__Clostridia; o__Christensenellales; f__Christensenellaceae; g__Christensenellaceae_R-7_group; s__unclassified_g__Christensenellaceae_R-7_group; OTU117	0	0	8.55981e-05	0	0	0	0	0	0	0	0	0	0	4.27991e-05	0	0	4.27991e-05	0	0.362805		0	0
d__Bacteria; k__norank_d__Bacteria; p__Firmicutes; c__Bacilli; o__Lactobacillales; f__Streptococcaceae; g__Streptococcus; s__Streptococcus_lutetiensis; OTU591	0	0	0	0	0	0	0	8.55981e-05	0	0	0	0	0	0	4.27991e-05	0	0	0	0.586071		4.27991e-05	0
d__Bacteria; k__norank_d__Bacteria; p__Bacteroidota; c__Bacteroidia; o__Bacteroidales; f__Prevotellaceae; g__Alloprevotella; s__uncultured_Bacteroidales_bacterium_g__Alloprevotella; OTU522	0	0	0	0	0	0	0	0	0	0	0	0	0	0	0	0	0	0	1		0	0.000171196
d__Bacteria; k__norank_d__Bacteria; p__Actinobacteriota; c__Actinobacteria; o__Micrococcales; f__Micrococcaceae; g__Rothia; s__Rothia_nasimurium; OTU526	0	0	0	0	0	0	8.55981e-05	0	0	4.27991e-05	4.27991e-05	0	0	0	0	0	0	0	0.0342181		0	0
d__Bacteria; k__norank_d__Bacteria; p__Bacteroidota; c__Bacteroidia; o__Bacteroidales; f__Prevotellaceae; g__Alloprevotella; s__gut_metagenome_g__Alloprevotella; OTU561	0	0	0	0	0	0	0	8.55981e-05	0	8.55981e-05	0	0	0	0	0	0	0	0	0.119433		0	0
d__Bacteria; k__norank_d__Bacteria; p__Bacteroidota; c__Bacteroidia; o__Bacteroidales; f__Muribaculaceae; g__norank_f__Muribaculaceae; s__uncultured_bacterium_g__norank_f__Muribaculaceae; OTU681	0	0	0	0	0	0	0	0	0	0.000171196	0	0	0	0	0	0	0	0	0.367879		0	0
d__Bacteria; k__norank_d__Bacteria; p__Firmicutes; c__Clostridia; o__Oscillospirales; f__Ruminococcaceae; g__unclassified_f__Ruminococcaceae; s__unclassified_f__Ruminococcaceae; OTU575	0	4.27991e-05	0	0	0	0	0	4.27991e-05	0	0	0	0	0	0	0	8.55981e-05	0	0	0.989637		0	0
d__Bacteria; k__norank_d__Bacteria; p__Firmicutes; c__Clostridia; o__unclassified_c__Clostridia; f__unclassified_c__Clostridia; g__unclassified_c__Clostridia; s__unclassified_c__Clostridia; OTU20	0.000128397	4.27991e-05	0	0	0	0	0	0	0	0	0	0	0	0	0	0	0	0	0.120314		0	0
d__Bacteria; k__norank_d__Bacteria; p__Firmicutes; c__Clostridia; o__Oscillospirales; f__Oscillospiraceae; g__UCG-005; s__unclassified_g__UCG-005; OTU793	0	0	0	0	4.27991e-05	0	0	4.27991e-05	0	0	4.27991e-05	0	0	0	0	0	0	0	0.321958		4.27991e-05	0
d__Bacteria; k__norank_d__Bacteria; p__Actinobacteriota; c__Actinobacteria; o__Corynebacteriales; f__Corynebacteriaceae; g__Corynebacterium; s__unclassified_g__Corynebacterium; OTU472	0	0	0	0	0	0	0	0	0	0	0.000128397	0	0	0	0	0	0	0	0.367879		4.27991e-05	0
d__Bacteria; k__norank_d__Bacteria; p__Firmicutes; c__Clostridia; o__Peptococcales; f__Peptococcaceae; g__Peptococcus; s__uncultured_organism_g__Peptococcus; OTU44	4.27991e-05	0	4.27991e-05	0	0	0	4.27991e-05	0	0	0	0	0	0	0	0	0	0	0	0.321958		0	4.27991e-05
d__Bacteria; k__norank_d__Bacteria; p__Firmicutes; c__Bacilli; o__Erysipelotrichales; f__Erysipelotrichaceae; g__unclassified_f__Erysipelotrichaceae; s__unclassified_f__Erysipelotrichaceae; OTU302	0	0	0	0	0	0	0	0	0	0	0	0	0	0	0.000171196	0	0	0	0.367879		0	0
d__Bacteria; k__norank_d__Bacteria; p__Firmicutes; c__Bacilli; o__Bacillales; f__Bacillaceae; g__Ureibacillus; s__Ureibacillus_thermosphaericus; OTU539	0	0	0	0	0	0	0	0	0	0	0.000171196	0	0	0	0	0	0	0	0.367879		0	0
d__Bacteria; k__norank_d__Bacteria; p__Bacteroidota; c__Bacteroidia; o__Bacteroidales; f__unclassified_o__Bacteroidales; g__unclassified_o__Bacteroidales; s__unclassified_o__Bacteroidales; OTU200	0	0	0	0	0	0.000128397	0	0	0	0	0	0	0	0	0	0	0	0	0.367879		0	4.27991e-05
d__Bacteria; k__norank_d__Bacteria; p__unclassified_k__norank_d__Bacteria; c__unclassified_k__norank_d__Bacteria; o__unclassified_k__norank_d__Bacteria; f__unclassified_k__norank_d__Bacteria; g__unclassified_k__norank_d__Bacteria; s__unclassified_k__norank_d__Bacteria; OTU680	0	0	0	0	0	0	0	0	0	0.000171196	0	0	0	0	0	0	0	0	0.367879		0	0
d__Bacteria; k__norank_d__Bacteria; p__Bacteroidota; c__Bacteroidia; o__Bacteroidales; f__Muribaculaceae; g__norank_f__Muribaculaceae; s__uncultured_bacterium_g__norank_f__Muribaculaceae; OTU763	0	0	0	0	0	0	0	8.55981e-05	0	4.27991e-05	0	4.27991e-05	0	0	0	0	0	0	0.0342181		0	0
d__Bacteria; k__norank_d__Bacteria; p__Firmicutes; c__Bacilli; o__Bacillales; f__Bacillaceae; g__Bacillus; s__unclassified_g__Bacillus; OTU703	0	0	0	0	0	0	0	0	0	0	0.000171196	0	0	0	0	0	0	0	0.367879		0	0
d__Bacteria; k__norank_d__Bacteria; p__Bacteroidota; c__Bacteroidia; o__Bacteroidales; f__Prevotellaceae; g__unclassified_f__Prevotellaceae; s__unclassified_f__Prevotellaceae; OTU498	0	0	0	0	0	0	0	0	0	0	0	0	0	0	0	0	0	4.27991e-05	0.367879		0	0.000128397
d__Bacteria; k__norank_d__Bacteria; p__Desulfobacterota; c__Desulfovibrionia; o__Desulfovibrionales; f__Desulfovibrionaceae; g__Desulfovibrio; s__unclassified_g__Desulfovibrio; OTU369	0	0	0	0	0	0	0	0	0	0	0	0	0	0	4.27991e-05	8.55981e-05	4.27991e-05	0	0.0342181		0	0
d__Bacteria; k__norank_d__Bacteria; p__Firmicutes; c__Clostridia; o__Oscillospirales; f__Ruminococcaceae; g__unclassified_f__Ruminococcaceae; s__unclassified_f__Ruminococcaceae; OTU199	0	0	8.55981e-05	0	4.27991e-05	0	0	0	0	0	0	0	0	0	0	0	4.27991e-05	0	0.303926		0	0
d__Bacteria; k__norank_d__Bacteria; p__Firmicutes; c__Bacilli; o__RF39; f__norank_o__RF39; g__norank_f__norank_o__RF39; s__unclassified_g__norank_f__norank_o__RF39; OTU572	0	0	0	0	0	0	0	0.000171196	0	0	0	0	0	0	0	0	0	0	0.367879		0	0
d__Bacteria; k__norank_d__Bacteria; p__Firmicutes; c__Bacilli; o__Lactobacillales; f__Lactobacillaceae; g__Lactobacillus; s__unclassified_g__Lactobacillus; OTU765	0	0	0	0	0	0	0	0	0	0	0	0.000171196	0	0	0	0	0	0	0.367879		0	0
d__Bacteria; k__norank_d__Bacteria; p__Proteobacteria; c__Alphaproteobacteria; o__Rhizobiales; f__Rhizobiaceae; g__Allorhizobium-Neorhizobium-Pararhizobium-Rhizobium; s__Allorhizobium_vitis; OTU744	0	0	0	0	0	0	0	0	0	0	8.55981e-05	0	0	0	0	0	0	0	0.367879		8.55981e-05	0
d__Bacteria; k__norank_d__Bacteria; p__Bacteroidota; c__Bacteroidia; o__Bacteroidales; f__Muribaculaceae; g__norank_f__Muribaculaceae; s__uncultured_bacterium_g__norank_f__Muribaculaceae; OTU118	0	0	0.000128397	0	0	0	0	0	0	0	0	0	0	0	0	0	0	0	0.367879		0	0
d__Bacteria; k__norank_d__Bacteria; p__Firmicutes; c__Clostridia; o__Clostridia_vadinBB60_group; f__norank_o__Clostridia_vadinBB60_group; g__norank_f__norank_o__Clostridia_vadinBB60_group; s__uncultured_bacterium_g__norank_f__norank_o__Clostridia_vadinBB60_group; OTU333	0	0	0	0	4.27991e-05	0	0	0	0	0	0	0	0	0	8.55981e-05	0	0	0	0.586071		0	0
d__Bacteria; k__norank_d__Bacteria; p__Firmicutes; c__Clostridia; o__Oscillospirales; f__Ruminococcaceae; g__Harryflintia; s__uncultured_bacterium_g__Harryflintia; OTU427	0	0	4.27991e-05	0	0	0	0	0	0	0	0	0	0	0	4.27991e-05	0	4.27991e-05	0	0.321958		0	0
d__Bacteria; k__norank_d__Bacteria; p__Bacteroidota; c__Bacteroidia; o__Bacteroidales; f__Prevotellaceae; g__Alloprevotella; s__unclassified_g__Alloprevotella; OTU623	0	0	0	0	0	0	0	0	8.55981e-05	0	0	0	0	0	0	0	0	0	0.367879		0	4.27991e-05
d__Bacteria; k__norank_d__Bacteria; p__Firmicutes; c__Clostridia; o__Oscillospirales; f__Ruminococcaceae; g__norank_f__Ruminococcaceae; s__uncultured_bacterium_g__norank_f__Ruminococcaceae; OTU242	0	0	0	0	0	0	0	0	0	0	0	0	8.55981e-05	0	0	0	0	0	0.367879		0	4.27991e-05
d__Bacteria; k__norank_d__Bacteria; p__Actinobacteriota; c__Actinobacteria; o__Corynebacteriales; f__Corynebacteriaceae; g__Corynebacterium; s__Corynebacterium_urealyticum; OTU764	0	0	0	0	0	0	0	0	0	0	0	0.000128397	0	0	0	0	0	0	0.367879		0	0
d__Bacteria; k__norank_d__Bacteria; p__Bacteroidota; c__Bacteroidia; o__Bacteroidales; f__Prevotellaceae; g__Alloprevotella; s__uncultured_bacterium_g__Alloprevotella; OTU605	0	0	0	0	0	0	0	4.27991e-05	0	8.55981e-05	0	0	0	0	0	0	0	0	0.120314		0	0
d__Bacteria; k__norank_d__Bacteria; p__Bacteroidota; c__Bacteroidia; o__Bacteroidales; f__Marinifilaceae; g__Butyricimonas; s__Butyricimonas_synergistica; OTU389	0	0	0	0	0	0	0	0	0	0	0	0	0	0	0	0	0.000128397	0	0.367879		0	0
d__Bacteria; k__norank_d__Bacteria; p__Firmicutes; c__Bacilli; o__RF39; f__norank_o__RF39; g__norank_f__norank_o__RF39; s__unclassified_g__norank_f__norank_o__RF39; OTU564	0	8.55981e-05	0	0	0	0	0	0	0	4.27991e-05	0	0	0	0	0	0	0	0	0.586071		0	0
d__Bacteria; k__norank_d__Bacteria; p__Firmicutes; c__Clostridia; o__Christensenellales; f__Christensenellaceae; g__norank_f__Christensenellaceae; s__Christensenella_sp._Marseille-P2437; OTU26	4.27991e-05	0	0	0	0	0	0	0	0	0	0	8.55981e-05	0	0	0	0	0	0	0.586071		0	0
d__Bacteria; k__norank_d__Bacteria; p__Firmicutes; c__Clostridia; o__Oscillospirales; f__Ruminococcaceae; g__Faecalibacterium; s__Faecalibacterium_prausnitzii; OTU588	0	0	0	0	0	4.27991e-05	0	8.55981e-05	0	0	0	0	0	0	0	0	0	0	0.586071		0	0
d__Bacteria; k__norank_d__Bacteria; p__unclassified_k__norank_d__Bacteria; c__unclassified_k__norank_d__Bacteria; o__unclassified_k__norank_d__Bacteria; f__unclassified_k__norank_d__Bacteria; g__unclassified_k__norank_d__Bacteria; s__unclassified_k__norank_d__Bacteria; OTU687	0	0	0	0	0	0	0	4.27991e-05	0	8.55981e-05	0	0	0	0	0	0	0	0	0.120314		0	0
d__Bacteria; k__norank_d__Bacteria; p__Firmicutes; c__Clostridia; o__Lachnospirales; f__Lachnospiraceae; g__Roseburia; s__unclassified_g__Roseburia; OTU60	0	0.000128397	0	0	0	0	0	0	0	0	0	0	0	0	0	0	0	0	0.367879		0	0
d__Bacteria; k__norank_d__Bacteria; p__unclassified_k__norank_d__Bacteria; c__unclassified_k__norank_d__Bacteria; o__unclassified_k__norank_d__Bacteria; f__unclassified_k__norank_d__Bacteria; g__unclassified_k__norank_d__Bacteria; s__unclassified_k__norank_d__Bacteria; OTU682	0	0	0	0	0	0	0	0	0	0.000128397	0	0	0	0	0	0	0	0	0.367879		0	0
d__Bacteria; k__norank_d__Bacteria; p__Firmicutes; c__Clostridia; o__Oscillospirales; f__Ruminococcaceae; g__unclassified_f__Ruminococcaceae; s__unclassified_f__Ruminococcaceae; OTU316	0	0	0	0	0	0	0	4.27991e-05	0	0	0	0	0	4.27991e-05	4.27991e-05	0	0	0	0.321958		0	0
d__Bacteria; k__norank_d__Bacteria; p__Proteobacteria; c__Gammaproteobacteria; o__Cardiobacteriales; f__Wohlfahrtiimonadaceae; g__Ignatzschineria; s__Ignatzschineria_indica; OTU733	0	0	0	0	0	0	0	0	0	0	0.000128397	0	0	0	0	0	0	0	0.367879		0	0
d__Bacteria; k__norank_d__Bacteria; p__Bacteroidota; c__Bacteroidia; o__Bacteroidales; f__Muribaculaceae; g__norank_f__Muribaculaceae; s__uncultured_Bacteroidales_bacterium_g__norank_f__Muribaculaceae; OTU68	8.55981e-05	4.27991e-05	0	0	0	0	0	0	0	0	0	0	0	0	0	0	0	0	0.120314		0	0
d__Bacteria; k__norank_d__Bacteria; p__Firmicutes; c__Bacilli; o__Bacillales; f__Planococcaceae; g__Lysinibacillus; s__unclassified_g__Lysinibacillus; OTU833	0	0	0	0	0	0	0	0	0	0	8.55981e-05	0	0	0	0	0	0	0	0.367879		4.27991e-05	0
d__Bacteria; k__norank_d__Bacteria; p__Firmicutes; c__Bacilli; o__Lactobacillales; f__Streptococcaceae; g__Lactococcus; s__unclassified_g__Lactococcus; OTU743	0	0	0	0	0	4.27991e-05	0	0	0	0	8.55981e-05	0	0	0	0	0	0	0	0.586071		0	0
d__Bacteria; k__norank_d__Bacteria; p__Bacteroidota; c__Bacteroidia; o__Bacteroidales; f__Muribaculaceae; g__norank_f__Muribaculaceae; s__unclassified_g__norank_f__Muribaculaceae; OTU458	0	0	0	0	0	0	0	0	0	0	0	0	0	0	0	0	0	8.55981e-05	0.367879		0	4.27991e-05
d__Bacteria; k__norank_d__Bacteria; p__Bacteroidota; c__Bacteroidia; o__Bacteroidales; f__Muribaculaceae; g__norank_f__Muribaculaceae; s__uncultured_bacterium_g__norank_f__Muribaculaceae; OTU248	0	0	0	0	0	0	0	0	0	0	0	0	0	0	0	0	0	4.27991e-05	0.367879		0	8.55981e-05
d__Bacteria; k__norank_d__Bacteria; p__Firmicutes; c__Clostridia; o__Lachnospirales; f__Lachnospiraceae; g__Eubacterium_hallii_group; s__Eubacterium_hallii_g__Eubacterium_hallii_group; OTU674	0	0	0	0	0	0	0	0	0	8.55981e-05	0	0	0	0	0	0	0	0	0.367879		0	0
d__Bacteria; k__norank_d__Bacteria; p__unclassified_k__norank_d__Bacteria; c__unclassified_k__norank_d__Bacteria; o__unclassified_k__norank_d__Bacteria; f__unclassified_k__norank_d__Bacteria; g__unclassified_k__norank_d__Bacteria; s__unclassified_k__norank_d__Bacteria; OTU666	0	0	0	0	0	0	0	4.27991e-05	0	4.27991e-05	0	0	0	0	0	0	0	0	0.119433		0	0
d__Bacteria; k__norank_d__Bacteria; p__Bacteroidota; c__Bacteroidia; o__Bacteroidales; f__Bacteroidaceae; g__Bacteroides; s__unclassified_g__Bacteroides; OTU497	0	0	0	0	0	0	0	0	0	0	0	0	0	0	0	0	0	0	1		0	8.55981e-05
d__Bacteria; k__norank_d__Bacteria; p__Firmicutes; c__Bacilli; o__Erysipelotrichales; f__Erysipelotrichaceae; g__norank_f__Erysipelotrichaceae; s__uncultured_bacterium_g__norank_f__Erysipelotrichaceae; OTU324	0	0	0	0	0	0	4.27991e-05	0	0	0	0	0	0	0	4.27991e-05	0	0	0	0.58787		0	0
d__Bacteria; k__norank_d__Bacteria; p__Firmicutes; c__Bacilli; o__Bacillales; f__Bacillaceae; g__unclassified_f__Bacillaceae; s__unclassified_f__Bacillaceae; OTU739	0	0	0	0	0	0	0	0	0	0	8.55981e-05	0	0	0	0	0	0	0	0.367879		0	0
d__Bacteria; k__norank_d__Bacteria; p__Proteobacteria; c__Gammaproteobacteria; o__Xanthomonadales; f__Xanthomonadaceae; g__Xanthomonas; s__unclassified_g__Xanthomonas; OTU658	0	0	0	0	0	0	0	0	0	8.55981e-05	0	0	0	0	0	0	0	0	0.367879		0	0
d__Bacteria; k__norank_d__Bacteria; p__Firmicutes; c__Clostridia; o__Peptostreptococcales-Tissierellales; f__norank_o__Peptostreptococcales-Tissierellales; g__Tepidimicrobium; s__unclassified_g__Tepidimicrobium; OTU692	0	0	0	0	0	0	0	0	0	0	8.55981e-05	0	0	0	0	0	0	0	0.367879		0	0
d__Bacteria; k__norank_d__Bacteria; p__Proteobacteria; c__Alphaproteobacteria; o__Sphingomonadales; f__Sphingomonadaceae; g__Blastomonas; s__uncultured_bacterium_g__Blastomonas; OTU431	0	0	0	0	0	0	0	0	0	0	0	0	0	0	0	0	4.27991e-05	0	0.367879		4.27991e-05	0
d__Bacteria; k__norank_d__Bacteria; p__Firmicutes; c__Bacilli; o__Bacillales; f__Bacillaceae; g__Oceanobacillus; s__Oceanobacillus_oncorhynchi_subsp._incaldanensis; OTU547	0	0	0	0	0	0	4.27991e-05	0	0	0	4.27991e-05	0	0	0	0	0	0	0	0.119433		0	0
d__Bacteria; k__norank_d__Bacteria; p__Bacteroidota; c__Bacteroidia; o__Bacteroidales; f__Muribaculaceae; g__norank_f__Muribaculaceae; s__uncultured_bacterium_g__norank_f__Muribaculaceae; OTU262	0	0	0	0	0	0	0	0	0	0	0	0	0	4.27991e-05	4.27991e-05	0	0	0	0.119433		0	0
d__Bacteria; k__norank_d__Bacteria; p__Bacteroidota; c__Bacteroidia; o__Bacteroidales; f__Tannerellaceae; g__Parabacteroides; s__unclassified_g__Parabacteroides; OTU510	0	0	0	0	0	0	0	0	0	0	0	0	0	0	0	0	0	8.55981e-05	0.367879		0	0
d__Bacteria; k__norank_d__Bacteria; p__Bacteroidota; c__Bacteroidia; o__Bacteroidales; f__Muribaculaceae; g__norank_f__Muribaculaceae; s__uncultured_bacterium_g__norank_f__Muribaculaceae; OTU502	0	0	0	0	0	0	0	0	0	0	0	0	0	0	0	0	0	4.27991e-05	0.367879		0	4.27991e-05
d__Bacteria; k__norank_d__Bacteria; p__Bacteroidota; c__Bacteroidia; o__Flavobacteriales; f__Weeksellaceae; g__Bergeyella; s__uncultured_bacterium_g__Bergeyella; OTU559	0	0	0	0	0	0	8.55981e-05	0	0	0	0	0	0	0	0	0	0	0	0.367879		0	0
d__Bacteria; k__norank_d__Bacteria; p__Proteobacteria; c__Gammaproteobacteria; o__Burkholderiales; f__Alcaligenaceae; g__Parapusillimonas; s__uncultured_bacterium_g__Parapusillimonas; OTU789	0	0	0	0	0	0	0	0	0	0	0	0	0	0	0	0	0	0	1		8.55981e-05	0
d__Bacteria; k__norank_d__Bacteria; p__Firmicutes; c__Clostridia; o__Oscillospirales; f__UCG-010; g__norank_f__UCG-010; s__unclassified_g__norank_f__UCG-010; OTU228	0	0	0	0	0	0	0	0	0	0	0	0	8.55981e-05	0	0	0	0	0	0.367879		0	0
d__Bacteria; k__norank_d__Bacteria; p__Firmicutes; c__Bacilli; o__RF39; f__norank_o__RF39; g__norank_f__norank_o__RF39; s__uncultured_bacterium_g__norank_f__norank_o__RF39; OTU777	0	0	0	0	0	0	0	0	0	0	0	8.55981e-05	0	0	0	0	0	0	0.367879		0	0
d__Bacteria; k__norank_d__Bacteria; p__Bacteroidota; c__Bacteroidia; o__Bacteroidales; f__unclassified_o__Bacteroidales; g__unclassified_o__Bacteroidales; s__unclassified_o__Bacteroidales; OTU555	0	0	0	0	0	0	4.27991e-05	4.27991e-05	0	0	0	0	0	0	0	0	0	0	0.119433		0	0
d__Bacteria; k__norank_d__Bacteria; p__Bacteroidota; c__Bacteroidia; o__Bacteroidales; f__unclassified_o__Bacteroidales; g__unclassified_o__Bacteroidales; s__unclassified_o__Bacteroidales; OTU102	0	0	8.55981e-05	0	0	0	0	0	0	0	0	0	0	0	0	0	0	0	0.367879		0	0
d__Bacteria; k__norank_d__Bacteria; p__Bacteroidota; c__Bacteroidia; o__Bacteroidales; f__Prevotellaceae; g__Prevotella; s__uncultured_bacterium_g__Prevotella; OTU705	0	0	0	0	0	0	0	0	0	0	8.55981e-05	0	0	0	0	0	0	0	0.367879		0	0
d__Bacteria; k__norank_d__Bacteria; p__unclassified_k__norank_d__Bacteria; c__unclassified_k__norank_d__Bacteria; o__unclassified_k__norank_d__Bacteria; f__unclassified_k__norank_d__Bacteria; g__unclassified_k__norank_d__Bacteria; s__unclassified_k__norank_d__Bacteria; OTU594	0	0	0	0	0	0	0	4.27991e-05	0	4.27991e-05	0	0	0	0	0	0	0	0	0.119433		0	0
d__Bacteria; k__norank_d__Bacteria; p__Bacteroidota; c__Bacteroidia; o__Bacteroidales; f__Prevotellaceae; g__Alloprevotella; s__unclassified_g__Alloprevotella; OTU508	0	0	0	0	0	0	0	0	0	0	0	0	0	0	0	0	0	4.27991e-05	0.367879		0	4.27991e-05
d__Bacteria; k__norank_d__Bacteria; p__Firmicutes; c__Bacilli; o__RF39; f__norank_o__RF39; g__norank_f__norank_o__RF39; s__uncultured_bacterium_g__norank_f__norank_o__RF39; OTU371	0	0	0	0	0	0	0	0	0	4.27991e-05	0	0	0	0	4.27991e-05	0	0	0	0.58787		0	0
d__Bacteria; k__norank_d__Bacteria; p__Firmicutes; c__Clostridia; o__Lachnospirales; f__Lachnospiraceae; g__Eubacterium_ventriosum_group; s__unclassified_g__Eubacterium_ventriosum_group; OTU12	8.55981e-05	0	0	0	0	0	0	0	0	0	0	0	0	0	0	0	0	0	0.367879		0	0
d__Bacteria; k__norank_d__Bacteria; p__unclassified_k__norank_d__Bacteria; c__unclassified_k__norank_d__Bacteria; o__unclassified_k__norank_d__Bacteria; f__unclassified_k__norank_d__Bacteria; g__unclassified_k__norank_d__Bacteria; s__unclassified_k__norank_d__Bacteria; OTU301	0	0	0	0	0	0	0	0	0	0	0	0	0	0	4.27991e-05	4.27991e-05	0	0	0.119433		0	0
d__Bacteria; k__norank_d__Bacteria; p__Firmicutes; c__Bacilli; o__Lactobacillales; f__Lactobacillaceae; g__Pediococcus; s__Pediococcus_pentosaceus_g__Pediococcus; OTU819	0	0	0	0	0	0	0	0	0	0	4.27991e-05	0	0	0	0	0	0	0	0.367879		4.27991e-05	0
d__Bacteria; k__norank_d__Bacteria; p__Firmicutes; c__Bacilli; o__Mycoplasmatales; f__Mycoplasmataceae; g__Mycoplasma; s__Metamycoplasma_sualvi; OTU525	0	0	0	0	0	0	8.55981e-05	0	0	0	0	0	0	0	0	0	0	0	0.367879		0	0
d__Bacteria; k__norank_d__Bacteria; p__Bacteroidota; c__Bacteroidia; o__Bacteroidales; f__Muribaculaceae; g__norank_f__Muribaculaceae; s__uncultured_bacterium_g__norank_f__Muribaculaceae; OTU582	0	0	0	0	0	0	0	8.55981e-05	0	0	0	0	0	0	0	0	0	0	0.367879		0	0
d__Bacteria; k__norank_d__Bacteria; p__Bacteroidota; c__Bacteroidia; o__Bacteroidales; f__Rikenellaceae; g__Alistipes; s__unclassified_g__Alistipes; OTU377	0	0	0	0	0	0	0	0	0	0	0	0	0	0	0	8.55981e-05	0	0	0.367879		0	0
d__Bacteria; k__norank_d__Bacteria; p__Firmicutes; c__Clostridia; o__Lachnospirales; f__Defluviitaleaceae; g__Defluviitaleaceae_UCG-011; s__uncultured_bacterium_g__Defluviitaleaceae_UCG-011; OTU111	0	0	8.55981e-05	0	0	0	0	0	0	0	0	0	0	0	0	0	0	0	0.367879		0	0
d__Bacteria; k__norank_d__Bacteria; p__Firmicutes; c__Clostridia; o__Oscillospirales; f__norank_o__Oscillospirales; g__Hydrogenoanaerobacterium; s__uncultured_bacterium_g__Hydrogenoanaerobacterium; OTU148	0	0	0	4.27991e-05	0	0	0	0	0	0	0	0	4.27991e-05	0	0	0	0	0	0.58787		0	0
d__Bacteria; k__norank_d__Bacteria; p__Bacteroidota; c__Bacteroidia; o__Sphingobacteriales; f__Sphingobacteriaceae; g__Sphingobacterium; s__Sphingobacterium_hotanense; OTU719	0	0	0	0	0	0	0	0	0	0	8.55981e-05	0	0	0	0	0	0	0	0.367879		0	0
d__Bacteria; k__norank_d__Bacteria; p__Firmicutes; c__Bacilli; o__Bacillales; f__Bacillaceae; g__unclassified_f__Bacillaceae; s__unclassified_f__Bacillaceae; OTU690	0	0	0	0	0	0	0	0	0	0	4.27991e-05	0	0	0	0	0	0	0	0.367879		0	0
d__Bacteria; k__norank_d__Bacteria; p__Bacteroidota; c__Bacteroidia; o__Bacteroidales; f__Muribaculaceae; g__norank_f__Muribaculaceae; s__uncultured_bacterium_g__norank_f__Muribaculaceae; OTU563	0	0	0	0	0	0	0	4.27991e-05	0	0	0	0	0	0	0	0	0	0	0.367879		0	0
d__Bacteria; k__norank_d__Bacteria; p__Firmicutes; c__Clostridia; o__Oscillospirales; f__Butyricicoccaceae; g__UCG-009; s__uncultured_bacterium_g__UCG-009; OTU357	4.27991e-05	0	0	0	0	0	0	0	0	0	0	0	0	0	0	0	0	0	0.367879		0	0
d__Bacteria; k__norank_d__Bacteria; p__Proteobacteria; c__Gammaproteobacteria; o__Burkholderiales; f__Neisseriaceae; g__Neisseria; s__Neisseria_sp._10022; OTU562	0	0	0	0	0	0	0	4.27991e-05	0	0	0	0	0	0	0	0	0	0	0.367879		0	0
d__Bacteria; k__norank_d__Bacteria; p__Bacteroidota; c__Bacteroidia; o__Bacteroidales; f__Bacteroidetes_vadinHA17; g__norank_f__Bacteroidetes_vadinHA17; s__uncultured_soil_bacterium_g__norank_f__Bacteroidetes_vadinHA17; OTU569	0	0	0	0	0	0	0	0	0	4.27991e-05	0	0	0	0	0	0	0	0	0.367879		0	0
d__Bacteria; k__norank_d__Bacteria; p__Proteobacteria; c__Gammaproteobacteria; o__Burkholderiales; f__Alcaligenaceae; g__Paenalcaligenes; s__unclassified_g__Paenalcaligenes; OTU796	0	0	0	0	0	0	0	0	0	0	0	0	0	0	0	0	0	0	1		4.27991e-05	0
d__Bacteria; k__norank_d__Bacteria; p__Bacteroidota; c__Bacteroidia; o__Bacteroidales; f__Muribaculaceae; g__norank_f__Muribaculaceae; s__uncultured_bacterium_g__norank_f__Muribaculaceae; OTU79	0	4.27991e-05	0	0	0	0	0	0	0	0	0	0	0	0	0	0	0	0	0.367879		0	0
d__Bacteria; k__norank_d__Bacteria; p__Firmicutes; c__Bacilli; o__Paenibacillales; f__Paenibacillaceae; g__Paenibacillus; s__uncultured_bacterium_g__Paenibacillus; OTU732	0	0	0	0	0	0	0	0	0	0	4.27991e-05	0	0	0	0	0	0	0	0.367879		0	0
d__Bacteria; k__norank_d__Bacteria; p__Bacteroidota; c__Bacteroidia; o__Bacteroidales; f__unclassified_o__Bacteroidales; g__unclassified_o__Bacteroidales; s__unclassified_o__Bacteroidales; OTU519	0	0	0	0	0	0	0	0	0	0	0	0	0	0	0	0	0	0	1		0	4.27991e-05
d__Bacteria; k__norank_d__Bacteria; p__Actinobacteriota; c__Actinobacteria; o__Corynebacteriales; f__Dietziaceae; g__Dietzia; s__Dietzia_sp._oral_taxon_368; OTU707	0	0	0	0	0	0	0	0	0	0	4.27991e-05	0	0	0	0	0	0	0	0.367879		0	0
d__Bacteria; k__norank_d__Bacteria; p__Firmicutes; c__Clostridia; o__Oscillospirales; f__Ruminococcaceae; g__Ruminococcus; s__unclassified_g__Ruminococcus; OTU731	0	0	0	0	0	0	0	0	0	0	4.27991e-05	0	0	0	0	0	0	0	0.367879		0	0
d__Bacteria; k__norank_d__Bacteria; p__Cyanobacteria; c__Cyanobacteriia; o__Chloroplast; f__norank_o__Chloroplast; g__norank_f__norank_o__Chloroplast; s__unclassified_g__norank_f__norank_o__Chloroplast; OTU698	0	0	0	0	0	0	0	0	0	0	4.27991e-05	0	0	0	0	0	0	0	0.367879		0	0
d__Bacteria; k__norank_d__Bacteria; p__Actinobacteriota; c__Actinobacteria; o__Micrococcales; f__Microbacteriaceae; g__unclassified_f__Microbacteriaceae; s__unclassified_f__Microbacteriaceae; OTU783	0	0	0	0	0	0	0	0	0	0	0	0	0	0	0	0	0	0	1		4.27991e-05	0
d__Bacteria; k__norank_d__Bacteria; p__Firmicutes; c__Bacilli; o__Thermoactinomycetales; f__Thermoactinomycetaceae; g__Melghirimyces; s__Melghirimyces_thermohalophilus; OTU697	0	0	0	0	0	0	0	0	0	0	4.27991e-05	0	0	0	0	0	0	0	0.367879		0	0
d__Bacteria; k__norank_d__Bacteria; p__Firmicutes; c__Bacilli; o__Thermoactinomycetales; f__Thermoactinomycetaceae; g__Risungbinella; s__unclassified_g__Risungbinella; OTU702	0	0	0	0	0	0	0	0	0	0	4.27991e-05	0	0	0	0	0	0	0	0.367879		0	0
d__Bacteria; k__norank_d__Bacteria; p__unclassified_k__norank_d__Bacteria; c__unclassified_k__norank_d__Bacteria; o__unclassified_k__norank_d__Bacteria; f__unclassified_k__norank_d__Bacteria; g__unclassified_k__norank_d__Bacteria; s__unclassified_k__norank_d__Bacteria; OTU657	0	0	0	0	0	0	0	0	0	4.27991e-05	0	0	0	0	0	0	0	0	0.367879		0	0
