# Supplementary material for: Small intestinal flora graft alters fecal flora, stool, cytokines and mood status in healthy mice
Source: Life Sci Alliance. 2021 Jul 23;4(9):e202101039. doi: 10.26508/lsa.202101039 (PMC8321674; doi:10.26508/lsa.202101039)
Supplement: Supplementary file 2 [file LSA-2021-01039_TableS2.xlsx]

## Sheet: S.table2
211 OTUs that showed a significant difference among the three recipient groups' samples
OTU ID	Relative abundance of OUT in SIG	Relative abundance of OTU in LIG	OTUs being more abundant in the small intestinal graft or in the large intestinal graft	CON						SIMT						LIMT						P value reported by Kruskal-Wallis H test
				CON1	CON2	CON3	CON4	CON5	CON6	SIMT1	SIMT2	SIMT3	SIMT4	SIMT5	SIMT6	LIMT1	LIMT2	LIMT3	LIMT4	LIMT5	LIMT6
d__Bacteria; k__norank_d__Bacteria; p__Firmicutes; c__Bacilli; o__Lactobacillales; f__Lactobacillaceae; g__Lactobacillus; s__Lactobacillus_murinus; OTU634	0.204408	0.00641986	small intestinal graft	0.00132677	0.0107854	0.0145517	0.00226835	0.0365076	0.00372352	0.0457522	0.0187032	0.234453	0.045367	0.555361	0.268478	0.00124117	0.0288466	0.020244	0.0328269	0.00342392	0.00522149	0.0106323
d__Bacteria; k__norank_d__Bacteria; p__Firmicutes; c__Bacilli; o__Lactobacillales; f__Lactobacillaceae; g__Lactobacillus; s__Lactobacillus_reuteri; OTU542	0.0258934	0.00261074	small intestinal graft	0.000342392	0.000256794	0.00162636	8.55981e-05	0.0115129	0.00128397	0.225123	0.0247379	0.000727584	0.0124545	0.0216991	0.0474214	0.000984378	0.000128397	0.0225551	0.0142521	0.00269634	0.00603467	0.033845
d__Bacteria; k__norank_d__Bacteria; p__Firmicutes; c__Bacilli; o__Erysipelotrichales; f__Erysipelotrichaceae; g__Allobaculum; s__uncultured_bacterium_g__Allobaculum; OTU29	0.00350952	0	small intestinal graft	0.114659	0.0824738	0.000128397	0.0162636	0	0.0335973	0.00278194	0.000128397	0.000171196	0.00047079	0.00231115	4.27991e-05	0	0	0	0	0	0	0.00499899
d__Bacteria; k__norank_d__Bacteria; p__Firmicutes; c__Bacilli; o__Erysipelotrichales; f__Erysipelotrichaceae; g__Turicibacter; s__uncultured_bacterium_g__Turicibacter; OTU577	0.000213995	4.27991e-05	small intestinal graft	0.0326129	8.55981e-05	0.00560668	0	0	0.0193452	0.00838862	0.0801626	0.000427991	0.00933019	0.0204579	0.0298309	0	0	0	0	0	0	0.00527874
d__Bacteria; k__norank_d__Bacteria; p__Bacteroidota; c__Bacteroidia; o__Bacteroidales; f__Muribaculaceae; g__norank_f__Muribaculaceae; s__uncultured_Bacteroidales_bacterium_g__norank_f__Muribaculaceae; OTU628	0.0381768	0.00218275	small intestinal graft	0	4.27991e-05	0.00723304	0	0.00423711	0	0.000855981	0.000727584	0.0135245	0.000427991	0.000171196	0.00115557	0.0140381	0.0469934	0.00201156	0.0192168	0.00637706	0.00136957	0.0237402
d__Bacteria; k__norank_d__Bacteria; p__Bacteroidota; c__Bacteroidia; o__Bacteroidales; f__Muribaculaceae; g__norank_f__Muribaculaceae; s__uncultured_bacterium_g__norank_f__Muribaculaceae; OTU622	0.000513589	0	small intestinal graft	0	4.27991e-05	0.0929168	0	0	0	0.000299593	0.00308153	0.00415151	0.000513589	4.27991e-05	0.010015	0	0	0	0	0	0	0.00546312
d__Bacteria; k__norank_d__Bacteria; p__Actinobacteriota; c__Actinobacteria; o__Bifidobacteriales; f__Bifidobacteriaceae; g__Bifidobacterium; s__Bifidobacterium_animalis; OTU795	0.0279906	0.00205435	small intestinal graft	0.00243955	0.0124117	0.00192596	0.00205435	0	0.00209715	0.0308153	0.00333833	0.000941579	0.0106998	0.000128397	0.0046223	0.000256794	0	0	0	0	0.000984378	0.0193133
d__Bacteria; k__norank_d__Bacteria; p__Bacteroidota; c__Bacteroidia; o__Bacteroidales; f__Muribaculaceae; g__norank_f__Muribaculaceae; s__uncultured_bacterium_g__norank_f__Muribaculaceae; OTU830	0.00252514	0	small intestinal graft	0	4.27991e-05	0.0557244	0	0	0	0.00659105	0.00372352	0.0117697	0.000641986	0.000171196	0.0174192	0	0	0	0	0	0	0.00485203
d__Bacteria; k__norank_d__Bacteria; p__Firmicutes; c__Bacilli; o__Erysipelotrichales; f__Erysipelotrichaceae; g__Ileibacterium; s__Ileibacterium_valens; OTU835	0.0045367	0	small intestinal graft	0	0	0.0259362	0	0	0	0.00770383	0.0112134	0.000299593	0.0188316	0.000171196	0.00124117	0	0	0	0	0	0	0.00461164
d__Bacteria; k__norank_d__Bacteria; p__Bacteroidota; c__Bacteroidia; o__Bacteroidales; f__Rikenellaceae; g__Alistipes; s__uncultured_bacterium_g__Alistipes; OTU181	8.55981e-05	0	small intestinal graft	0.000770383	0.00355232	0	8.55981e-05	0.00325273	0.00188316	0	0	0	0	0	0	0	0.00616306	0.00265354	0.0175048	0.0334261	0	0.0239675
d__Bacteria; k__norank_d__Bacteria; p__Proteobacteria; c__Gammaproteobacteria; o__Enterobacterales; f__Enterobacteriaceae; g__Escherichia-Shigella; s__Escherichia_coli_g__Escherichia-Shigella; OTU704	0.0301733	0	small intestinal graft	0	4.27991e-05	0	0	0	0	0.000128397	4.27991e-05	0.000342392	8.55981e-05	0.0217847	0	0	4.27991e-05	0	0	0	0	0.0114189
d__Bacteria; k__norank_d__Bacteria; p__Bacteroidota; c__Bacteroidia; o__Bacteroidales; f__Muribaculaceae; g__norank_f__Muribaculaceae; s__uncultured_Bacteroidales_bacterium_g__norank_f__Muribaculaceae; OTU615	0.00218275	0	small intestinal graft	0	0	0.0250374	0	0	0	0.00213995	0.000128397	0.00243955	0.000213995	0	0.00945859	0	0	0	0	0	0	0.0181444
d__Bacteria; k__norank_d__Bacteria; p__Proteobacteria; c__Gammaproteobacteria; o__Pseudomonadales; f__Moraxellaceae; g__Psychrobacter; s__unclassified_g__Psychrobacter; OTU745	0.00406591	0	small intestinal graft	0	0	0	0	0	4.27991e-05	4.27991e-05	0	0	8.55981e-05	0.0271346	0.000128397	0	0	0	0	0	0	0.0248693
d__Bacteria; k__norank_d__Bacteria; p__Firmicutes; c__Bacilli; o__Lactobacillales; f__Lactobacillaceae; g__Lactobacillus; s__uncultured_bacterium_g__Lactobacillus; OTU768	0.000299593	0.000213995	small intestinal graft	0	0	4.27991e-05	0	0.000599187	4.27991e-05	0.00659105	0.00149797	0.000727584	0.00124117	0.000128397	0.0116413	4.27991e-05	0	0.00132677	0.00141237	4.27991e-05	8.55981e-05	0.0112336
d__Bacteria; k__norank_d__Bacteria; p__Firmicutes; c__Bacilli; o__Staphylococcales; f__Staphylococcaceae; g__Staphylococcus; s__Staphylococcus_warneri; OTU604	0.000513589	0	small intestinal graft	0	0	0	0	4.27991e-05	0	0.000684785	0.00402311	0	0.00406591	0.00115557	0.00697625	0	0.000171196	0.000256794	8.55981e-05	0	4.27991e-05	0.0117123
d__Bacteria; k__norank_d__Bacteria; p__Bacteroidota; c__Bacteroidia; o__Bacteroidales; f__Muribaculaceae; g__norank_f__Muribaculaceae; s__uncultured_Bacteroidales_bacterium_g__norank_f__Muribaculaceae; OTU779	0.00089878	0	small intestinal graft	0	0	0.00851701	0	0	0	0.00132677	4.27991e-05	0.000813182	8.55981e-05	0	0.00368072	0	0	0	0	0	0	0.0181444
d__Bacteria; k__norank_d__Bacteria; p__Firmicutes; c__Clostridia; o__Lachnospirales; f__Lachnospiraceae; g__unclassified_f__Lachnospiraceae; s__unclassified_f__Lachnospiraceae; OTU277	4.27991e-05	0	small intestinal graft	0	8.55981e-05	0	0.000213995	0.000171196	0	0	0	0	0	0	0	0	0.0126257	0.000941579	0.000641986	0.000599187	0	0.035563
d__Bacteria; k__norank_d__Bacteria; p__Cyanobacteria; c__Cyanobacteriia; o__Chloroplast; f__norank_o__Chloroplast; g__norank_f__norank_o__Chloroplast; s__Phaseolus_vulgaris_g__norank_f__norank; OTU820	0.00154077	0	small intestinal graft	0	0	0	0	0	0	0.000427991	4.27991e-05	0	0	0.0106142	0	0	0	0	0	0	0	0.0345016
d__Bacteria; k__norank_d__Bacteria; p__Actinobacteriota; c__Actinobacteria; o__Corynebacteriales; f__Corynebacteriaceae; g__Corynebacterium; s__Corynebacterium_stationis; OTU759	0.00273914	0	small intestinal graft	0	0.000128397	0	0	0	0	8.55981e-05	0.000128397	0	4.27991e-05	0.00582067	0.00303873	0	0	0	0	0	4.27991e-05	0.0210024
d__Bacteria; k__norank_d__Bacteria; p__Firmicutes; c__Clostridia; o__Peptostreptococcales-Tissierellales; f__Peptostreptococcaceae; g__Romboutsia; s__Romboutsia_ilealis; OTU546	0.000256794	0	small intestinal graft	0	0	0.00047079	0	0	0	0.00522149	0.000684785	0.000128397	0.000641986	0.000128397	0.000299593	0	0	0	0	0	0	0.0017627
d__Bacteria; k__norank_d__Bacteria; p__Firmicutes; c__Bacilli; o__Lactobacillales; f__Lactobacillaceae; g__Lactobacillus; s__uncultured_bacterium_g__Lactobacillus; OTU553	4.27991e-05	0	small intestinal graft	0	0	8.55981e-05	0	0.000128397	0	0.0044939	0.000342392	0.000128397	0.00089878	0	0.000855981	0	0	0.000128397	0	0	0	0.0170578
d__Bacteria; k__norank_d__Bacteria; p__Firmicutes; c__Clostridia; o__Clostridia_vadinBB60_group; f__norank_o__Clostridia_vadinBB60_group; g__norank_f__norank_o__Clostridia_vadinBB60_group; s__uncultured_bacterium_g__norank_f__norank_o__Clostridia_vadinBB60_group; OTU448	4.27991e-05	0	small intestinal graft	0	0	0	0	4.27991e-05	0	0	0	0	0	0	0	0	0.00124117	0.00102718	0.00089878	0.00380912	0	0.0216911
d__Bacteria; k__norank_d__Bacteria; p__Firmicutes; c__Bacilli; o__Staphylococcales; f__Staphylococcaceae; g__Jeotgalicoccus; s__uncultured_bacterium_g__Jeotgalicoccus; OTU813	0.000855981	0	small intestinal graft	0	0	0	0	0	0	0	4.27991e-05	0	0	0.00517869	0.000385192	0	0	0	0	0	0	0.0345016
d__Bacteria; k__norank_d__Bacteria; p__Firmicutes; c__Bacilli; o__Lactobacillales; f__Enterococcaceae; g__Enterococcus; s__Enterococcus_faecalis_g__Enterococcus; OTU804	0.00505029	0	small intestinal graft	0	0	0	0	0	0	8.55981e-05	8.55981e-05	0	8.55981e-05	0.000427991	0.000299593	0	0.000128397	4.27991e-05	0	4.27991e-05	0	0.0128247
d__Bacteria; k__norank_d__Bacteria; p__Firmicutes; c__Bacilli; o__Lactobacillales; f__Aerococcaceae; g__Facklamia; s__Facklamia_tabacinasalis; OTU801	0.000813182	0	small intestinal graft	0	0	0	0	0	0	4.27991e-05	0	8.55981e-05	0	0.00479349	0	0	0	0	0	0	0	0.0345016
d__Bacteria; k__norank_d__Bacteria; p__Actinobacteriota; c__Coriobacteriia; o__Coriobacteriales; f__Eggerthellaceae; g__unclassified_f__Eggerthellaceae; s__unclassified_f__Eggerthellaceae; OTU767	0.000171196	0	small intestinal graft	0	0.000213995	0	0	0	0	0.00119837	0.000556388	0	0.000599187	0	0.00089878	0	0	0	8.55981e-05	0	0	0.0491054
d__Bacteria; k__norank_d__Bacteria; p__Cyanobacteria; c__Cyanobacteriia; o__Chloroplast; f__norank_o__Chloroplast; g__norank_f__norank_o__Chloroplast; s__unclassified_g__norank_f__norank_o__Chloroplast; OTU725	0.000299593	0	small intestinal graft	0	0	0	0	0	0	0.000427991	4.27991e-05	0	0.000299593	0.00166916	0	0	0	0	0	0	0	0.00854298
d__Bacteria; k__norank_d__Bacteria; p__Firmicutes; c__Bacilli; o__Lactobacillales; f__Aerococcaceae; g__Aerococcus; s__Aerococcus_urinaeequi; OTU802	0.000171196	0	small intestinal graft	0	0	0	0	0	0	0	0	0	4.27991e-05	0.000427991	0.00115557	0	0	0	0	0	0	0.0345016
d__Bacteria; k__norank_d__Bacteria; p__Bacteroidota; c__Bacteroidia; o__Bacteroidales; f__Muribaculaceae; g__norank_f__Muribaculaceae; s__uncultured_bacterium_g__norank_f__Muribaculaceae; OTU751	4.27991e-05	0	small intestinal graft	0	0	0	0	0	0	0.000299593	0.000385192	0	0.000128397	0	0.00047079	0	0	0	0	0	0	0.00854298
d__Bacteria; k__norank_d__Bacteria; p__Bacteroidota; c__Bacteroidia; o__Bacteroidales; f__Prevotellaceae; g__Alloprevotella; s__uncultured_Bacteroidales_bacterium_g__Alloprevotella; OTU274	4.27991e-05	0.172395	large intestinal graft	0.00338113	0.00534988	0.0361224	0.000213995	0.00612027	0.0163064	0	0	0.137471	0	0.000128397	0.00166916	0.0171196	0.0875669	0.0423283	0.0583351	0.00218275	0.0300877	0.0447622
d__Bacteria; k__norank_d__Bacteria; p__Bacteroidota; c__Bacteroidia; o__Bacteroidales; f__Muribaculaceae; g__norank_f__Muribaculaceae; s__uncultured_bacterium_g__norank_f__Muribaculaceae; OTU222	0.000256794	0.0578215	large intestinal graft	0.00997218	0.017462	0.0194736	0.000770383	0.00483629	0.0237963	0.000256794	0.0130537	0.011085	0.00175476	0.000342392	0.000385192	0.0609887	0.0302161	0.0107854	0.00522149	0.0188316	0.0656538	0.033845
d__Bacteria; k__norank_d__Bacteria; p__Bacteroidota; c__Bacteroidia; o__Bacteroidales; f__Muribaculaceae; g__norank_f__Muribaculaceae; s__uncultured_bacterium_g__norank_f__Muribaculaceae; OTU276	0.000556388	0.00136957	large intestinal graft	0.00154077	0.00243955	0.00500749	8.55981e-05	0.00231115	0.00209715	0	0	0.00231115	0.000342392	0	0.00111278	0.00419431	0.112091	0.0124545	0.0044083	0.0395891	0.00316713	0.00259743
d__Bacteria; k__norank_d__Bacteria; p__Bacteroidota; c__Bacteroidia; o__Bacteroidales; f__Muribaculaceae; g__norank_f__Muribaculaceae; s__uncultured_bacterium_g__norank_f__Muribaculaceae; OTU208	0	0.00748984	large intestinal graft	0.00380912	0.0045367	0.00941579	8.55981e-05	0.00188316	0.00500749	4.27991e-05	0.00166916	0.0091162	4.27991e-05	4.27991e-05	0.000342392	0.00166916	0.0134389	0.0210571	0.0186604	0.00868821	0.0092874	0.0161147
d__Bacteria; k__norank_d__Bacteria; p__Firmicutes; c__Clostridia; o__Oscillospirales; f__Oscillospiraceae; g__unclassified_f__Oscillospiraceae; s__unclassified_f__Oscillospiraceae; OTU320	0	0.000513589	large intestinal graft	0.00256794	0.00522149	0.000599187	0.00333833	0.00500749	0.000171196	0.000342392	0.000513589	4.27991e-05	8.55981e-05	4.27991e-05	0	0.000213995	0.0205863	0.0233255	0.00864541	0.0292318	8.55981e-05	0.0179794
d__Bacteria; k__norank_d__Bacteria; p__Firmicutes; c__Clostridia; o__Lachnospirales; f__Lachnospiraceae; g__Lachnoclostridium; s__Dorea_sp._5-2; OTU507	0.000299593	0.0246095	large intestinal graft	0.00359512	0.00136957	0.00145517	0.00111278	0.00513589	0.00213995	0.00106998	0.000128397	0.000427991	4.27991e-05	0.000128397	0.00115557	0.000941579	0.00774663	0.00877381	0.00282474	0.00303873	0.0219131	0.00603284
d__Bacteria; k__norank_d__Bacteria; p__Firmicutes; c__Clostridia; o__Oscillospirales; f__Eubacterium_coprostanoligenes_group; g__norank_f__Eubacterium_coprostanoligenes_group; s__gut_metagenome_g__norank_f__Eubacterium_coprostanoligenes_group; OTU247	0	0.00179756	large intestinal graft	0.0231543	0.00222555	4.27991e-05	0.00047079	0	0.00089878	0	0	0.000427991	0.000128397	4.27991e-05	0	0.0122405	0.0044083	0.00089878	0.00089878	0.000513589	0.00162636	0.0138058
d__Bacteria; k__norank_d__Bacteria; p__Bacteroidota; c__Bacteroidia; o__Bacteroidales; f__Muribaculaceae; g__norank_f__Muribaculaceae; s__uncultured_Bacteroidales_bacterium_g__norank_f__Muribaculaceae; OTU54	0.000427991	0.00171196	large intestinal graft	0.00552108	0.00299593	0.000128397	8.55981e-05	0.00333833	0.00582067	4.27991e-05	0.000128397	0.00136957	0.000171196	8.55981e-05	8.55981e-05	0.00132677	0.00158357	0.00967259	0.00346672	0.00372352	0.00513589	0.0213051
d__Bacteria; k__norank_d__Bacteria; p__Bacteroidota; c__Bacteroidia; o__Bacteroidales; f__Bacteroidaceae; g__Bacteroides; s__Bacteroides_acidifaciens; OTU650	4.27991e-05	0.000855981	large intestinal graft	0.00333833	0.00308153	0.0044939	0.000556388	0.00308153	0.00646266	0.000213995	0.00089878	0.00303873	0.000941579	0.000213995	8.55981e-05	0.00201156	0.00380912	0.00372352	0.00265354	0.000984378	0.00560668	0.0187048
d__Bacteria; k__norank_d__Bacteria; p__Bacteroidota; c__Bacteroidia; o__Bacteroidales; f__Muribaculaceae; g__norank_f__Muribaculaceae; s__uncultured_bacterium_g__norank_f__Muribaculaceae; OTU625	0.000256794	0.00141237	large intestinal graft	0.00252514	0.00329553	0.00119837	0.000513589	0.00106998	0.000599187	0	8.55981e-05	0.00342392	4.27991e-05	4.27991e-05	4.27991e-05	0.000128397	0.0207147	0.00303873	0.00115557	0.00547828	0.00047079	0.0483131
d__Bacteria; k__norank_d__Bacteria; p__Firmicutes; c__Clostridia; o__Oscillospirales; f__Oscillospiraceae; g__Oscillibacter; s__unclassified_g__Oscillibacter; OTU453	0	0.00205435	large intestinal graft	0.00286754	0.00196876	0.000599187	0.000684785	0.00342392	0.000385192	0	0.000171196	0	0	0	0	0.00149797	0.00205435	0.00192596	0.0106998	0.0146373	0.000770383	0.00225052
d__Bacteria; k__norank_d__Bacteria; p__Firmicutes; c__Clostridia; o__Lachnospirales; f__Lachnospiraceae; g__unclassified_f__Lachnospiraceae; s__unclassified_f__Lachnospiraceae; OTU184	0	0.00419431	large intestinal graft	0.00333833	0.00102718	0.000427991	0.00162636	0.00620586	0.000513589	0.000171196	0	0.000641986	0	8.55981e-05	0	0.000770383	0.00586347	0.00821742	0.00213995	0.00205435	0.00522149	0.00382254
d__Bacteria; k__norank_d__Bacteria; p__Firmicutes; c__Clostridia; o__Oscillospirales; f__Ruminococcaceae; g__Anaerotruncus; s__uncultured_bacterium_g__Anaerotruncus; OTU154	4.27991e-05	0.000213995	large intestinal graft	0.000770383	0.000941579	0.000256794	0.008945	0.00517869	0.000385192	4.27991e-05	0.000299593	0.000171196	0	4.27991e-05	0	0.000813182	0.00252514	0.00748984	0.00710464	0.00641986	0.000599187	0.00358317
d__Bacteria; k__norank_d__Bacteria; p__Firmicutes; c__Clostridia; o__Lachnospirales; f__Lachnospiraceae; g__unclassified_f__Lachnospiraceae; s__unclassified_f__Lachnospiraceae; OTU230	0	0.00128397	large intestinal graft	0.000556388	0.000556388	0.000299593	0.00363792	8.55981e-05	0.000813182	0.000727584	0.000684785	4.27991e-05	0.000427991	0	8.55981e-05	0.00256794	0.0178044	0.00149797	0.00149797	0.00624866	0.00136957	0.00650885
d__Bacteria; k__norank_d__Bacteria; p__Firmicutes; c__Clostridia; o__Oscillospirales; f__Oscillospiraceae; g__unclassified_f__Oscillospiraceae; s__unclassified_f__Oscillospiraceae; OTU225	4.27991e-05	0.00175476	large intestinal graft	0.00175476	0.00261074	0.000855981	0.00261074	0.00205435	0.00500749	0.000213995	0.000427991	4.27991e-05	8.55981e-05	4.27991e-05	0	0.00162636	0.00171196	0.00505029	0.00997218	0.00325273	0.000599187	0.00333986
d__Bacteria; k__norank_d__Bacteria; p__Firmicutes; c__Clostridia; o__Lachnospirales; f__Lachnospiraceae; g__norank_f__Lachnospiraceae; s__unclassified_g__norank_f__Lachnospiraceae; OTU285	0	0.00106998	large intestinal graft	0.000213995	0.000256794	0.000427991	0.00106998	0.00175476	0.000385192	0.000641986	0.00175476	4.27991e-05	0.000727584	4.27991e-05	4.27991e-05	0.00295314	0.0150225	0.00877381	0.00102718	0.00111278	0.000556388	0.0450796
d__Bacteria; k__norank_d__Bacteria; p__Firmicutes; c__Clostridia; o__Oscillospirales; f__Oscillospiraceae; g__Colidextribacter; s__uncultured_bacterium_g__Colidextribacter; OTU513	0	0.00239675	large intestinal graft	0.00231115	0.0045367	0.00124117	0.00261074	0.00205435	0.00273914	0.000342392	0.000427991	0.000213995	0.000128397	4.27991e-05	4.27991e-05	0.00291034	0.00278194	0.00222555	0.00273914	0.00543548	0.00192596	0.00281376
d__Bacteria; k__norank_d__Bacteria; p__Firmicutes; c__Clostridia; o__Oscillospirales; f__Oscillospiraceae; g__Intestinimonas; s__uncultured_bacterium_g__Intestinimonas; OTU443	0	0.000641986	large intestinal graft	0.00291034	0.00676225	0.000941579	0.00273914	0.00175476	0.00141237	0.000128397	0.000256794	0	0.000128397	0	0	0.00166916	0.00256794	0.00594907	0.00179756	0.00513589	0.00188316	0.00313039
d__Bacteria; k__norank_d__Bacteria; p__Bacteroidota; c__Bacteroidia; o__Bacteroidales; f__Muribaculaceae; g__norank_f__Muribaculaceae; s__uncultured_bacterium_g__norank_f__Muribaculaceae; OTU55	0	0.00235395	large intestinal graft	0.00243955	0.00226835	0.000342392	0.000599187	0.000599187	0.0151937	0	0	0.00166916	4.27991e-05	0	0.000256794	0.00380912	0.000299593	0.00132677	0.000427991	0.000941579	0.00363792	0.0242109
d__Bacteria; k__norank_d__Bacteria; p__Firmicutes; c__Clostridia; o__Lachnospirales; f__Lachnospiraceae; g__ASF356; s__uncultured_bacterium_g__ASF356; OTU352	8.55981e-05	0.000171196	large intestinal graft	4.27991e-05	0.000984378	0.00175476	8.55981e-05	0.00243955	0.000556388	0	4.27991e-05	0.000342392	0	0	4.27991e-05	4.27991e-05	0.00419431	0.00047079	0.00243955	0.0180184	0.000299593	0.0164987
d__Bacteria; k__norank_d__Bacteria; p__Firmicutes; c__Clostridia; o__Lachnospirales; f__Lachnospiraceae; g__Lachnoclostridium; s__unclassified_g__Lachnoclostridium; OTU147	4.27991e-05	0.000641986	large intestinal graft	0.00047079	0.00243955	0.000299593	0.0199872	0.00136957	4.27991e-05	8.55981e-05	0	4.27991e-05	4.27991e-05	0	4.27991e-05	0.00124117	0.000213995	0.00145517	0.00047079	0.00136957	0.000984378	0.00680939
d__Bacteria; k__norank_d__Bacteria; p__Bacteroidota; c__Bacteroidia; o__Bacteroidales; f__Bacteroidaceae; g__Bacteroides; s__unclassified_g__Bacteroides; OTU319	0	0.000513589	large intestinal graft	0.00162636	0.000556388	0.000855981	0.000128397	0.00487909	0.00612027	0	0	0.000128397	0	0	0	0.000770383	0.00333833	0.00834582	0.000855981	0.00132677	0.000641986	0.0034336
d__Bacteria; k__norank_d__Bacteria; p__Firmicutes; c__Clostridia; o__Lachnospirales; f__Lachnospiraceae; g__norank_f__Lachnospiraceae; s__Clostridium_sp._Culture-27; OTU734	4.27991e-05	0.00047079	large intestinal graft	4.27991e-05	0.000684785	0.000213995	0.000770383	0.00047079	0.000984378	8.55981e-05	0	0	0	0	0	0	0.00102718	0.00286754	0.00389471	0.0150653	0.000342392	0.0083001
d__Bacteria; k__norank_d__Bacteria; p__Bacteroidota; c__Bacteroidia; o__Bacteroidales; f__Muribaculaceae; g__norank_f__Muribaculaceae; s__uncultured_bacterium_g__norank_f__Muribaculaceae; OTU488	0	0.00406591	large intestinal graft	0.000342392	0.00145517	0.00158357	8.55981e-05	4.27991e-05	0.00201156	0	0.00047079	0.000256794	4.27991e-05	0	0	0.00787503	0.00171196	8.55981e-05	0.000171196	0.00141237	0.00483629	0.0358256
d__Bacteria; k__norank_d__Bacteria; p__Bacteroidota; c__Bacteroidia; o__Bacteroidales; f__Rikenellaceae; g__Alistipes; s__uncultured_bacterium_g__Alistipes; OTU648	0	0.0090306	large intestinal graft	0.000813182	0.00149797	0.000256794	0.000128397	0.000641986	0.00106998	0	0	0.000171196	0	0	0	0.00231115	0.00243955	0.00102718	0.00128397	0.00235395	0.00338113	0.000987219
d__Bacteria; k__norank_d__Bacteria; p__Firmicutes; c__Clostridia; o__Lachnospirales; f__Lachnospiraceae; g__norank_f__Lachnospiraceae; s__uncultured_bacterium_g__norank_f__Lachnospiraceae; OTU252	0	0.00248235	large intestinal graft	0.000641986	0.00102718	0.000342392	0.000770383	0.00295314	0.000342392	4.27991e-05	0	0	0	8.55981e-05	0	0.000128397	0.00654826	0.000256794	0.00106998	0.00804622	0.00145517	0.00289688
d__Bacteria; k__norank_d__Bacteria; p__Firmicutes; c__Clostridia; o__Peptococcales; f__Peptococcaceae; g__norank_f__Peptococcaceae; s__uncultured_bacterium_g__norank_f__Peptococcaceae; OTU196	0	0.00222555	large intestinal graft	0.00291034	0.00188316	0.000385192	0.000256794	0.00188316	0.00213995	8.55981e-05	0.000513589	8.55981e-05	0	0	0	0.000727584	0.000941579	0.00145517	0.00235395	0.00552108	0.00136957	0.00594442
d__Bacteria; k__norank_d__Bacteria; p__Firmicutes; c__Clostridia; o__Oscillospirales; f__Oscillospiraceae; g__Colidextribacter; s__uncultured_bacterium_g__Colidextribacter; OTU462	0	0.00196876	large intestinal graft	0.0047079	0.00239675	0.000256794	0.00158357	0.000556388	0.0045367	0	4.27991e-05	0.000171196	0	0	0	0.00132677	0.000385192	0.000684785	0.00111278	0.000299593	0.00166916	0.00239824
d__Bacteria; k__norank_d__Bacteria; p__Firmicutes; c__Clostridia; o__Oscillospirales; f__Butyricicoccaceae; g__Butyricicoccus; s__uncultured_bacterium_g__Butyricicoccus; OTU4	0	0.000171196	large intestinal graft	0.00171196	0.000813182	0.000556388	0.00047079	0.00286754	0.000427991	0.00047079	0.000256794	0	4.27991e-05	0	0	0.000128397	0.00102718	0.00089878	0.00363792	0.00701905	8.55981e-05	0.0164981
d__Bacteria; k__norank_d__Bacteria; p__Firmicutes; c__Clostridia; o__Oscillospirales; f__Ruminococcaceae; g__norank_f__Ruminococcaceae; s__Acutalibacter_muris; OTU173	0	0.000171196	large intestinal graft	0.000427991	0.000641986	0.000427991	0.000128397	0.00582067	0.000813182	0.000171196	0.000171196	0.000171196	4.27991e-05	8.55981e-05	0	0.000128397	0.000641986	0.0044939	0.00338113	0.00184036	0.00047079	0.0170716
d__Bacteria; k__norank_d__Bacteria; p__Firmicutes; c__Clostridia; o__Oscillospirales; f__Oscillospiraceae; g__Oscillibacter; s__uncultured_bacterium_g__Oscillibacter; OTU289	0	0.00218275	large intestinal graft	0.00243955	0.00346672	0.000984378	0.000256794	4.27991e-05	0.000513589	4.27991e-05	0	0	8.55981e-05	0	0	0.00175476	0.00089878	0.000641986	0.00128397	0.0045795	0.000599187	0.00418644
d__Bacteria; k__norank_d__Bacteria; p__Firmicutes; c__Clostridia; o__Oscillospirales; f__Oscillospiraceae; g__unclassified_f__Oscillospiraceae; s__unclassified_f__Oscillospiraceae; OTU56	0	0.000599187	large intestinal graft	0.00308153	0.00106998	0.000599187	0.00132677	0.000770383	0.00620586	4.27991e-05	0.000128397	0.000256794	0	0	4.27991e-05	0.000684785	0.000299593	0.000855981	0.00179756	0.000941579	0.000599187	0.00218598
d__Bacteria; k__norank_d__Bacteria; p__Bacteroidota; c__Bacteroidia; o__Bacteroidales; f__Rikenellaceae; g__Alistipes; s__uncultured_bacterium_g__Alistipes; OTU58	0	0.00243955	large intestinal graft	0.00184036	0.00248235	0.00299593	0	0	0.000684785	0	0	0	0	8.55981e-05	0	0.00136957	0.000128397	4.27991e-05	0.00184036	0.00106998	0.00376632	0.022838
d__Bacteria; k__norank_d__Bacteria; p__Firmicutes; c__Clostridia; o__Lachnospirales; f__Lachnospiraceae; g__norank_f__Lachnospiraceae; s__unclassified_g__norank_f__Lachnospiraceae; OTU413	0	0.00149797	large intestinal graft	0.00089878	0.000770383	0.000385192	0.00162636	0.000256794	0.000171196	0.000342392	0.000427991	0	0.000641986	0	4.27991e-05	0.00047079	0.00346672	0.00089878	0.00196876	0.00188316	0.000128397	0.0468685
d__Bacteria; k__norank_d__Bacteria; p__Firmicutes; c__Clostridia; o__Oscillospirales; f__Ruminococcaceae; g__norank_f__Ruminococcaceae; s__uncultured_bacterium_g__norank_f__Ruminococcaceae; OTU403	0	8.55981e-05	large intestinal graft	0.000299593	0.00047079	0.000256794	0.000513589	4.27991e-05	0.000213995	8.55981e-05	4.27991e-05	0	0	0.000171196	4.27991e-05	0	0.00102718	0.00149797	0.00962979	0.00119837	8.55981e-05	0.0379451
d__Bacteria; k__norank_d__Bacteria; p__Bacteroidota; c__Bacteroidia; o__Bacteroidales; f__Muribaculaceae; g__norank_f__Muribaculaceae; s__uncultured_bacterium_g__norank_f__Muribaculaceae; OTU73	0	4.27991e-05	large intestinal graft	0.00487909	0.00885941	0	0.000299593	0	0.00124117	0	0	0	0	0	0	0.000171196	0	0	0	0	0.000128397	0.0327696
d__Bacteria; k__norank_d__Bacteria; p__Firmicutes; c__Clostridia; o__Lachnospirales; f__Lachnospiraceae; g__Lachnospiraceae_NK4A136_group; s__Lachnospiraceae_bacterium_COE1; OTU334	0	0.000128397	large intestinal graft	0.000256794	0.000213995	0.000684785	0.000385192	0	0.000427991	0	0	0	4.27991e-05	0	0	0.000171196	4.27991e-05	0.000684785	0	0.0122833	0	0.0406669
d__Bacteria; k__norank_d__Bacteria; p__Firmicutes; c__Clostridia; o__Oscillospirales; f__Ruminococcaceae; g__norank_f__Ruminococcaceae; s__unclassified_g__norank_f__Ruminococcaceae; OTU454	0	0.000684785	large intestinal graft	0.000727584	0.000813182	0	0.000770383	0.00111278	0.000427991	0.000299593	8.55981e-05	4.27991e-05	4.27991e-05	0	0.000342392	0.00047079	0.00278194	0.000813182	0.00329553	0.00179756	0.000213995	0.016984
d__Bacteria; k__norank_d__Bacteria; p__Firmicutes; c__Clostridia; o__Lachnospirales; f__Lachnospiraceae; g__unclassified_f__Lachnospiraceae; s__unclassified_f__Lachnospiraceae; OTU223	0	8.55981e-05	large intestinal graft	0.0092446	0.000727584	8.55981e-05	0.000641986	0.000385192	0.00273914	0	0	8.55981e-05	0	0	0	4.27991e-05	0	0.000256794	8.55981e-05	0	0	0.00288459
d__Bacteria; k__norank_d__Bacteria; p__Firmicutes; c__Clostridia; o__Oscillospirales; f__Ruminococcaceae; g__Anaerotruncus; s__uncultured_bacterium_g__Anaerotruncus; OTU280	0	0.000427991	large intestinal graft	0.000171196	0.000684785	0	0.00111278	8.55981e-05	0.000513589	0	4.27991e-05	0	0	8.55981e-05	0	4.27991e-05	0.00676225	0.000213995	0.00179756	0.00222555	8.55981e-05	0.015124
d__Bacteria; k__norank_d__Bacteria; p__Firmicutes; c__Clostridia; o__Lachnospirales; f__Lachnospiraceae; g__Lachnoclostridium; s__unclassified_g__Lachnoclostridium; OTU491	0	0.00479349	large intestinal graft	4.27991e-05	0.000128397	0.000171196	8.55981e-05	0.000813182	4.27991e-05	0	0	0	0	0	4.27991e-05	0.000213995	0.000984378	0.00102718	0.000513589	0.000813182	0.0045367	0.000865833
d__Bacteria; k__norank_d__Bacteria; p__Bacteroidota; c__Bacteroidia; o__Bacteroidales; f__Muribaculaceae; g__norank_f__Muribaculaceae; s__uncultured_bacterium_g__norank_f__Muribaculaceae; OTU159	0	0.000299593	large intestinal graft	0.000855981	0.00136957	0	0.00843141	0	0.00243955	0	0	0	0	0	0	0.000128397	0	0	0	0	0.000684785	0.0327696
d__Bacteria; k__norank_d__Bacteria; p__Firmicutes; c__Clostridia; o__Oscillospirales; f__Oscillospiraceae; g__Oscillibacter; s__uncultured_bacterium_g__Oscillibacter; OTU348	0	8.55981e-05	large intestinal graft	0.000213995	0.000641986	0.000128397	8.55981e-05	0.00106998	0.000128397	4.27991e-05	0	4.27991e-05	0	0	0	4.27991e-05	0.000556388	0.00106998	0.00483629	0.00479349	0.000128397	0.00359078
d__Bacteria; k__norank_d__Bacteria; p__Firmicutes; c__Clostridia; o__Lachnospirales; f__Lachnospiraceae; g__GCA-900066575; s__uncultured_bacterium_g__GCA-900066575; OTU100	0	0.000984378	large intestinal graft	0.00205435	0.00346672	0.000299593	0.00124117	0.00128397	0.000556388	0	8.55981e-05	0	4.27991e-05	0	0	0.000299593	0.000128397	0.00222555	8.55981e-05	0.000556388	0.000427991	0.00197867
d__Bacteria; k__norank_d__Bacteria; p__Bacteroidota; c__Bacteroidia; o__Bacteroidales; f__Muribaculaceae; g__norank_f__Muribaculaceae; s__uncultured_bacterium_g__norank_f__Muribaculaceae; OTU273	0	0.000213995	large intestinal graft	0.000256794	0.000385192	0.00089878	0	0.000128397	8.55981e-05	0	0	0	0	0	4.27991e-05	0.000599187	0.00714744	0.000256794	4.27991e-05	0.00291034	0.000385192	0.00538648
d__Bacteria; k__norank_d__Bacteria; p__Firmicutes; c__Clostridia; o__Lachnospirales; f__Lachnospiraceae; g__A2; s__uncultured_bacterium_g__A2; OTU417	0	4.27991e-05	large intestinal graft	0	0.000813182	0	0.000213995	4.27991e-05	4.27991e-05	0	0	0	0	0	0	0	0	0.000128397	0.00047079	0.010443	4.27991e-05	0.0455779
d__Bacteria; k__norank_d__Bacteria; p__Desulfobacterota; c__Desulfovibrionia; o__Desulfovibrionales; f__Desulfovibrionaceae; g__Bilophila; s__uncultured_bacterium_g__Bilophila; OTU229	0	0.00226835	large intestinal graft	0.00132677	0.00145517	8.55981e-05	0	0.000213995	0.000984378	0.000427991	0	0	0	0.000128397	4.27991e-05	0.00158357	0.000213995	0.000770383	0.00141237	0.000213995	0.000984378	0.0320426
d__Bacteria; k__norank_d__Bacteria; p__Bacteroidota; c__Bacteroidia; o__Bacteroidales; f__Muribaculaceae; g__norank_f__Muribaculaceae; s__uncultured_bacterium_g__norank_f__Muribaculaceae; OTU74	0	0.000684785	large intestinal graft	0.00312433	0.00286754	0	0.000342392	0	0.00265354	0	0	0	0	0	0	0.000385192	0	0	0	0	0.00136957	0.0488007
d__Bacteria; k__norank_d__Bacteria; p__Firmicutes; c__Clostridia; o__Oscillospirales; f__Oscillospiraceae; g__Colidextribacter; s__uncultured_bacterium_g__Colidextribacter; OTU21	0	0.00047079	large intestinal graft	0.00269634	0.000684785	0.000427991	0.000427991	0.00102718	0.000427991	4.27991e-05	0.000342392	4.27991e-05	8.55981e-05	0	4.27991e-05	0.00047079	0.000770383	0.00102718	0.000984378	0.00115557	0.000213995	0.00431013
d__Bacteria; k__norank_d__Bacteria; p__Bacteroidota; c__Bacteroidia; o__Bacteroidales; f__Tannerellaceae; g__Parabacteroides; s__uncultured_Bacteroidales_bacterium_g__Parabacteroides; OTU646	0	0.0045795	large intestinal graft	0	0	0	0	0	0	0	0.000171196	4.27991e-05	0	0	0	0.00128397	0.000171196	0.000342392	0	0.000128397	0.0045795	0.00914017
d__Bacteria; k__norank_d__Bacteria; p__Bacteroidota; c__Bacteroidia; o__Bacteroidales; f__Muribaculaceae; g__norank_f__Muribaculaceae; s__uncultured_bacterium_g__norank_f__Muribaculaceae; OTU70	0	4.27991e-05	large intestinal graft	0.00359512	0.00564948	0	0.000256794	0	0.000984378	0	0	0	0	0	0	0	0	0	0	0	4.27991e-05	0.0216911
d__Bacteria; k__norank_d__Bacteria; p__Bacteroidota; c__Bacteroidia; o__Bacteroidales; f__Bacteroidaceae; g__Bacteroides; s__Bacteroides_caecimuris; OTU649	0	0.00269634	large intestinal graft	0.000128397	0.000171196	0.000171196	4.27991e-05	0.000684785	0.00179756	0	0	0.000342392	0	0	8.55981e-05	0.000385192	0.000599187	0.000342392	0.000171196	8.55981e-05	0.00162636	0.0275579
d__Bacteria; k__norank_d__Bacteria; p__Bacteroidota; c__Bacteroidia; o__Bacteroidales; f__Muribaculaceae; g__norank_f__Muribaculaceae; s__uncultured_bacterium_g__norank_f__Muribaculaceae; OTU51	0	0.000213995	large intestinal graft	0.00243955	0.00252514	0	0.000256794	0	0.00261074	0	0	0	0	0	0	0.000256794	0	0	0	0	0.000941579	0.0442494
d__Bacteria; k__norank_d__Bacteria; p__Bacteroidota; c__Bacteroidia; o__Bacteroidales; f__Muribaculaceae; g__norank_f__Muribaculaceae; s__uncultured_bacterium_g__norank_f__Muribaculaceae; OTU265	0	4.27991e-05	large intestinal graft	0.000128397	0.000171196	0.00047079	0	4.27991e-05	4.27991e-05	0	4.27991e-05	4.27991e-05	0	0	4.27991e-05	0.000385192	0.00586347	8.55981e-05	4.27991e-05	0.00162636	0.000128397	0.0177107
d__Bacteria; k__norank_d__Bacteria; p__Bacteroidota; c__Bacteroidia; o__Bacteroidales; f__Muribaculaceae; g__norank_f__Muribaculaceae; s__uncultured_bacterium_g__norank_f__Muribaculaceae; OTU396	0	0.000256794	large intestinal graft	4.27991e-05	0.000256794	0.000213995	0	8.55981e-05	4.27991e-05	0	0	0	0	0	0	0.000556388	0.0043655	0.000299593	4.27991e-05	0.00231115	0.000427991	0.00137501
d__Bacteria; k__norank_d__Bacteria; p__Bacteroidota; c__Bacteroidia; o__Bacteroidales; f__Muribaculaceae; g__norank_f__Muribaculaceae; s__uncultured_Bacteroidales_bacterium_g__norank_f__Muribaculaceae; OTU254	0	4.27991e-05	large intestinal graft	0	0	0.000171196	0	0.000256794	0	0	0	0.000256794	0	0	0	8.55981e-05	0.00607747	4.27991e-05	0.000984378	0.000770383	4.27991e-05	0.0231687
d__Bacteria; k__norank_d__Bacteria; p__Bacteroidota; c__Bacteroidia; o__Bacteroidales; f__Muribaculaceae; g__norank_f__Muribaculaceae; s__unclassified_g__norank_f__Muribaculaceae; OTU259	0	0.000128397	large intestinal graft	0	0.000128397	0.000171196	0	0	8.55981e-05	0	4.27991e-05	0.000128397	0	0	0	0.000427991	0.0044511	0.000256794	8.55981e-05	0.00184036	0.000385192	0.00610244
d__Bacteria; k__norank_d__Bacteria; p__Bacteroidota; c__Bacteroidia; o__Bacteroidales; f__Muribaculaceae; g__norank_f__Muribaculaceae; s__uncultured_bacterium_g__norank_f__Muribaculaceae; OTU65	0	0.000128397	large intestinal graft	0.00316713	0.00308153	0.000342392	4.27991e-05	0.000171196	0.000427991	0	8.55981e-05	8.55981e-05	4.27991e-05	0	0.000128397	0	4.27991e-05	0.000128397	0	0.000128397	8.55981e-05	0.0226465
d__Bacteria; k__norank_d__Bacteria; p__Bacteroidota; c__Bacteroidia; o__Bacteroidales; f__Muribaculaceae; g__norank_f__Muribaculaceae; s__uncultured_bacterium_g__norank_f__Muribaculaceae; OTU402	0	0.000599187	large intestinal graft	0.000342392	0.000941579	0.00128397	0	4.27991e-05	0.000342392	0	8.55981e-05	4.27991e-05	0	0	4.27991e-05	0.000342392	0.00124117	0.000213995	8.55981e-05	0.000599187	0.00175476	0.0173416
d__Bacteria; k__norank_d__Bacteria; p__Firmicutes; c__Clostridia; o__Lachnospirales; f__Lachnospiraceae; g__Lachnospiraceae_FCS020_group; s__uncultured_bacterium_g__Lachnospiraceae_FCS020_group; OTU330	0	0.00047079	large intestinal graft	0.00102718	0.000770383	8.55981e-05	0.000641986	0.000385192	0.000213995	8.55981e-05	0	8.55981e-05	0	0	0	0.000342392	0.000128397	0.00124117	0.000984378	0.000556388	0.000855981	0.0038039
d__Bacteria; k__norank_d__Bacteria; p__Firmicutes; c__Clostridia; o__Oscillospirales; f__Oscillospiraceae; g__norank_f__Oscillospiraceae; s__unclassified_g__norank_f__Oscillospiraceae; OTU19	0	0.00047079	large intestinal graft	0.00111278	0.000256794	0.000171196	0.00166916	0.00102718	0.000513589	0	0	0.000171196	0	0	0	0	4.27991e-05	0.000984378	0.000171196	0.000299593	0.000727584	0.00614336
d__Bacteria; k__norank_d__Bacteria; p__Firmicutes; c__Clostridia; o__Lachnospirales; f__Lachnospiraceae; g__unclassified_f__Lachnospiraceae; s__unclassified_f__Lachnospiraceae; OTU164	0	4.27991e-05	large intestinal graft	0	0	0	0.000171196	0.00269634	4.27991e-05	0	0	0	0	0	0	0	4.27991e-05	0.000385192	0.000427991	0.00372352	4.27991e-05	0.0247416
d__Bacteria; k__norank_d__Bacteria; p__Bacteroidota; c__Bacteroidia; o__Bacteroidales; f__Muribaculaceae; g__norank_f__Muribaculaceae; s__uncultured_bacterium_g__norank_f__Muribaculaceae; OTU157	0	0.000641986	large intestinal graft	0.000684785	0.000599187	0	0.00115557	0	0.00376632	0	0	0	0	0	0	4.27991e-05	0	0	0	0	0.000684785	0.0442494
d__Bacteria; k__norank_d__Bacteria; p__Firmicutes; c__Clostridia; o__Lachnospirales; f__Lachnospiraceae; g__unclassified_f__Lachnospiraceae; s__unclassified_f__Lachnospiraceae; OTU283	0	0.000342392	large intestinal graft	4.27991e-05	0.000342392	0	0.000171196	0.000427991	0.000171196	0	4.27991e-05	0	0.000128397	0	0	0.000213995	0.00359512	0.000770383	0.000385192	0.000213995	0.000213995	0.00485062
d__Bacteria; k__norank_d__Bacteria; p__Bacteroidota; c__Bacteroidia; o__Bacteroidales; f__Muribaculaceae; g__norank_f__Muribaculaceae; s__uncultured_bacterium_g__norank_f__Muribaculaceae; OTU256	0	0.000256794	large intestinal graft	4.27991e-05	0	0.000128397	0	4.27991e-05	0	0	0	0.000427991	0	0	0	0.00171196	0.00162636	0.000256794	0.000385192	0.000813182	0.000427991	0.00421406
d__Bacteria; k__norank_d__Bacteria; p__Firmicutes; c__Clostridia; o__Peptostreptococcales-Tissierellales; f__Anaerovoracaceae; g__Family_XIII_UCG-001; s__uncultured_bacterium_g__Family_XIII_UCG-001; OTU345	0	0.000171196	large intestinal graft	0.000342392	0.000128397	8.55981e-05	0.00184036	0.000984378	0.000213995	0	0.000342392	0	8.55981e-05	4.27991e-05	0	0.000128397	8.55981e-05	0.000213995	0.000427991	0.000684785	0.000299593	0.0333831
d__Bacteria; k__norank_d__Bacteria; p__Bacteroidota; c__Bacteroidia; o__Bacteroidales; f__unclassified_o__Bacteroidales; g__unclassified_o__Bacteroidales; s__unclassified_o__Bacteroidales; OTU637	0	4.27991e-05	large intestinal graft	4.27991e-05	0	0.000256794	0	4.27991e-05	4.27991e-05	0	0	0.000213995	0	0	0	4.27991e-05	0.0045795	0.000256794	0.000385192	8.55981e-05	4.27991e-05	0.0192579
d__Bacteria; k__norank_d__Bacteria; p__Firmicutes; c__Clostridia; o__unclassified_c__Clostridia; f__unclassified_c__Clostridia; g__unclassified_c__Clostridia; s__unclassified_c__Clostridia; OTU438	0	4.27991e-05	large intestinal graft	0	0.000171196	4.27991e-05	0.000128397	0.000256794	4.27991e-05	0	0	0	0	0	0	0	0.000684785	4.27991e-05	0.00124117	0.00316713	0	0.0251812
d__Bacteria; k__norank_d__Bacteria; p__Bacteroidota; c__Bacteroidia; o__Bacteroidales; f__Muribaculaceae; g__norank_f__Muribaculaceae; s__uncultured_bacterium_g__norank_f__Muribaculaceae; OTU261	0	8.55981e-05	large intestinal graft	0	0	0.000342392	0	0.000128397	0	0	0	0.00111278	0	0	0	0.000727584	0.00231115	8.55981e-05	0.000641986	8.55981e-05	0.000171196	0.0328862
d__Bacteria; k__norank_d__Bacteria; p__Bacteroidota; c__Bacteroidia; o__Bacteroidales; f__Muribaculaceae; g__norank_f__Muribaculaceae; s__uncultured_bacterium_g__norank_f__Muribaculaceae; OTU386	0	0.000213995	large intestinal graft	8.55981e-05	0.000213995	0.000342392	0	4.27991e-05	4.27991e-05	0	0	0	0	0	0	0.000342392	0.00303873	4.27991e-05	4.27991e-05	0.000684785	0.000342392	0.00289967
d__Bacteria; k__norank_d__Bacteria; p__Firmicutes; c__Clostridia; o__Peptostreptococcales-Tissierellales; f__Anaerovoracaceae; g__Eubacterium_nodatum_group; s__unclassified_g__Eubacterium_nodatum_group; OTU518	0	0.000641986	large intestinal graft	0.000684785	0.000171196	0.000342392	8.55981e-05	0	0.000171196	0	8.55981e-05	8.55981e-05	0	0	0	0.000855981	0.000641986	0.000299593	4.27991e-05	0.000128397	0.000385192	0.0175992
d__Bacteria; k__norank_d__Bacteria; p__Deferribacterota; c__Deferribacteres; o__Deferribacterales; f__Deferribacteraceae; g__Mucispirillum; s__Mucispirillum_schaedleri; OTU366	0	4.27991e-05	large intestinal graft	0	4.27991e-05	0	0	8.55981e-05	0	0	0	0	0	0	0	4.27991e-05	8.55981e-05	0.000213995	0.00171196	0.00239675	0	0.0103135
d__Bacteria; k__norank_d__Bacteria; p__Firmicutes; c__Clostridia; o__Oscillospirales; f__Ruminococcaceae; g__norank_f__Ruminococcaceae; s__Clostridium_leptum_g__norank; OTU423	0	4.27991e-05	large intestinal graft	0.000128397	0.000213995	0.000128397	0.000256794	0.000256794	4.27991e-05	0	4.27991e-05	0	0	0	0	4.27991e-05	0.000727584	0.000813182	0.000256794	0.00145517	4.27991e-05	0.00363694
d__Bacteria; k__norank_d__Bacteria; p__Bacteroidota; c__Bacteroidia; o__Bacteroidales; f__Muribaculaceae; g__norank_f__Muribaculaceae; s__unclassified_g__norank_f__Muribaculaceae; OTU471	0	0.000213995	large intestinal graft	0.000513589	0.000342392	0	0	0.000171196	0.000427991	0	0	4.27991e-05	0	0	8.55981e-05	0.000556388	0.000299593	0.000128397	8.55981e-05	0.000385192	0.000941579	0.0200429
d__Bacteria; k__norank_d__Bacteria; p__Bacteroidota; c__Bacteroidia; o__Bacteroidales; f__Muribaculaceae; g__norank_f__Muribaculaceae; s__uncultured_bacterium_g__norank_f__Muribaculaceae; OTU279	0	0.000427991	large intestinal graft	8.55981e-05	0.000770383	0.000299593	0	4.27991e-05	0.000213995	0	0	0.000299593	0	0	0	0.000256794	0.000684785	8.55981e-05	0.000342392	0.000256794	0.000427991	0.0263774
d__Bacteria; k__norank_d__Bacteria; p__Bacteroidota; c__Bacteroidia; o__Bacteroidales; f__Rikenellaceae; g__Alistipes; s__Alistipes_finegoldii; OTU115	0	0.000299593	large intestinal graft	0.000128397	0.000171196	0.00141237	0	0.000513589	8.55981e-05	0	0	4.27991e-05	0	0	0	8.55981e-05	0.000171196	0.000171196	0.000213995	0.000556388	8.55981e-05	0.00749081
d__Bacteria; k__norank_d__Bacteria; p__Bacteroidota; c__Bacteroidia; o__Bacteroidales; f__Rikenellaceae; g__Rikenella; s__uncultured_bacterium_g__Rikenella; OTU270	0	0.000855981	large intestinal graft	0	0	0	0	0.000128397	0	4.27991e-05	0	0	0	0	0	0.000171196	0.000171196	0	0	0.000213995	0.00213995	0.0488888
d__Bacteria; k__norank_d__Bacteria; p__Firmicutes; c__Clostridia; o__Oscillospirales; f__Oscillospiraceae; g__Oscillibacter; s__uncultured_bacterium_g__Oscillibacter; OTU383	4.27991e-05	0.000213995	large intestinal graft	0.000171196	0.000213995	0	0	0.000128397	0.000128397	0	0	0	0	0	0	0.000513589	0.000299593	0.000342392	0.000941579	0.000299593	0.000213995	0.000878975
d__Bacteria; k__norank_d__Bacteria; p__Firmicutes; c__Clostridia; o__Oscillospirales; f__Oscillospiraceae; g__Oscillibacter; s__uncultured_bacterium_g__Oscillibacter; OTU331	0	8.55981e-05	large intestinal graft	0.000171196	0.000385192	0	4.27991e-05	4.27991e-05	4.27991e-05	8.55981e-05	4.27991e-05	0	0	0	0	0.000256794	4.27991e-05	0.000513589	0.000599187	0.000941579	0.000213995	0.0095224
d__Bacteria; k__norank_d__Bacteria; p__Bacteroidota; c__Bacteroidia; o__Flavobacteriales; f__Flavobacteriaceae; g__norank_f__Flavobacteriaceae; s__gut_metagenome_g__norank_f__Flavobacteriaceae; OTU433	0	0.000128397	large intestinal graft	0	0	0.000770383	0	8.55981e-05	0	0	0	8.55981e-05	0	0	0	4.27991e-05	8.55981e-05	0.000556388	0.000513589	0.000941579	0.000128397	0.0152281
d__Bacteria; k__norank_d__Bacteria; p__Bacteroidota; c__Bacteroidia; o__Bacteroidales; f__Muribaculaceae; g__norank_f__Muribaculaceae; s__uncultured_bacterium_g__norank_f__Muribaculaceae; OTU2	0	0.000128397	large intestinal graft	0.000385192	0.000128397	4.27991e-05	0	8.55981e-05	4.27991e-05	0	0	0.000128397	0	0	0	0	0.000641986	4.27991e-05	0.000813182	0.000641986	0.000171196	0.0372174
d__Bacteria; k__norank_d__Bacteria; p__Firmicutes; c__Clostridia; o__Lachnospirales; f__Lachnospiraceae; g__A2; s__uncultured_bacterium_g__A2; OTU152	0	4.27991e-05	large intestinal graft	4.27991e-05	4.27991e-05	4.27991e-05	0.000684785	0.00047079	0	0	0	0	0	0	0	0	0	4.27991e-05	0.00132677	0.000256794	0.000256794	0.0241313
d__Bacteria; k__norank_d__Bacteria; p__Bacteroidota; c__Bacteroidia; o__Bacteroidales; f__Muribaculaceae; g__norank_f__Muribaculaceae; s__uncultured_bacterium_g__norank_f__Muribaculaceae; OTU50	0	8.55981e-05	large intestinal graft	0.00089878	0.00124117	0.000342392	0	4.27991e-05	0.000128397	0	0	0	0	0	0	0	0	0.000128397	0.000128397	0	8.55981e-05	0.0155022
d__Bacteria; k__norank_d__Bacteria; p__Firmicutes; c__Clostridia; o__Oscillospirales; f__Butyricicoccaceae; g__UCG-009; s__unclassified_g__UCG-009; OTU332	0	0.000213995	large intestinal graft	0.00047079	0.000385192	8.55981e-05	0	0.000299593	0	0	0	0	0	0	0	0.000171196	0.000128397	0.000256794	0.000299593	0.00047079	0.000171196	0.0103784
d__Bacteria; k__norank_d__Bacteria; p__Bacteroidota; c__Bacteroidia; o__Bacteroidales; f__Marinifilaceae; g__Butyricimonas; s__uncultured_bacterium_g__Butyricimonas; OTU246	0	0.00162636	large intestinal graft	0	0	4.27991e-05	0	0.000171196	4.27991e-05	0	0	4.27991e-05	0	0	0	0.000213995	0	0.000171196	0.000171196	0.000256794	0.000213995	0.017114
d__Bacteria; k__norank_d__Bacteria; p__Bacteroidota; c__Bacteroidia; o__Bacteroidales; f__Muribaculaceae; g__norank_f__Muribaculaceae; s__unclassified_g__norank_f__Muribaculaceae; OTU62	0	0.000427991	large intestinal graft	4.27991e-05	0.000727584	0	0.00132677	0	0.000171196	0	0	0	0	0	0	4.27991e-05	0	0	0	0	0	0.0248693
d__Bacteria; k__norank_d__Bacteria; p__Firmicutes; c__Clostridia; o__Lachnospirales; f__Lachnospiraceae; g__norank_f__Lachnospiraceae; s__uncultured_bacterium_g__norank_f__Lachnospiraceae; OTU342	0	0.000128397	large intestinal graft	0.000213995	0.000213995	4.27991e-05	0.000855981	8.55981e-05	0.000213995	0	0	0	4.27991e-05	0	0	0.000256794	0	4.27991e-05	0.000299593	0.000213995	0	0.0172335
d__Bacteria; k__norank_d__Bacteria; p__Firmicutes; c__Clostridia; o__Lachnospirales; f__Lachnospiraceae; g__unclassified_f__Lachnospiraceae; s__unclassified_f__Lachnospiraceae; OTU468	0	0.000770383	large intestinal graft	0.000128397	4.27991e-05	0	0	0	4.27991e-05	0	0	0	0	0	0	0.000128397	0.000171196	0.000128397	0	8.55981e-05	0.000941579	0.0105149
d__Bacteria; k__norank_d__Bacteria; p__Firmicutes; c__Bacilli; o__Erysipelotrichales; f__Erysipelatoclostridiaceae; g__Candidatus_Stoquefichus; s__uncultured_bacterium_g__Candidatus_Stoquefichus; OTU463	0	0.000727584	large intestinal graft	0	0	0	0	0	0	0	0	0	0	0	0	0.000256794	8.55981e-05	0	0	0	0.00089878	0.0345016
d__Bacteria; k__norank_d__Bacteria; p__Firmicutes; c__Clostridia; o__Peptostreptococcales-Tissierellales; f__Anaerovoracaceae; g__Eubacterium_brachy_group; s__uncultured_bacterium_g__Eubacterium_brachy_group; OTU509	0	0.000213995	large intestinal graft	0.000213995	4.27991e-05	4.27991e-05	8.55981e-05	4.27991e-05	0.000128397	0	0	0	0	0	4.27991e-05	0.000128397	0.000171196	0.000299593	8.55981e-05	4.27991e-05	0.000385192	0.00304262
d__Bacteria; k__norank_d__Bacteria; p__Firmicutes; c__Clostridia; o__Lachnospirales; f__Lachnospiraceae; g__unclassified_f__Lachnospiraceae; s__unclassified_f__Lachnospiraceae; OTU304	0	8.55981e-05	large intestinal graft	8.55981e-05	0.000128397	0	8.55981e-05	4.27991e-05	4.27991e-05	8.55981e-05	0	0	0	0	0	4.27991e-05	0	0.00047079	0.000299593	0.000256794	0.000299593	0.0300751
d__Bacteria; k__norank_d__Bacteria; p__Firmicutes; c__Clostridia; o__Oscillospirales; f__Ruminococcaceae; g__norank_f__Ruminococcaceae; s__unclassified_g__norank_f__Ruminococcaceae; OTU343	0	4.27991e-05	large intestinal graft	0	8.55981e-05	8.55981e-05	0.000171196	0.000213995	0	0	0	0	0	0	0	4.27991e-05	0	0.000213995	0.000427991	0.000256794	0	0.0433294
d__Bacteria; k__norank_d__Bacteria; p__Firmicutes; c__Clostridia; o__Peptococcales; f__Peptococcaceae; g__norank_f__Peptococcaceae; s__uncultured_bacterium_g__norank_f__Peptococcaceae; OTU36	0	0.000513589	large intestinal graft	4.27991e-05	8.55981e-05	4.27991e-05	0.000128397	0.000128397	4.27991e-05	0	4.27991e-05	4.27991e-05	0	0	0	4.27991e-05	0.000128397	4.27991e-05	0	0	0	0.0335511
d__Bacteria; k__norank_d__Bacteria; p__Bacteroidota; c__Bacteroidia; o__Bacteroidales; f__Muribaculaceae; g__norank_f__Muribaculaceae; s__unclassified_g__norank_f__Muribaculaceae; OTU96	0	4.27991e-05	large intestinal graft	0.000599187	0.000213995	0	0	0	4.27991e-05	0	0	0	0	0	0	4.27991e-05	4.27991e-05	0	8.55981e-05	8.55981e-05	4.27991e-05	0.0381718
d__Bacteria; k__norank_d__Bacteria; p__Bacteroidota; c__Bacteroidia; o__Bacteroidales; f__Marinifilaceae; g__Butyricimonas; s__uncultured_bacterium_g__Butyricimonas; OTU30	0	0.000684785	large intestinal graft	0	0	0	0	0	0	0	0	0	0	0	0	0	0	4.27991e-05	0	4.27991e-05	8.55981e-05	0.0342181
d__Bacteria; k__norank_d__Bacteria; p__Firmicutes; c__Clostridia; o__Lachnospirales; f__Lachnospiraceae; g__Lachnospiraceae_UCG-010; s__uncultured_bacterium_g__Lachnospiraceae_UCG-010; OTU201	0	0.000128397	large intestinal graft	0.000128397	0.000299593	0	0	4.27991e-05	0.000128397	0	0	0	0	0	0	0	0	4.27991e-05	4.27991e-05	0	0	0.0393794
d__Bacteria; k__norank_d__Bacteria; p__Firmicutes; c__Clostridia; o__Oscillospirales; f__Ruminococcaceae; g__Anaerotruncus; s__uncultured_bacterium_g__Anaerotruncus; OTU422	0	8.55981e-05	large intestinal graft	4.27991e-05	4.27991e-05	0	0	0	0	0	0	0	0	0	0	4.27991e-05	8.55981e-05	4.27991e-05	0.000171196	0.000128397	0	0.00981527
d__Bacteria; k__norank_d__Bacteria; p__Firmicutes; c__Clostridia; o__Oscillospirales; f__norank_o__Oscillospirales; g__norank_f__norank_o__Oscillospirales; s__metagenome_g__norank_f__norank_o__Oscillospirales; OTU293	0	8.55981e-05	large intestinal graft	0	0	0	0	0	0	0	0	0	0	0	0	0	4.27991e-05	8.55981e-05	0	4.27991e-05	0	0.0342181
d__Bacteria; k__norank_d__Bacteria; p__Bacteroidota; c__Bacteroidia; o__Bacteroidales; f__Muribaculaceae; g__norank_f__Muribaculaceae; s__unclassified_g__norank_f__Muribaculaceae; OTU566	0	0	detectable neither in small intestinal graft nor in large intestinal graft	0	0	0	0	0	0	0.0160496	0.222812	0	0.185876	0	0.0361652	0	0	0	0	0.00128397	0	0.0216911
d__Bacteria; k__norank_d__Bacteria; p__Bacteroidota; c__Bacteroidia; o__Bacteroidales; f__Muribaculaceae; g__norank_f__Muribaculaceae; s__uncultured_bacterium_g__norank_f__Muribaculaceae; OTU573	0	0		0	0	0	0	0	0	0.00089878	0.072844	0	0.000213995	0	0.00124117	0	0	0	0	0	0	0.00854298
d__Bacteria; k__norank_d__Bacteria; p__Bacteroidota; c__Bacteroidia; o__Bacteroidales; f__Muribaculaceae; g__norank_f__Muribaculaceae; s__uncultured_bacterium_g__norank_f__Muribaculaceae; OTU593	0	0		0	0	0	0	0	0	0.000513589	0.0285042	0	0.0104002	0	0.00885941	0	0	0	0	0	0	0.00854298
d__Bacteria; k__norank_d__Bacteria; p__Bacteroidota; c__Bacteroidia; o__Bacteroidales; f__Muribaculaceae; g__norank_f__Muribaculaceae; s__uncultured_bacterium_g__norank_f__Muribaculaceae; OTU596	0	0		0	0	0	0	0	0	0.00106998	0.018104	0	0.00620586	0	0.00402311	0	0	0	0	0	0	0.00854298
d__Bacteria; k__norank_d__Bacteria; p__Bacteroidota; c__Bacteroidia; o__Bacteroidales; f__Muribaculaceae; g__norank_f__Muribaculaceae; s__uncultured_bacterium_g__norank_f__Muribaculaceae; OTU568	0	0		0	0	0	0	0	0	0.000385192	0.0197304	0	0.00697625	0	0.000128397	0	0	0	0	0	0	0.00854298
d__Bacteria; k__norank_d__Bacteria; p__Firmicutes; c__Clostridia; o__Lachnospirales; f__Lachnospiraceae; g__Lachnospiraceae_NK4A136_group; s__unclassified_g__Lachnospiraceae_NK4A136_group; OTU38	0	0		0.0046651	0.0135245	0	0.00543548	0	0.000770383	0	0	0	0	0	0	0	0	0.000299593	0	0	0	0.0216911
d__Bacteria; k__norank_d__Bacteria; p__Firmicutes; c__Clostridia; o__Lachnospirales; f__Lachnospiraceae; g__unclassified_f__Lachnospiraceae; s__unclassified_f__Lachnospiraceae; OTU296	0	0		0.000513589	0.000941579	0	0.000385192	0.00166916	0.00329553	0.000299593	0	0	0	0	0	0	0.000941579	0.0116413	0.000427991	0.00192596	0	0.0424829
d__Bacteria; k__norank_d__Bacteria; p__Firmicutes; c__Clostridia; o__Oscillospirales; f__Oscillospiraceae; g__norank_f__Oscillospiraceae; s__uncultured_bacterium_g__norank_f__Oscillospiraceae; OTU313	0	0		0.000727584	0.00282474	0.000513589	0.000727584	0.00154077	0.000213995	0.000128397	0.000256794	8.55981e-05	8.55981e-05	0	0	0	0.000385192	0.00119837	0.00513589	0.00291034	4.27991e-05	0.0436962
d__Bacteria; k__norank_d__Bacteria; p__Firmicutes; c__Clostridia; o__Lachnospirales; f__Lachnospiraceae; g__Roseburia; s__uncultured_Clostridiales_bacterium_g__Roseburia; OTU281	0	0		4.27991e-05	0	0	0	0	0	0	0	0	0	0	0	0	0.00402311	4.27991e-05	4.27991e-05	0.0124973	0	0.0280578
d__Bacteria; k__norank_d__Bacteria; p__Bacteroidota; c__Bacteroidia; o__Bacteroidales; f__Muribaculaceae; g__norank_f__Muribaculaceae; s__uncultured_bacterium_g__norank_f__Muribaculaceae; OTU595	0	0		0	0	0	0	0	0	4.27991e-05	0.0159212	0	4.27991e-05	0	0.000256794	0	0	0	0	0	0	0.00846403
d__Bacteria; k__norank_d__Bacteria; p__Bacteroidota; c__Bacteroidia; o__Bacteroidales; f__Muribaculaceae; g__norank_f__Muribaculaceae; s__uncultured_bacterium_g__norank_f__Muribaculaceae; OTU585	0	0		0	0	0	0	0	0	0	0.0102718	0	0.00325273	0	0.000984378	0	0	0	0	0	0	0.0345016
d__Bacteria; k__norank_d__Bacteria; p__Firmicutes; c__Clostridia; o__Oscillospirales; f__Oscillospiraceae; g__norank_f__Oscillospiraceae; s__uncultured_bacterium_g__norank_f__Oscillospiraceae; OTU346	0	0		0.000770383	0.00248235	0.00115557	0.000213995	0.00188316	0	0	8.55981e-05	8.55981e-05	0	0	4.27991e-05	0	0.000727584	0.00106998	0.0046651	0.00115557	8.55981e-05	0.0459156
d__Bacteria; k__norank_d__Bacteria; p__Firmicutes; c__Clostridia; o__Lachnospirales; f__Lachnospiraceae; g__Lachnospiraceae_NK4A136_group; s__uncultured_bacterium_g__Lachnospiraceae_NK4A136_group; OTU86	0	0		0.000342392	0.0133961	0	4.27991e-05	0	0	0	0	0	0	0	0	0	0	0	0	0	0	0.0345016
d__Bacteria; k__norank_d__Bacteria; p__Firmicutes; c__Clostridia; o__Lachnospirales; f__Lachnospiraceae; g__norank_f__Lachnospiraceae; s__uncultured_bacterium_g__norank_f__Lachnospiraceae; OTU425	0	0		8.55981e-05	0.000684785	4.27991e-05	0.000213995	4.27991e-05	0	0	0	0	0	0	0	0	0.00128397	0.00282474	0.00346672	0.00509309	0	0.021158
d__Bacteria; k__norank_d__Bacteria; p__Firmicutes; c__Clostridia; o__Oscillospirales; f__Ruminococcaceae; g__Ruminococcus; s__unclassified_g__Ruminococcus; OTU9	0	0		0.00500749	0.00261074	0.00265354	0.00089878	0	0.00102718	0	0	0	0	0	0	4.27991e-05	0.000299593	0	0.000984378	8.55981e-05	0	0.00770624
d__Bacteria; k__norank_d__Bacteria; p__Firmicutes; c__Clostridia; o__Oscillospirales; f__UCG-010; g__norank_f__UCG-010; s__unclassified_g__norank_f__UCG-010; OTU13	0	0		0.00115557	0.000171196	0.000299593	0.000813182	0.000128397	0.000256794	0	0	0.000299593	0	0	0	0.00166916	0.000128397	0.00179756	0.000427991	0.000513589	0.00273914	0.00659192
d__Bacteria; k__norank_d__Bacteria; p__Firmicutes; c__Clostridia; o__Oscillospirales; f__Oscillospiraceae; g__UCG-005; s__uncultured_Clostridiales_bacterium_g__UCG-005; OTU168	0	0		0.000855981	0.00141237	4.27991e-05	0.00136957	0.000770383	4.27991e-05	0	4.27991e-05	0	0	0	0	0	0.00222555	0.000256794	0.00175476	0.000813182	0	0.0231604
d__Bacteria; k__norank_d__Bacteria; p__Firmicutes; c__Clostridia; o__Oscillospirales; f__Oscillospiraceae; g__norank_f__Oscillospiraceae; s__uncultured_bacterium_g__norank_f__Oscillospiraceae; OTU278	0	0		0	0.000128397	4.27991e-05	4.27991e-05	0.000171196	0	0	0	0	0	0	0	4.27991e-05	0.000684785	0.000770383	0.00363792	0.00402311	0	0.0105308
d__Bacteria; k__norank_d__Bacteria; p__Firmicutes; c__Bacilli; o__Erysipelotrichales; f__Erysipelotrichaceae; g__norank_f__Erysipelotrichaceae; s__uncultured_Allobaculum_sp._g__norank; OTU538	0	0		0	0	0	0	0	0	0.00291034	0.0046223	0	0.00145517	0	0.000171196	0	0	0	0	0	0	0.00854298
d__Bacteria; k__norank_d__Bacteria; p__Firmicutes; c__Clostridia; o__Oscillospirales; f__Ruminococcaceae; g__unclassified_f__Ruminococcaceae; s__unclassified_f__Ruminococcaceae; OTU291	0	0		0	0	4.27991e-05	0	0.00166916	0	0	0	0	0	0	0	0	0.00124117	0.00346672	0.00231115	0.000342392	0	0.0488007
d__Bacteria; k__norank_d__Bacteria; p__Bacteroidota; c__Bacteroidia; o__Bacteroidales; f__Muribaculaceae; g__norank_f__Muribaculaceae; s__uncultured_bacterium_g__norank_f__Muribaculaceae; OTU574	0	0		0	0	0	0	0	0	4.27991e-05	0.00701905	0	0.00166916	0	0	0	0	0	0	0	0	0.0345016
d__Bacteria; k__norank_d__Bacteria; p__Firmicutes; c__Bacilli; o__Lactobacillales; f__Lactobacillaceae; g__Lactobacillus; s__uncultured_bacterium_g__Lactobacillus; OTU560	0	0		0	0	0	0	0	0	0.00774663	4.27991e-05	0	0.000171196	0	0.000213995	0	0	0.000213995	0	0	0	0.0420567
d__Bacteria; k__norank_d__Bacteria; p__Bacteroidota; c__Bacteroidia; o__Bacteroidales; f__Muribaculaceae; g__norank_f__Muribaculaceae; s__uncultured_bacterium_g__norank_f__Muribaculaceae; OTU565	0	0		0	0	0	0	0	0	0	0.00573507	0	0.00205435	0	0.000513589	0	0	0	0	0	0	0.0345016
d__Bacteria; k__norank_d__Bacteria; p__Firmicutes; c__Clostridia; o__Lachnospirales; f__Lachnospiraceae; g__norank_f__Lachnospiraceae; s__uncultured_bacterium_g__norank_f__Lachnospiraceae; OTU364	0	0		0	0.000171196	0	0.00184036	0.000128397	0.000641986	0	4.27991e-05	0	0	0	0	0	0.000855981	0.000128397	0.00286754	0.00132677	8.55981e-05	0.0367769
d__Bacteria; k__norank_d__Bacteria; p__Bacteroidota; c__Bacteroidia; o__Bacteroidales; f__Muribaculaceae; g__norank_f__Muribaculaceae; s__uncultured_bacterium_g__norank_f__Muribaculaceae; OTU104	0	0		0	0	0.00329553	0	0	0	0.000256794	0.00106998	0.000128397	0.000813182	0	0.00243955	0	0	0	0	4.27991e-05	0	0.035563
d__Bacteria; k__norank_d__Bacteria; p__Firmicutes; c__Bacilli; o__unclassified_c__Bacilli; f__unclassified_c__Bacilli; g__unclassified_c__Bacilli; s__unclassified_c__Bacilli; OTU760	0	0		4.27991e-05	0	4.27991e-05	0	0	4.27991e-05	0.000213995	0.00175476	8.55981e-05	0.00047079	0	0.0047507	0	0	0	0	0	0	0.00681631
d__Bacteria; k__norank_d__Bacteria; p__Bacteroidota; c__Bacteroidia; o__Bacteroidales; f__Muribaculaceae; g__norank_f__Muribaculaceae; s__uncultured_bacterium_g__norank_f__Muribaculaceae; OTU587	0	0		0	0	0	0	0	0	0	0.0045795	0	0.00209715	0	0.00047079	0	0	0	0	0	0	0.0345016
d__Bacteria; k__norank_d__Bacteria; p__Firmicutes; c__Clostridia; o__Lachnospirales; f__Lachnospiraceae; g__norank_f__Lachnospiraceae; s__Clostridium_sp._Culture-54; OTU156	0	0		0.000641986	0.00124117	8.55981e-05	0.000427991	0.000556388	8.55981e-05	4.27991e-05	8.55981e-05	0	0	0	0	0.000684785	8.55981e-05	0.00149797	0.000385192	0.000171196	0.00102718	0.00454611
d__Bacteria; k__norank_d__Bacteria; p__Bacteroidota; c__Bacteroidia; o__Bacteroidales; f__Muribaculaceae; g__norank_f__Muribaculaceae; s__uncultured_bacterium_g__norank_f__Muribaculaceae; OTU584	0	0		0	0	0	0	0	0	0.000342392	0.00577787	0	0.000513589	0	0.000171196	0	0	0	0	0	0	0.00854298
d__Bacteria; k__norank_d__Bacteria; p__Firmicutes; c__Clostridia; o__Clostridia_UCG-014; f__norank_o__Clostridia_UCG-014; g__norank_f__norank_o__Clostridia_UCG-014; s__unclassified_g__norank_f__norank_o__Clostridia_UCG-014; OTU678	0	0		0	0	0	0	0	0	0.00154077	0.00047079	0	0.00410871	0	0	0	0	0	0	0	0	0.0345016
d__Bacteria; k__norank_d__Bacteria; p__Firmicutes; c__Clostridia; o__Oscillospirales; f__Oscillospiraceae; g__norank_f__Oscillospiraceae; s__uncultured_bacterium_g__norank_f__Oscillospiraceae; OTU412	0	0		8.55981e-05	0.000171196	0	0	8.55981e-05	0	0	0	0	0	0	0	0	0.000171196	8.55981e-05	0.00286754	0.00243955	0	0.0494591
d__Bacteria; k__norank_d__Bacteria; p__Actinobacteriota; c__Coriobacteriia; o__Coriobacteriales; f__Eggerthellaceae; g__unclassified_f__Eggerthellaceae; s__unclassified_f__Eggerthellaceae; OTU684	0	0		0	0	0	0	0	0	0.0045367	4.27991e-05	0	0.000941579	0	0.000213995	0	4.27991e-05	0	0	0	0	0.0248693
d__Bacteria; k__norank_d__Bacteria; p__Bacteroidota; c__Bacteroidia; o__Bacteroidales; f__Prevotellaceae; g__Prevotellaceae_UCG-001; s__uncultured_Bacteroidales_bacterium_g__Prevotellaceae_UCG-001; OTU579	0	0		0	0	0	0	0	0	0.000599187	0.00342392	0	0.00111278	0	0	0	0	0	0	0	0	0.0345016
d__Bacteria; k__norank_d__Bacteria; p__Bacteroidota; c__Bacteroidia; o__Bacteroidales; f__Muribaculaceae; g__norank_f__Muribaculaceae; s__uncultured_bacterium_g__norank_f__Muribaculaceae; OTU59	0	0		0.00145517	0.00141237	0	0.000813182	0	0.000855981	0	0	0	0	0	0	0	4.27991e-05	0	0	0	0.000213995	0.0327696
d__Bacteria; k__norank_d__Bacteria; p__Proteobacteria; c__Gammaproteobacteria; o__Enterobacterales; f__Morganellaceae; g__Proteus; s__Proteus_mirabilis; OTU712	0	0		0	0	0	0	0	0	0	8.55981e-05	0	0.000299593	0.00423711	8.55981e-05	0	4.27991e-05	0	0	0	0	0.0215539
d__Bacteria; k__norank_d__Bacteria; p__Bacteroidota; c__Bacteroidia; o__Bacteroidales; f__Muribaculaceae; g__norank_f__Muribaculaceae; s__unclassified_g__norank_f__Muribaculaceae; OTU91	0	0		0.000684785	0.00136957	0	0.00179756	0	0.000256794	0	0	0	0	0	0	4.27991e-05	0	0	0	0	0.000427991	0.0403229
d__Bacteria; k__norank_d__Bacteria; p__Firmicutes; c__Clostridia; o__Monoglobales; f__Monoglobaceae; g__Monoglobus; s__uncultured_organism_g__Monoglobus; OTU752	0	0		0	4.27991e-05	0	0.000128397	0	0	0.000256794	0.000213995	0	0.000984378	0	0.00256794	0	0	0	0	0	0	0.0327696
d__Bacteria; k__norank_d__Bacteria; p__Firmicutes; c__Clostridia; o__Lachnospirales; f__Lachnospiraceae; g__norank_f__Lachnospiraceae; s__uncultured_bacterium_g__norank_f__Lachnospiraceae; OTU370	0	0		4.27991e-05	0.000855981	4.27991e-05	8.55981e-05	8.55981e-05	4.27991e-05	0	0	0	0	0	0	0	0.000342392	0.000513589	0.00115557	0.000427991	0	0.0129509
d__Bacteria; k__norank_d__Bacteria; p__Bacteroidota; c__Bacteroidia; o__Bacteroidales; f__Muribaculaceae; g__norank_f__Muribaculaceae; s__unclassified_g__norank_f__Muribaculaceae; OTU311	0	0		0	0	0.000128397	0	4.27991e-05	0	0	0	0.000213995	0	0	0	4.27991e-05	0.00132677	0.000171196	0.00132677	0.000171196	0	0.0463239
d__Bacteria; k__norank_d__Bacteria; p__Bacteroidota; c__Bacteroidia; o__Bacteroidales; f__Muribaculaceae; g__norank_f__Muribaculaceae; s__uncultured_bacterium_g__norank_f__Muribaculaceae; OTU81	0	0		0.000427991	0.000770383	0	0.000342392	0	0.00188316	0	0	0	0	0	0	0	0	0	0	0	0	0.00854298
d__Bacteria; k__norank_d__Bacteria; p__Bacteroidota; c__Bacteroidia; o__Bacteroidales; f__Muribaculaceae; g__norank_f__Muribaculaceae; s__uncultured_bacterium_g__norank_f__Muribaculaceae; OTU286	0	0		0	0	0	0	0	0	0	0	0	0	0	0	0	0.00282474	8.55981e-05	0	0.000427991	0	0.0345016
d__Bacteria; k__norank_d__Bacteria; p__Firmicutes; c__Bacilli; o__Lactobacillales; f__Lactobacillaceae; g__Lactobacillus; s__unclassified_g__Lactobacillus; OTU207	0	0		0	0	0.000171196	0	0	0.000128397	0.000128397	0.00166916	4.27991e-05	0.000342392	0	0.000770383	0	0	0	0	0	0	0.014843
d__Bacteria; k__norank_d__Bacteria; p__Firmicutes; c__Clostridia; o__Clostridia_vadinBB60_group; f__norank_o__Clostridia_vadinBB60_group; g__norank_f__norank_o__Clostridia_vadinBB60_group; s__unclassified_g__norank_f__norank_o__Clostridia_vadinBB60_group; OTU435	0	0		0	0	0	4.27991e-05	0.000299593	0	0	0	0	0	0	0	0	0.000128397	0.00047079	0.000171196	0.00184036	0	0.0488007
d__Bacteria; k__norank_d__Bacteria; p__Firmicutes; c__Clostridia; o__Oscillospirales; f__Ruminococcaceae; g__Harryflintia; s__uncultured_bacterium_g__Harryflintia; OTU394	0	0		8.55981e-05	0.000128397	0	0.000171196	0.000128397	0	0	0	8.55981e-05	0	0	0	4.27991e-05	0.000256794	0.000256794	0.000770383	0.000984378	4.27991e-05	0.0136127
d__Bacteria; k__norank_d__Bacteria; p__Bacteroidota; c__Bacteroidia; o__Bacteroidales; f__Muribaculaceae; g__norank_f__Muribaculaceae; s__uncultured_bacterium_g__norank_f__Muribaculaceae; OTU603	0	0		0	0	0	0	0	0	4.27991e-05	0.00119837	0	0.000770383	0	0.000727584	0	0	0	0	4.27991e-05	0	0.0248693
d__Bacteria; k__norank_d__Bacteria; p__Firmicutes; c__Bacilli; o__Lactobacillales; f__Lactobacillaceae; g__Lactobacillus; s__unclassified_g__Lactobacillus; OTU770	0	0		4.27991e-05	0	0	0	0	0.000171196	0.000342392	0.00089878	0	4.27991e-05	0	0.000941579	0	0	0	0	0	0	0.0442494
d__Bacteria; k__norank_d__Bacteria; p__Firmicutes; c__Clostridia; o__Lachnospirales; f__Lachnospiraceae; g__GCA-900066575; s__uncultured_bacterium_g__GCA-900066575; OTU420	0	0		0.000256794	0.000256794	4.27991e-05	4.27991e-05	0.000171196	8.55981e-05	0	0	0	0	0	0	0	0.000213995	0.000385192	4.27991e-05	0.00047079	0.000256794	0.00578074
d__Bacteria; k__norank_d__Bacteria; p__Firmicutes; c__Clostridia; o__Lachnospirales; f__Lachnospiraceae; g__Ruminococcus_torques_group; s__uncultured_bacterium_g__Ruminococcus_torques_group; OTU673	0	0		0	0	0	0	0	0	0	4.27991e-05	0	0.00184036	4.27991e-05	4.27991e-05	0	0	0	0	0	0	0.00822975
d__Bacteria; k__norank_d__Bacteria; p__Bacteroidota; c__Bacteroidia; o__Bacteroidales; f__Muribaculaceae; g__norank_f__Muribaculaceae; s__uncultured_bacterium_g__norank_f__Muribaculaceae; OTU138	0	0		4.27991e-05	0.000128397	0.00154077	0	0	8.55981e-05	0	0	0	0	0	0	0	0	4.27991e-05	0	0	0	0.0248693
d__Bacteria; k__norank_d__Bacteria; p__Firmicutes; c__Bacilli; o__Staphylococcales; f__Gemellaceae; g__Gemella; s__uncultured_bacterium_g__Gemella; OTU537	0	0		0	0	0	0	0	0	0.00089878	0	0	4.27991e-05	0	0.000813182	0	0	0	0	0	0	0.0345016
d__Bacteria; k__norank_d__Bacteria; p__Bacteroidota; c__Bacteroidia; o__Bacteroidales; f__Muribaculaceae; g__norank_f__Muribaculaceae; s__uncultured_bacterium_g__norank_f__Muribaculaceae; OTU439	0	0		0	0	0	0	0.000171196	0	0	0	0	0	0	0	0	0.000128397	0.000727584	8.55981e-05	0.000641986	0	0.0373432
d__Bacteria; k__norank_d__Bacteria; p__Bacteroidota; c__Bacteroidia; o__Bacteroidales; f__Muribaculaceae; g__norank_f__Muribaculaceae; s__uncultured_bacterium_g__norank_f__Muribaculaceae; OTU606	0	0		0	0	0	0	0	0	4.27991e-05	0.00141237	0	4.27991e-05	0	0.000128397	0	0	0	0	0	0	0.00846403
d__Bacteria; k__norank_d__Bacteria; p__Bacteroidota; c__Bacteroidia; o__Bacteroidales; f__Muribaculaceae; g__norank_f__Muribaculaceae; s__unclassified_g__norank_f__Muribaculaceae; OTU85	0	0		0.000256794	0.000513589	0	0	0	0.000770383	0	0	0	0	0	0	0	0	0	0	0	0	0.0345016
d__Bacteria; k__norank_d__Bacteria; p__Bacteroidota; c__Bacteroidia; o__Bacteroidales; f__unclassified_o__Bacteroidales; g__unclassified_o__Bacteroidales; s__unclassified_o__Bacteroidales; OTU329	0	0		0	0	0	0	0	0	0	0	4.27991e-05	0	0	0	0	0.00111278	0.000256794	4.27991e-05	4.27991e-05	0	0.0280578
d__Bacteria; k__norank_d__Bacteria; p__Actinobacteriota; c__Coriobacteriia; o__Coriobacteriales; f__Eggerthellaceae; g__Enterorhabdus; s__uncultured_bacterium_g__Enterorhabdus; OTU534	0	0		0	0	0	0	0	0	0.00106998	0.000213995	0	0.000213995	0	0	0	0	0	0	0	0	0.0342181
d__Bacteria; k__norank_d__Bacteria; p__Firmicutes; c__Clostridia; o__Lachnospirales; f__Lachnospiraceae; g__unclassified_f__Lachnospiraceae; s__unclassified_f__Lachnospiraceae; OTU485	0	0		0.000299593	4.27991e-05	4.27991e-05	0.000171196	0.000128397	0	0	0	0	0	0	0	8.55981e-05	0.000128397	4.27991e-05	0.000128397	0.000342392	4.27991e-05	0.00537802
d__Bacteria; k__norank_d__Bacteria; p__Bacteroidota; c__Bacteroidia; o__Bacteroidales; f__Muribaculaceae; g__norank_f__Muribaculaceae; s__uncultured_bacterium_g__norank_f__Muribaculaceae; OTU528	0	0		0	0	0	0	0	0	0.000171196	0	0	0.000984378	0	0.000171196	0	0	0	0	0	0	0.0342181
d__Bacteria; k__norank_d__Bacteria; p__Actinobacteriota; c__Coriobacteriia; o__Coriobacteriales; f__Eggerthellaceae; g__Gordonibacter; s__uncultured_bacterium_g__Gordonibacter; OTU670	0	0		0	0	0	0	0	0	0.000641986	4.27991e-05	0	0.000342392	0	0.000256794	0	0	0	0	0	0	0.00854298
d__Bacteria; k__norank_d__Bacteria; p__Firmicutes; c__Bacilli; o__unclassified_c__Bacilli; f__unclassified_c__Bacilli; g__unclassified_c__Bacilli; s__unclassified_c__Bacilli; OTU635	0	0		0	0	0.000171196	0	0	0	0.000299593	0	0.000256794	4.27991e-05	0	0.00047079	0	0	0	0	0	0	0.0287286
d__Bacteria; k__norank_d__Bacteria; p__Bacteroidota; c__Bacteroidia; o__Bacteroidales; f__Muribaculaceae; g__norank_f__Muribaculaceae; s__uncultured_bacterium_g__norank_f__Muribaculaceae; OTU667	0	0		0	0	0	0	0	0	0	0.000984378	0	0.000171196	0	8.55981e-05	0	0	0	0	0	0	0.0345016
d__Bacteria; k__norank_d__Bacteria; p__Bacteroidota; c__Bacteroidia; o__Bacteroidales; f__Marinifilaceae; g__Odoribacter; s__uncultured_bacterium_g__Odoribacter; OTU631	0	0		0	0	0	0	0	0	0	0.000128397	0.000855981	0	0	0.000213995	0	0	0	0	0	0	0.0345016
d__Bacteria; k__norank_d__Bacteria; p__Firmicutes; c__unclassified_p__Firmicutes; o__unclassified_p__Firmicutes; f__unclassified_p__Firmicutes; g__unclassified_p__Firmicutes; s__unclassified_p__Firmicutes; OTU155	0	0		0.000299593	0.000556388	0	0.000171196	0	0	0	0	0	0	0	0	0	0	0	0	0	0	0.0345016
d__Bacteria; k__norank_d__Bacteria; p__Firmicutes; c__Clostridia; o__Lachnospirales; f__Lachnospiraceae; g__unclassified_f__Lachnospiraceae; s__unclassified_f__Lachnospiraceae; OTU114	0	0		4.27991e-05	0	0.000813182	4.27991e-05	8.55981e-05	0	0	0	0	0	0	0	0	0	0	0	0	0	0.00846403
d__Bacteria; k__norank_d__Bacteria; p__Firmicutes; c__Bacilli; o__Erysipelotrichales; f__Erysipelotrichaceae; g__Faecalibaculum; s__uncultured_bacterium_g__Faecalibaculum; OTU771	0	0		0	0	8.55981e-05	0	0	0	8.55981e-05	4.27991e-05	0	8.55981e-05	0	0.000599187	0	0	0	0	0	0	0.036535
d__Bacteria; k__norank_d__Bacteria; p__Firmicutes; c__Clostridia; o__Clostridia_vadinBB60_group; f__norank_o__Clostridia_vadinBB60_group; g__norank_f__norank_o__Clostridia_vadinBB60_group; s__unclassified_g__norank_f__norank_o__Clostridia_vadinBB60_group; OTU446	0	0		0	0	0	0	0	0	0	0	0	0	0	0	0	0.000171196	0	0.000128397	0.000556388	0	0.0345016
d__Bacteria; k__norank_d__Bacteria; p__Firmicutes; c__Bacilli; o__Lactobacillales; f__unclassified_o__Lactobacillales; g__unclassified_o__Lactobacillales; s__unclassified_o__Lactobacillales; OTU638	0	0		0	0	0	0	0	0	0.000171196	0	0.000171196	0	0.000213995	4.27991e-05	0	4.27991e-05	0	4.27991e-05	0	0	0.0393794
d__Bacteria; k__norank_d__Bacteria; p__Actinobacteriota; c__Coriobacteriia; o__Coriobacteriales; f__Eggerthellaceae; g__DNF00809; s__uncultured_bacterium_g__DNF00809; OTU551	0	0		0	0	0	0	0	0	0.000213995	8.55981e-05	0	0	0	0.000171196	0	0	0	0	0	0	0.0345016
d__Bacteria; k__norank_d__Bacteria; p__Firmicutes; c__Clostridia; o__Peptostreptococcales-Tissierellales; f__Anaerovoracaceae; g__Family_XIII_AD3011_group; s__uncultured_bacterium_g__Family_XIII_AD3011_group; OTU424	0	0		8.55981e-05	0	8.55981e-05	4.27991e-05	4.27991e-05	4.27991e-05	0	0	4.27991e-05	0	0	0	0	0	0	4.27991e-05	4.27991e-05	4.27991e-05	0.0471164
d__Bacteria; k__norank_d__Bacteria; p__Bacteroidota; c__Bacteroidia; o__Bacteroidales; f__Prevotellaceae; g__Alloprevotella; s__uncultured_Bacteroidales_bacterium_g__Alloprevotella; OTU269	0	0		0	0	4.27991e-05	0	4.27991e-05	0	0	0	0	0	0	0	0	8.55981e-05	4.27991e-05	0.000128397	0	8.55981e-05	0.0393794
d__Bacteria; k__norank_d__Bacteria; p__Bacteroidota; c__Bacteroidia; o__Bacteroidales; f__Muribaculaceae; g__norank_f__Muribaculaceae; s__unclassified_g__norank_f__Muribaculaceae; OTU778	0	0		0	0	0	0	0	0	4.27991e-05	0	0	4.27991e-05	0	0.000342392	0	0	0	0	0	0	0.0342181
d__Bacteria; k__norank_d__Bacteria; p__unclassified_k__norank_d__Bacteria; c__unclassified_k__norank_d__Bacteria; o__unclassified_k__norank_d__Bacteria; f__unclassified_k__norank_d__Bacteria; g__unclassified_k__norank_d__Bacteria; s__unclassified_k__norank_d__Bacteria; OTU224	0	0		4.27991e-05	0.000128397	0	0.000213995	0	4.27991e-05	0	0	0	0	0	0	0	0	0	0	0	0	0.00846403
d__Bacteria; k__norank_d__Bacteria; p__Firmicutes; c__Bacilli; o__RF39; f__norank_o__RF39; g__norank_f__norank_o__RF39; s__uncultured_bacterium_g__norank_f__norank_o__RF39; OTU17	0	0		0.000299593	4.27991e-05	0	0	0	4.27991e-05	0	0	0	0	0	0	0	0	0	0	0	0	0.0342181
d__Bacteria; k__norank_d__Bacteria; p__Firmicutes; c__Clostridia; o__Oscillospirales; f__Ruminococcaceae; g__Negativibacillus; s__unclassified_g__Negativibacillus; OTU109	0	0		8.55981e-05	0.000128397	0.000171196	0	0	0	0	0	0	0	0	0	0	0	0	0	0	0	0.0345016
d__Bacteria; k__norank_d__Bacteria; p__Bacteroidota; c__Bacteroidia; o__Bacteroidales; f__Muribaculaceae; g__norank_f__Muribaculaceae; s__uncultured_bacterium_g__norank_f__Muribaculaceae; OTU217	0	0		8.55981e-05	8.55981e-05	0	4.27991e-05	0	8.55981e-05	0	0	0	0	0	0	0	0	0	0	0	4.27991e-05	0.0242643
d__Bacteria; k__norank_d__Bacteria; p__Firmicutes; c__Clostridia; o__Oscillospirales; f__Oscillospiraceae; g__unclassified_f__Oscillospiraceae; s__unclassified_f__Oscillospiraceae; OTU99	0	0		0	4.27991e-05	8.55981e-05	0	8.55981e-05	4.27991e-05	0	0	0	0	0	0	0	0	4.27991e-05	0	4.27991e-05	0	0.046447
d__Bacteria; k__norank_d__Bacteria; p__Firmicutes; c__Clostridia; o__Clostridia_vadinBB60_group; f__norank_o__Clostridia_vadinBB60_group; g__norank_f__norank_o__Clostridia_vadinBB60_group; s__uncultured_bacterium_g__norank_f__norank_o__Clostridia_vadinBB60_group; OTU373	0	0		0	0	0	0	0	0	0	0	0	0	0	0	0	8.55981e-05	0	4.27991e-05	0.000171196	0	0.0345016
d__Bacteria; k__norank_d__Bacteria; p__Desulfobacterota; c__Desulfovibrionia; o__Desulfovibrionales; f__Desulfovibrionaceae; g__Desulfovibrio; s__uncultured_bacterium_g__Desulfovibrio; OTU545	0	0		0	0	0	0	0	0	4.27991e-05	0	0	4.27991e-05	0	0.000213995	0	0	0	0	0	0	0.0342181
d__Bacteria; k__norank_d__Bacteria; p__Firmicutes; c__Clostridia; o__Peptostreptococcales-Tissierellales; f__Peptostreptococcaceae; g__Clostridioides; s__Clostridioides_difficile_g__Clostridioides; OTU662	0	0		0	0	0	0	0	0	0.000171196	0	0	4.27991e-05	0	8.55981e-05	0	0	0	0	0	0	0.0345016
d__Bacteria; k__norank_d__Bacteria; p__Firmicutes; c__Clostridia; o__Clostridia_UCG-014; f__norank_o__Clostridia_UCG-014; g__norank_f__norank_o__Clostridia_UCG-014; s__unclassified_g__norank_f__norank_o__Clostridia_UCG-014; OTU530	0	0		0	0	0	0	0	0	8.55981e-05	4.27991e-05	0	4.27991e-05	0	4.27991e-05	0	0	0	0	0	0	0.00822975
d__Bacteria; k__norank_d__Bacteria; p__unclassified_k__norank_d__Bacteria; c__unclassified_k__norank_d__Bacteria; o__unclassified_k__norank_d__Bacteria; f__unclassified_k__norank_d__Bacteria; g__unclassified_k__norank_d__Bacteria; s__unclassified_k__norank_d__Bacteria; OTU375	0	0		0	0	0	0	0	0	0	0	0	0	0	0	0	4.27991e-05	4.27991e-05	8.55981e-05	4.27991e-05	0	0.00822975
d__Bacteria; k__norank_d__Bacteria; p__Firmicutes; c__Clostridia; o__Lachnospirales; f__Lachnospiraceae; g__Eisenbergiella; s__uncultured_bacterium_g__Eisenbergiella; OTU608	0	0		0	0	0	0	0	0	0	4.27991e-05	0	8.55981e-05	0	4.27991e-05	0	0	0	0	0	0	0.0342181
d__Bacteria; k__norank_d__Bacteria; p__Actinobacteriota; c__Actinobacteria; o__Micrococcales; f__Micrococcaceae; g__Rothia; s__Rothia_nasimurium; OTU526	0	0		0	0	0	0	0	0	8.55981e-05	0	0	4.27991e-05	4.27991e-05	0	0	0	0	0	0	0	0.0342181
d__Bacteria; k__norank_d__Bacteria; p__Bacteroidota; c__Bacteroidia; o__Bacteroidales; f__Muribaculaceae; g__norank_f__Muribaculaceae; s__uncultured_bacterium_g__norank_f__Muribaculaceae; OTU763	0	0		0	0	0	0	0	0	0	8.55981e-05	0	4.27991e-05	0	4.27991e-05	0	0	0	0	0	0	0.0342181
d__Bacteria; k__norank_d__Bacteria; p__Desulfobacterota; c__Desulfovibrionia; o__Desulfovibrionales; f__Desulfovibrionaceae; g__Desulfovibrio; s__unclassified_g__Desulfovibrio; OTU369	0	0		0	0	0	0	0	0	0	0	0	0	0	0	0	0	4.27991e-05	8.55981e-05	4.27991e-05	0	0.0342181
